# Supplementary material
Source: PubMed Central journal article supplement (PMC8345319)
Supplement: NIHMS1698129-supplement-Supporting_Information_pdf.pdf [file NIHMS1698129-supplement-Supporting_Information_pdf.pdf]

## Supporting Information for:

### A Mechanistic Study of Isotactic Poly(propylene oxide) Synthesis by a Tethered Bimetallic Chromium Salen Catalyst

Bryce M. Lipinski,<sup>‡</sup> Katherine L. Walker,<sup>†</sup> Naomi E. Clayman,<sup>†</sup> Lilliana S. Morris,<sup>‡,†</sup> Timothy M. E. Jugovic,<sup>§</sup> Allison G. Roessler,<sup>§</sup> Yutan D. Y. L. Getzler,<sup>‡</sup> Samantha N. MacMillan,<sup>‡</sup> Richard N. Zare,<sup>†,\*</sup> Paul M. Zimmerman,<sup>§,\*</sup> Robert M. Waymouth,<sup>†,\*</sup> and Geoffrey W. Coates<sup>‡,\*</sup>

<sup>‡</sup>Department of Chemistry and Chemical Biology, Cornell University, Ithaca, New York 14853-1301, United States

<sup>†</sup>Department of Chemistry, Stanford University, Stanford, California 94305-5080, United States

<sup>§</sup>Department of Chemistry, University of Michigan, Ann Arbor, Michigan 48109-1382, United States

<sup>†</sup>K.L.W., N.E.C., and L.S.M. contributed equally

\* E-mail: coates@cornell.edu

\* E-mail: waymouth@stanford.edu

\* E-mail: paulzim@umich.edu

\* E-mail: zare@stanford.edu

## Table of Contents

|       |                                                        |      |
|-------|--------------------------------------------------------|------|
| I.    | General Considerations .....                           | S2   |
| II.   | Materials and Synthesis .....                          | S3   |
| III.  | Nomenclature Assignment .....                          | S4   |
| IV.   | Kinetic Polymerization Conditions and Analysis .....   | S5   |
| V.    | Mass Spectrometry Analysis .....                       | S10  |
| VI.   | Computational Analysis and Coordinates .....           | S17  |
| VII.  | X-ray Crystallography Conditions and Coordinates ..... | S85  |
| VIII. | References .....                                       | S105 |

## I. General Considerations

All reactions and subsequent manipulations were performed under N<sub>2</sub> using a glovebox or Schlenk line. All NMR spectra were recorded on a 500 MHz Bruker AV III HD spectrometer with broadband Prodigy Cryoprobe (<sup>1</sup>H, 500 MHz). <sup>1</sup>H and <sup>13</sup>C chemical shifts are referenced to the solvent residual peaks. All NMR spectra were processed using MestReNova (*V. 10.0.1-14719*) software package. Mass spectrometry (MS) experiments were conducted on an LTQ-Orbitrap XL instrument, with a resolution of 60,000 at *m/z* 400 and mass accuracy of less than 5 ppm, manufactured by Thermo Fisher Scientific (San Jose, CA). Collision induced dissociation (CID) spectra were taken in tandem MS mode by colliding desired ions with helium. Data was preliminarily analyzed in Thermo Fisher's Qual Browser tool, and exported as text files for further processing in Matlab. Data was recorded with the following parameters unless otherwise specified: -2 kV spray voltage, 275 °C capillary temperature, -60 V capillary voltage, -100 V tube voltage, flow rate of 5 uL/min. Gel permeation chromatography (GPC) was performed using an Agilent 1260 Infinity system, equipped with UV and refractive index detectors, and two Agilent PolyPore columns (5 micron, 4.6 mm ID). The GPC columns were eluted with THF at 30 °C at 0.3 mL/min and were calibrated with monodisperse polystyrene standards.

## II. Materials and Synthesis

All reagents and materials were purchased from commercial vendors and were used as received unless otherwise noted. 1,2-Dimethoxyethane (DME), propylene oxide (PO), 1,4-butanediol (1,4-BD), 1,2-butanediol (1,2-BD), 1,2-propanediol (1,2-PD), 1,6-hexanediol (1,6-HD), and bis(triphenylphosphine)iminium chloride ([PPN]Cl) were purchased from Sigma-Aldrich. Deuterated solvents were purchased from Cambridge Isotope Laboratory. 3 Å molecular sieves were purchased from Alfa Aesar and activated by heating at 200 °C under vacuum for 18 hours, and stored in a nitrogen filled glove box. [PPN]Cl was recrystallized at room temperature over 5 days from anhydrous methylene chloride/hexane and dried at 80 °C under vacuum overnight. DME was dried over sodium/benzophenone for 72 hours, then vacuum transfer to a Straus storage flask. Residual oxygen was removed by three freeze-pump-thaw cycles. DME was further dried and stored over activated 3 Å molecular sieves. PO was dried by stirring over calcium hydride for 72 hours, followed by vacuum transfer into a Straus storage flask. Residual oxygen was removed by three freeze-pump-thaw cycles. 1,4-BD, 1,2-BD, and 1,2-PD were dried stirring over 3 rounds of activated 3 Å molecular sieves and degassed with three freeze-pump-thaw cycles. 1,6-HD was dried by heating at 60 °C and pulling full vacuum for 18 hours. Chromium complexes **1** and **8**,<sup>1,2</sup> Bis(triphenylphosphine)iminium trifluoroacetate ([PPN][OAc<sup>F3</sup>]),<sup>1,3</sup> and (*R,R*)-*N,N'*-Bis(3,5-di-*tert*-butylsalicylidene)-1,2-cyclohexanediamino-chromium(III) chloride ((*R,R*-salcy)CrCl)<sup>4</sup> were synthesized according to reported procedures.

### III. Nomenclature Assignment

This section is here to provide clarification about small molecule and anion nomenclature assignments made here and in the main text. While the conjugate base of an alcohol is commonly referred to as an alkoxide, this assignment is not specific enough for our system that contains numerous diols. Instead, we opted to use the term “hydroxyalkanolate” to describe a diol that has been singly deprotonated (Scheme S1A). In the case of 1,2-diols, we did not differentiate between 1,2- and 2,1-hydroxyalkanolates in our assignments due to the lack of mechanistic pertinence to the induction period. While the secondary alcohol is more susceptible to deprotonation, we assigned all singly deprotonated 1,2-diols as 1,2-hydroxyalkanolates (Scheme S1B). As oligomers are generated from these hydroxyalkanolates, PO enchainment occurs on both sides of the anion as a result of rapid chain transfer. This systematic naming does not claim the exact enchainment order of the oligomers (Scheme S1C).<sup>5</sup>

**Scheme S1. General Clarifications for Nomenclature Assignments**

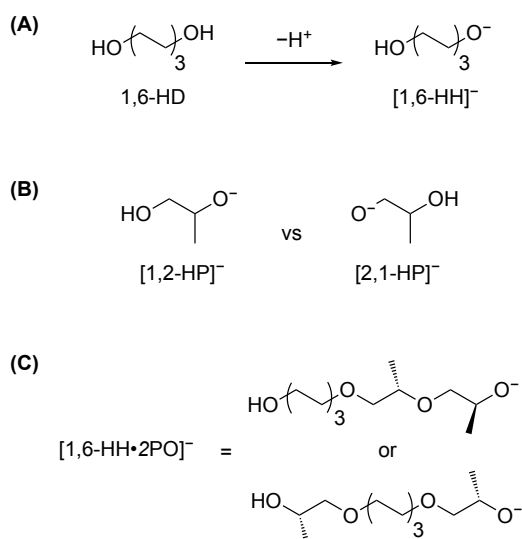

## IV. Kinetic Polymerization Conditions and Analysis

### Scheme S2. General Conditions for Kinetic Analysis

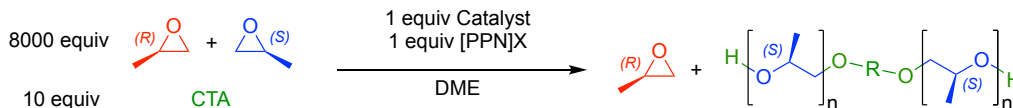

General polymerization setup: A 20 mL scintillation vial and stir bar was charged with **1/8** (0.0018 mmol), [PPN][OAc<sup>F3</sup>]/[PPN]Cl (0.0018 mmol) and the appropriate CTA (0.018 mmol, 1,6-HD: 2.1 mg; 1,2-BD: 1.6  $\mu\text{L}$ ; 1,2-PD: 1.4 mg; water: 0.3  $\mu\text{L}$ \*). DME (2.0 mL) was added and mixture was stirred until all reagents were dissolved. Lastly, PO (1.0 mL, 14.3 mmol) was added to initiate the reaction.

\*For water CTA reactions, a stock solution of the CTA in DME was made using standard Schlenk technique. The stock solution was used in the glovebox followed by extended periods of purging.

Conversion was measured hourly by taking 200  $\mu\text{L}$  aliquots, removing PO and DME under vacuum, and undergoing <sup>1</sup>H NMR analysis against mesitylene as an internal standard. Each data point reported is the average of three experiments and the error bars provided show a standard deviation above and below that average.

A gel permeation chromatogram was provided to show the water content for a polymerization under these standard conditions (Figure S1). This trace is the result of a polymerization using **8** and [PPN]Cl in the absence of CTA. The high molecular weight shoulder is the result of adventitious water reacting to form 1,2-PD, which then acts as a CTA. The low molecular weight peak is the result of [Cl]<sup>-</sup> initiated chains.

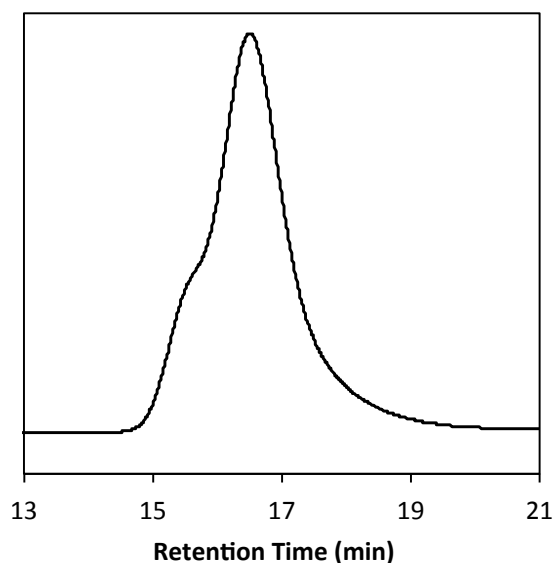

**Figure S1.** GPC chromatogram of PO polymerization at 45% conversion using **8** without CTA under these standard kinetic conditions.

From the text, it is clear that the presence of 1,2-diols resulted in a longer induction period, while polymerizations with 1,6-HD did not. For curiosity purposes, preliminary experiments were performed with 1,3- and 1,4-diols. We found that 1,3-diols behave like 1,2-diols (have an additional induction period) and 1,4-diols behave more like 1,6-diols (no additional induction period). These results agree with the coordination behavior observed by mass spectrometry.

Representative <sup>1</sup>H NMR spectra for polymerization conversion are presented Figures S2–S7.

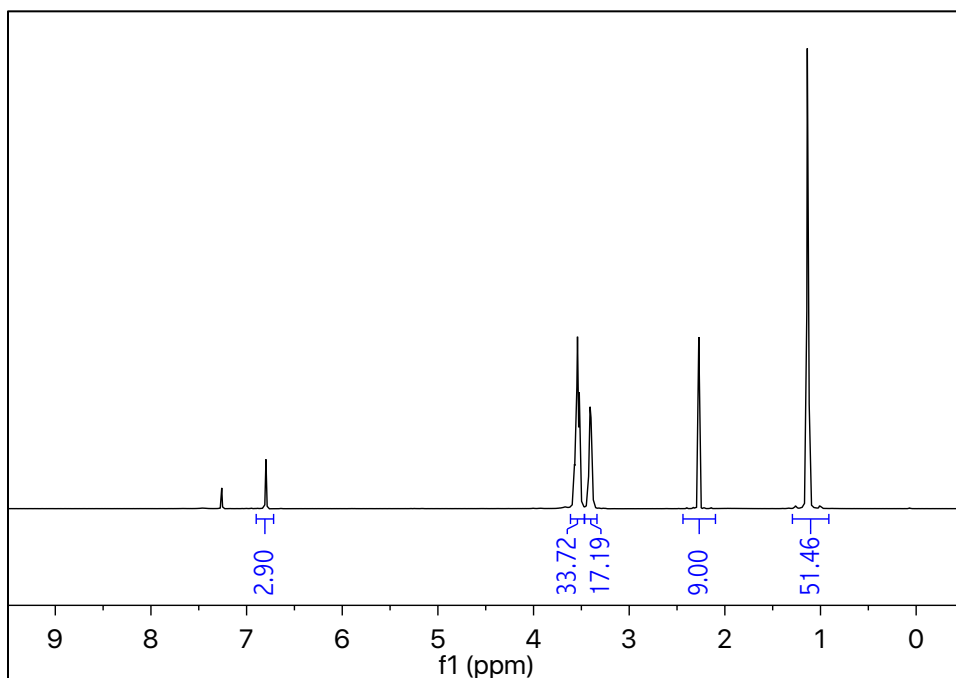

**Figure S2.** <sup>1</sup>H NMR spectrum in CDCl<sub>3</sub> of polymerization using **1** after 4 hours with no CTA (26.1% conversion of PO).

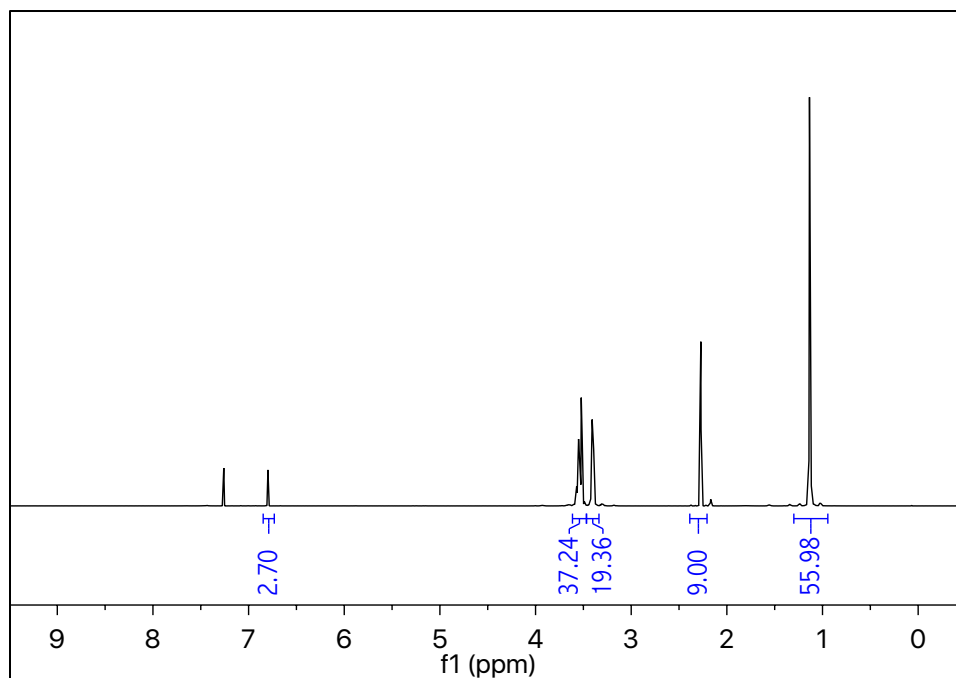

**Figure S3.** <sup>1</sup>H NMR spectrum in CDCl<sub>3</sub> of polymerization using **1** after 4 hours with 1,6-HD as the CTA (28.0% conversion of PO).

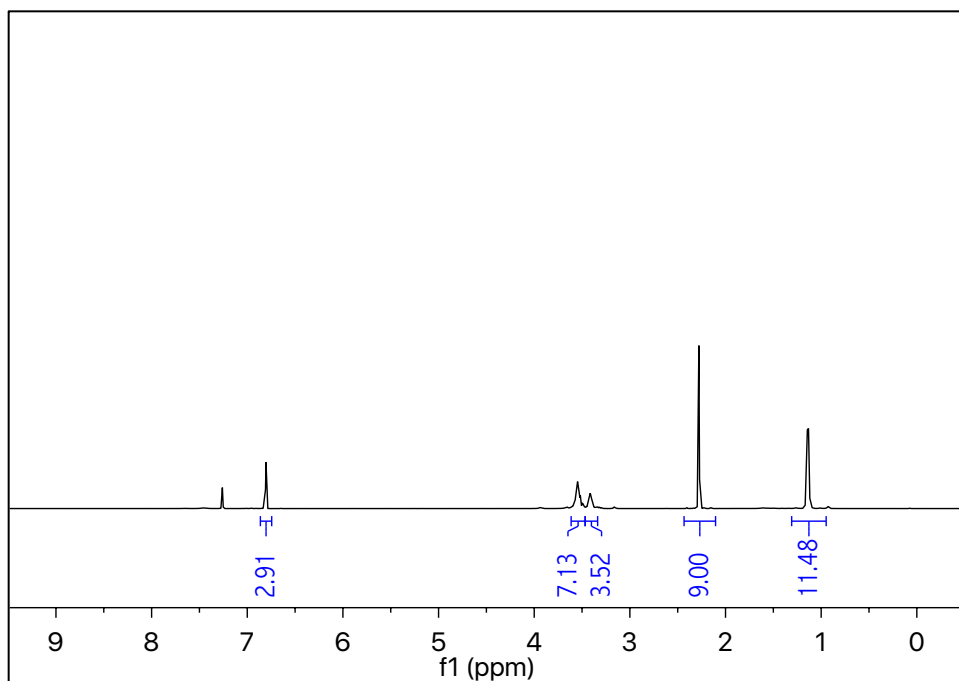

**Figure S4.** <sup>1</sup>H NMR spectrum in CDCl<sub>3</sub> of polymerization using **1** after 4 hours with 1,2-BD as the CTA (5.8% conversion of PO).

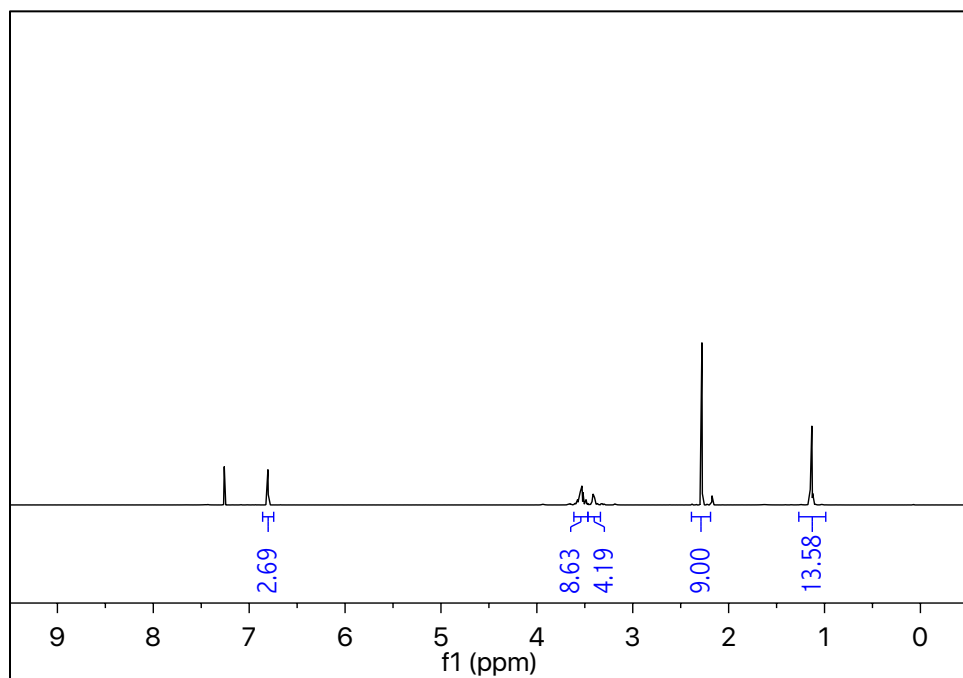

**Figure S5.** <sup>1</sup>H NMR spectrum in CDCl<sub>3</sub> of polymerization using **1** after 4 hours with H<sub>2</sub>O as the CTA (6.6% conversion of PO).



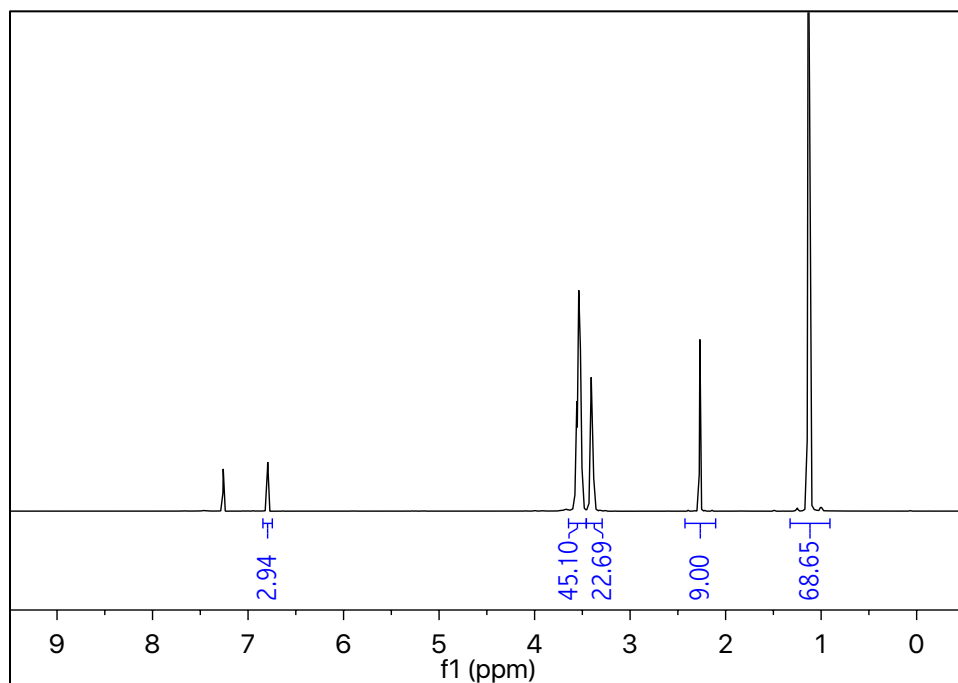

**Figure S6.**  $^1\text{H}$  NMR spectrum in  $\text{CDCl}_3$  of polymerization using **8** after 4 hours with no CTA (34.8% conversion of PO).

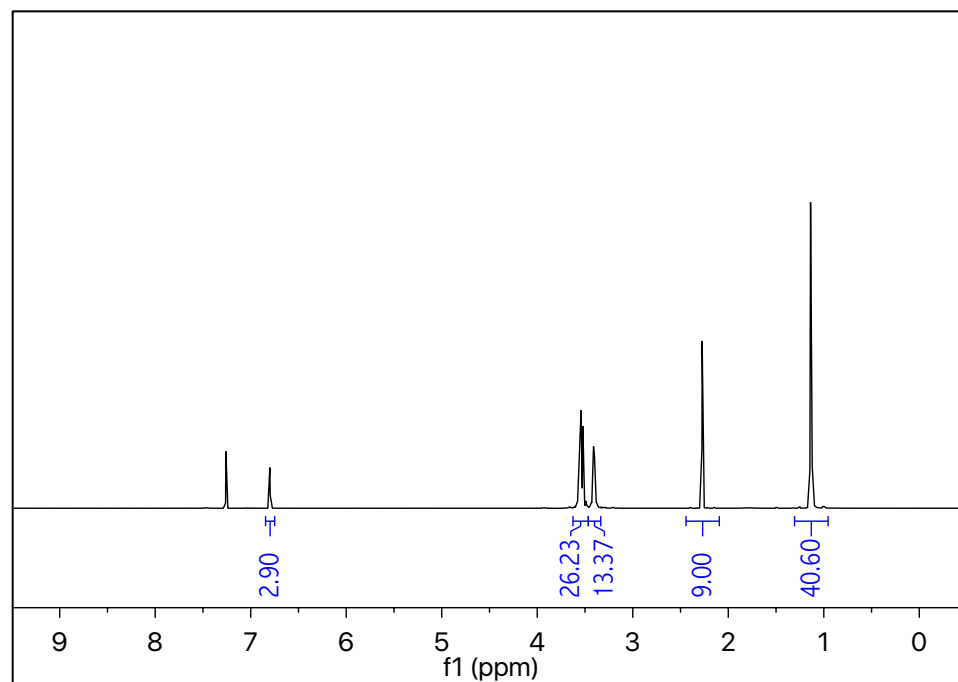

**Figure S7.**  $^1\text{H}$  NMR spectrum in  $\text{CDCl}_3$  of polymerization using **8** after 4 hours with 1,2-PD as the CTA (20.4% conversion of PO).

## V. Mass Spectrometry Analysis

General sample preparation: A 20 mL scintillation vial and stir bar was charged with **1** (2.0 mg, 0.0013 mmol), [PPN][OAc<sup>F3</sup>] (0.9 mg, 0.0013 mmol) and DME (2.25 mL). When appropriate, PO (0.75 mL, 10.7 mmol) and/or the corresponding CTA was added (0.013 mmol, 1,6-HD: 1.6 mg; 1,4-BD: 1.2  $\mu$ L; 1,2-BD: 1.2  $\mu$ L; 1,2-PD: 1.0  $\mu$ L; water: 0.2  $\mu$ L). Final sample preparation consisted of removing a 90  $\mu$ L aliquot of the reaction mixture and diluting into 200  $\mu$ L of DME. Solvents used in the MS experiments were dried by stirring over calcium hydride for 72 hours.

Data were preliminarily analyzed in Thermo Fisher's Qual Browser tool and then exported as text files for further processing in MatLab. Species were assigned by the primary ion clusters observed. Representative tables for all assignable species observed in Figures 1A and 1B are provided.

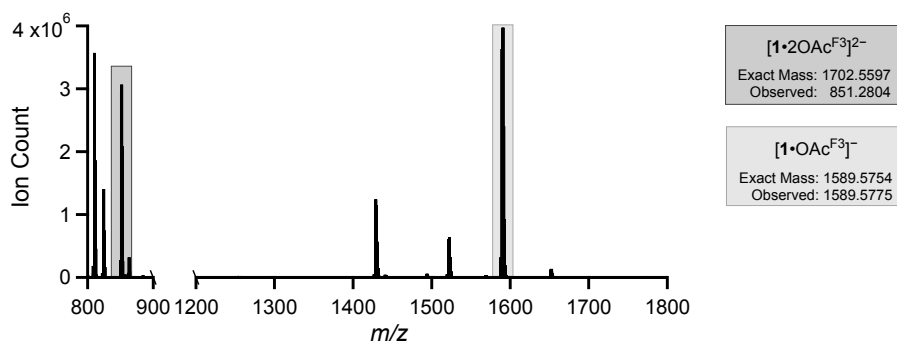

**Figure S8.** Mass spectrum of the activated complex ([1•OAc<sup>F3</sup>][PPN]) in the presence of 1,6-HD and absence PO (extended  $m/z$  range for Figure 1A to show doubly ionized complex). Experiments in which 1,4-BD was substituted for 1,6-HD appears almost identical.

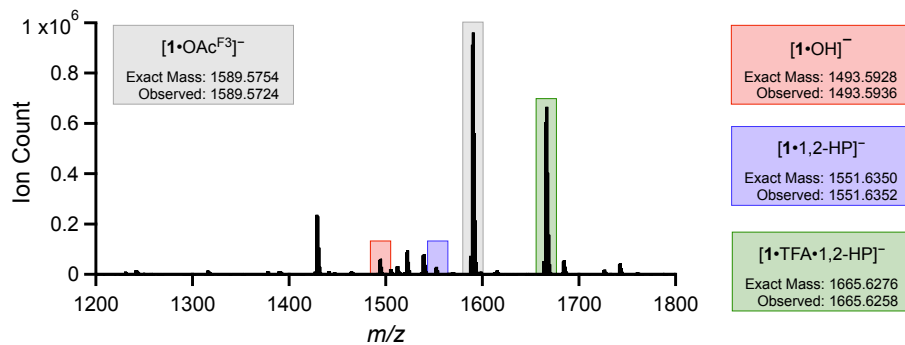

**Figure S9.** Mass spectrum of the activated complex ( $[1\bullet\text{OAc}^{\text{F}_3}][\text{PPN}]$ ) in the presence of 1,2-PD and absence PO. The 1,2-HP complex is observed (TFA = Trifluoroacetic acid).

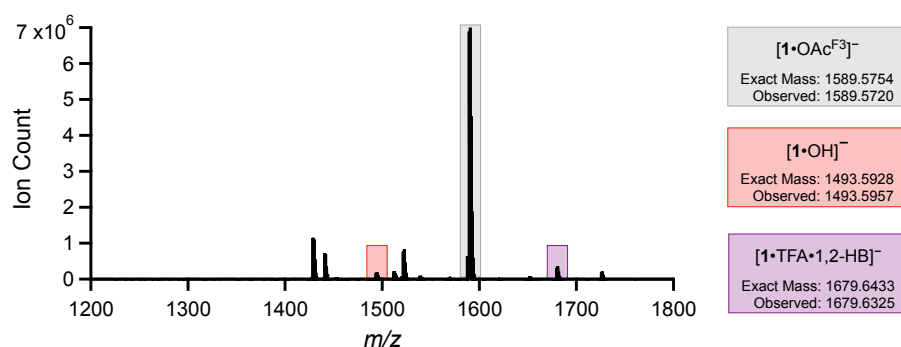

**Figure S10.** Mass spectrum of the activated complex ( $[1\bullet\text{OAc}^{\text{F}_3}][\text{PPN}]$ ) in the presence of 1,2-BD and absence PO. A 1,2-HB complex is observed (TFA = Trifluoroacetic acid).

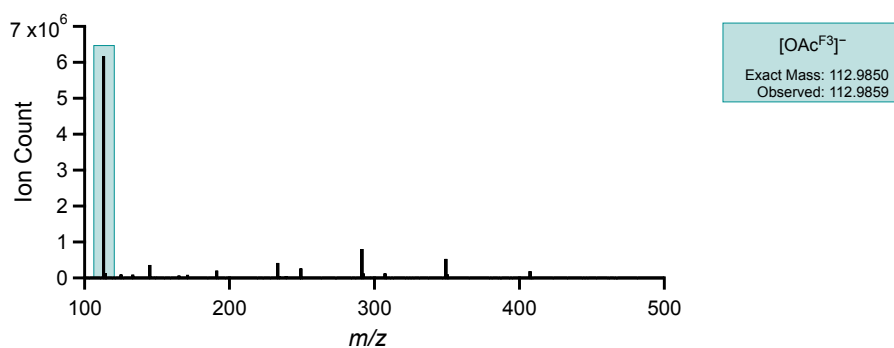

**Figure S11.** Low  $m/z$  mass spectrum of the activated complex ( $[1\bullet\text{OAc}^{\text{F}_3}][\text{PPN}]$ ) in the presence of 1,6-HD and PO after 1.0 h (extended  $m/z$  range for Figure 1C to show off-scale  $[\text{OAc}^{\text{F}_3}]^-$  signal).

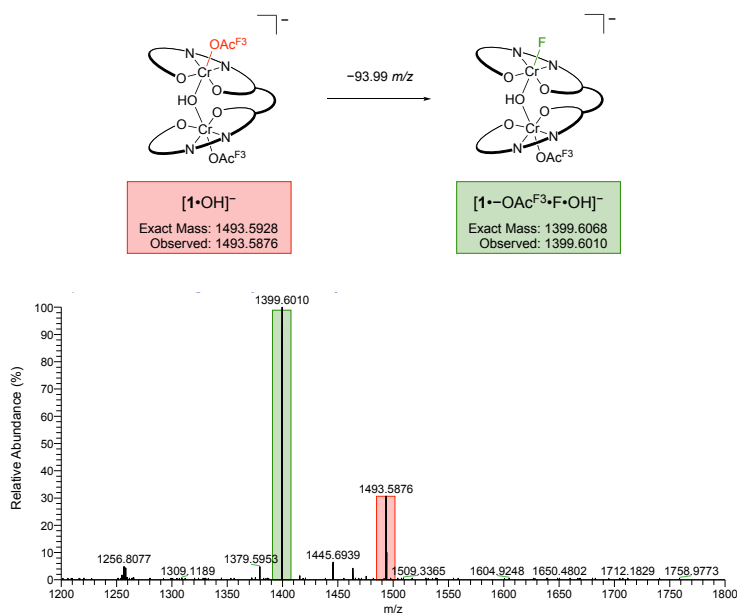

**Figure S12.** CID on  $[1\cdot\text{OH}]^-$  ( $1493.5876\text{ m/z}$ ) with normalized collision energy = 13. The primarily resulting fragment was  $1399.6010\text{ m/z}$ , consistent with  $[\text{OAcF}^3]^-$  fragmenting to  $\text{F}^-$ . No observed loss or fragmentation of  $[\text{OH}]^-$ .

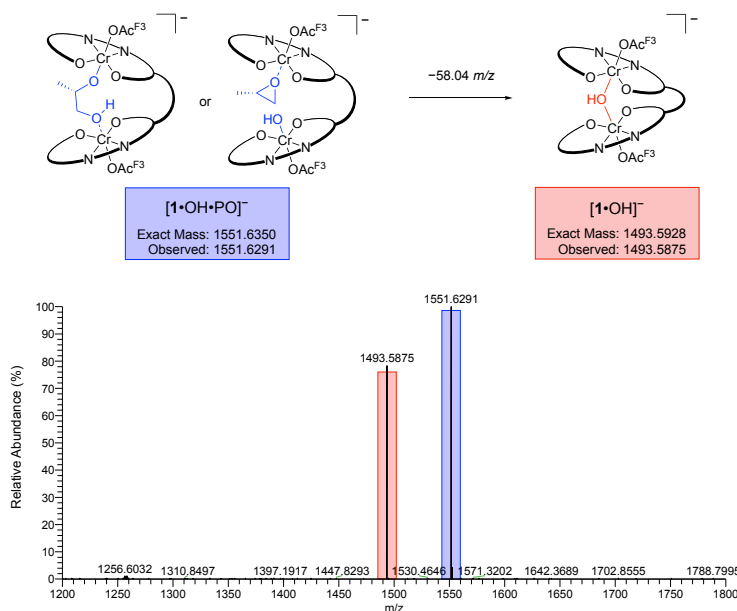

**Figure S13.** CID on  $[1\cdot\text{OH}\cdot\text{PO}]^-$  ( $1551.6291\text{ m/z}$ ) with normalized collision energy = 11. The primarily resulting fragment was  $1493.5875\text{ m/z}$ , consistent with the loss of PO.

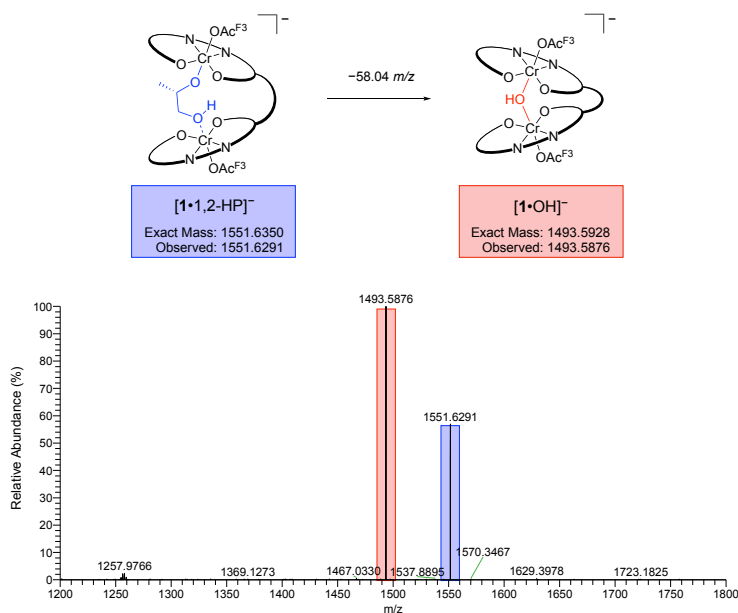

**Figure S14.** CID on  $[1\bullet 1,2\text{-HP}]^-$  ( $1551.6291\text{ m/z}$ ) with normalized collision energy = 11. The primarily resulting fragment was  $1493.5876\text{ m/z}$ , consistent with the loss of PO.

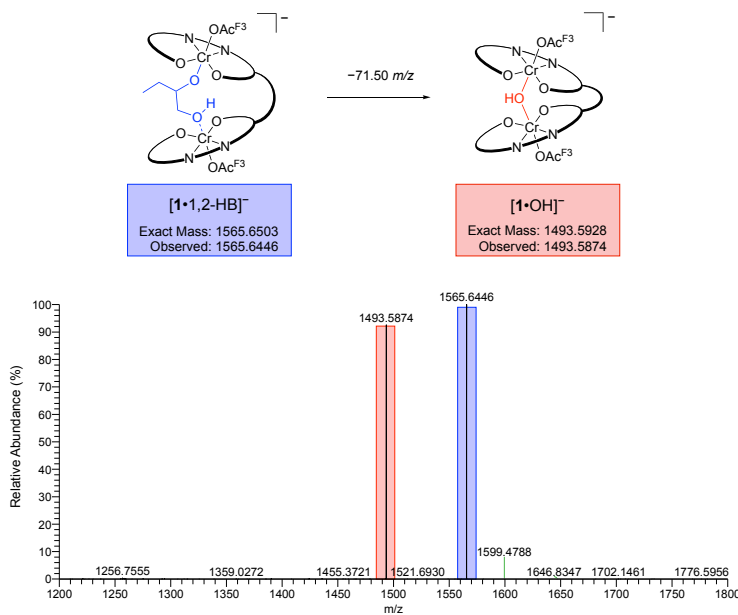

**Figure S15.** CID on  $[1\bullet 1,2\text{-HB}]^-$  ( $1565.6446\text{ m/z}$ ) with normalized collision energy = 12. The primarily resulting fragment was  $1493.5874\text{ m/z}$ , consistent with the loss of 1,2-butylene oxide.

**Table S1:** Assignable Cr species from Figure 1A and Figure 1B

Proposed Structure:

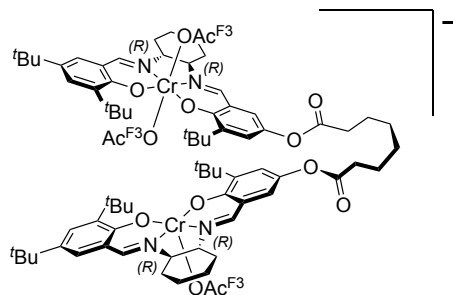

| Experimental Mass | Experimental Relative Area | Simulated Mass | Simulated Relative Area | $\Delta$ ppm | Total Area |
|-------------------|----------------------------|----------------|-------------------------|--------------|------------|
| 1587.5806         | 8.0                        | 1587.5806      | 9.6                     | 0.03         | 7872       |
| 1588.5846         | 7.6                        | 1588.5838      | 9.3                     | 0.47         | 7510       |
| 1589.5775         | 91.4                       | 1589.5754      | 93.8                    | 1.32         | 91765      |
| 1590.5774         | 100.0                      | 1590.5780      | 100.0                   | -0.36        | 97533      |
| 1591.5782         | 60.5                       | 1591.5803      | 58.1                    | -1.35        | 59062      |
| 1592.5800         | 23.4                       | 1592.5822      | 24.1                    | -1.39        | 22870      |
| 1593.5827         | 4.8                        | 1593.5842      | 7.9                     | -0.98        | 4910       |
| 1594.5863         | 1.0                        | 1594.5861      | 2.1                     | 0.13         | 1054       |

Proposed Structure:

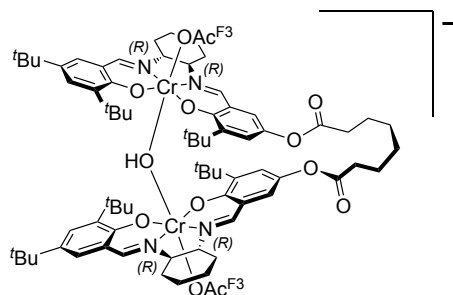

| Experimental Mass | Experimental Relative Area | Simulated Mass | Simulated Relative Area | $\Delta$ ppm | Total Area |
|-------------------|----------------------------|----------------|-------------------------|--------------|------------|
| 1491.5962         | 8.2                        | 1491.5984      | 9.8                     | -1.46        | 1159       |
| 1492.5976         | 7.3                        | 1492.6014      | 9.3                     | -2.56        | 1072       |
| 1493.5891         | 94.4                       | 1493.5928      | 95.9                    | -2.49        | 13483      |
| 1494.5925         | 100.0                      | 1494.5957      | 100.0                   | -2.14        | 14096      |
| 1495.5970         | 55.9                       | 1495.5978      | 56.7                    | -0.57        | 8079       |
| 1496.5970         | 20.1                       | 1496.5998      | 22.9                    | -1.93        | 2808       |
| 1497.6034         | 4.0                        | 1497.6018      | 7.3                     | 1.09         | 617        |
| 1498.6054         | 0.8                        | 1498.6036      | 1.9                     | 1.18         | 134        |

Proposed Structure:

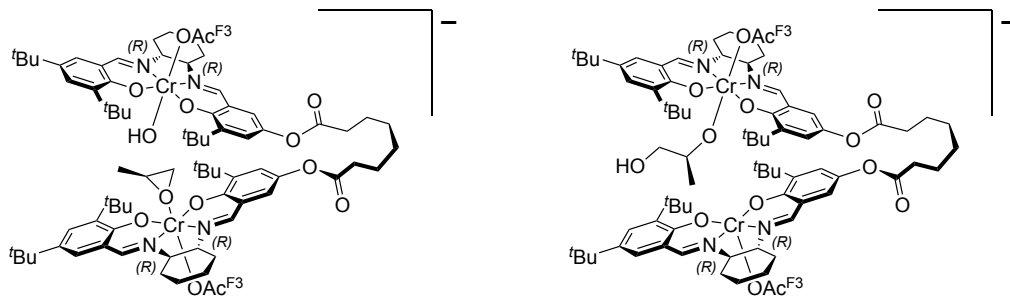

| Experimental Mass | Experimental Relative Area | Simulated Mass | Simulated Relative Area | $\Delta$ ppm | Total Area |
|-------------------|----------------------------|----------------|-------------------------|--------------|------------|
| 1549.6401         | 8.6                        | 1549.6404      | 9.5                     | -0.20        | 1683       |
| 1550.6429         | 8.3                        | 1550.6434      | 9.3                     | -0.29        | 1638       |
| 1551.6352         | 94.2                       | 1551.6350      | 92.9                    | 0.16         | 18792      |
| 1552.6400         | 100.0                      | 1552.6376      | 100.0                   | 1.49         | 20362      |
| 1553.6341         | 59.7                       | 1553.6398      | 58.6                    | -3.66        | 12151      |
| 1554.6408         | 24.3                       | 1554.6418      | 24.4                    | -0.65        | 4885       |
| 1555.6485         | 7.2                        | 1555.6437      | 8.0                     | 3.06         | 1519       |
| 1556.6455         | 1.8                        | 1556.6459      | 2.2                     | -0.22        | 361        |

Proposed Structure:

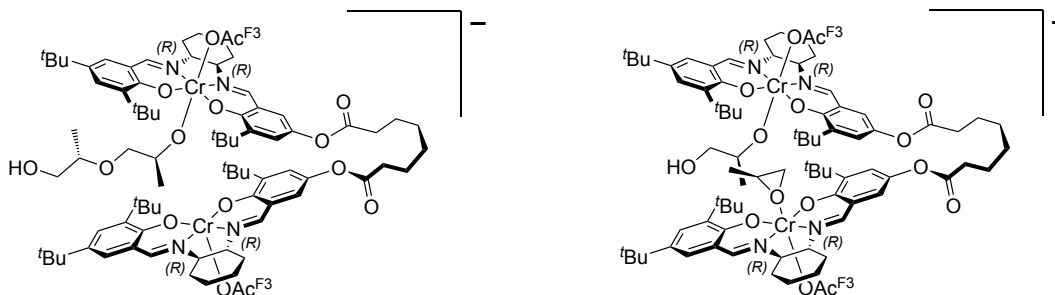

| Experimental Mass | Experimental Relative Area | Simulated Mass | Simulated Relative Area | $\Delta$ ppm | Total Area |
|-------------------|----------------------------|----------------|-------------------------|--------------|------------|
| 1607.6801         | 8.0                        | 1607.6820      | 9.2                     | -1.16        | 1349       |
| 1608.6850         | 7.3                        | 1608.6851      | 9.3                     | -0.07        | 1272       |
| 1609.6725         | 91.8                       | 1609.6767      | 90.1                    | -2.65        | 16352      |
| 1610.6792         | 100.0                      | 1610.6795      | 100.0                   | -0.18        | 18535      |
| 1611.6807         | 60.7                       | 1611.6816      | 60.4                    | -0.55        | 11147      |
| 1612.6832         | 22.2                       | 1612.6836      | 25.9                    | -0.22        | 4047       |
| 1613.6866         | 5.6                        | 1613.6858      | 8.8                     | 0.54         | 1123       |
| 1614.6849         | 1.4                        | 1614.6878      | 2.5                     | -1.79        | 298        |

Proposed Structure:

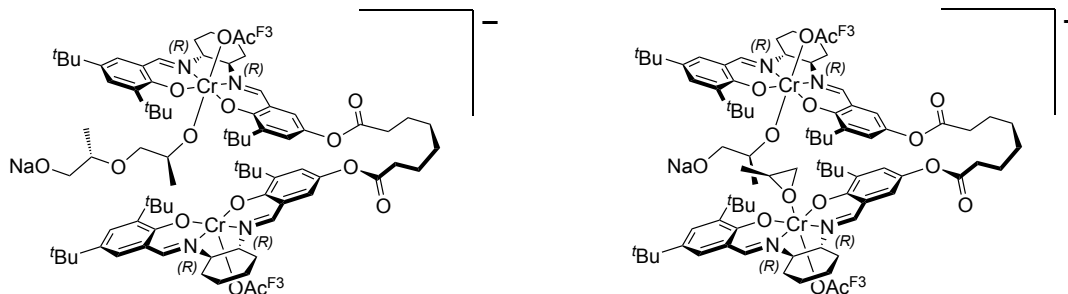

| Experimental Mass | Experimental Relative Area | Simulated Mass | Simulated Relative Area | $\Delta$ ppm | Total Area |
|-------------------|----------------------------|----------------|-------------------------|--------------|------------|
| 1629.6634         | 7.7                        | 1629.6628      | 9.2                     | 0.38         | 255        |
| 1630.6640         | 7.6                        | 1630.6662      | 9.3                     | -1.31        | 255        |
| 1631.6594         | 87.4                       | 1631.6575      | 90.1                    | 1.14         | 2984       |
| 1632.6618         | 100.0                      | 1632.6601      | 100.0                   | 1.08         | 3424       |
| 1633.6590         | 56.3                       | 1633.6624      | 60.5                    | -2.11        | 1916       |
| 1634.6633         | 19.5                       | 1634.6646      | 26.0                    | -0.79        | 673        |
| 1635.6685         | 5.5                        | 1635.6665      | 8.8                     | 1.22         | 201        |
| 1636.6684         | 1.4                        | 1636.6687      | 2.5                     | -0.15        | 54         |

Proposed Structure:

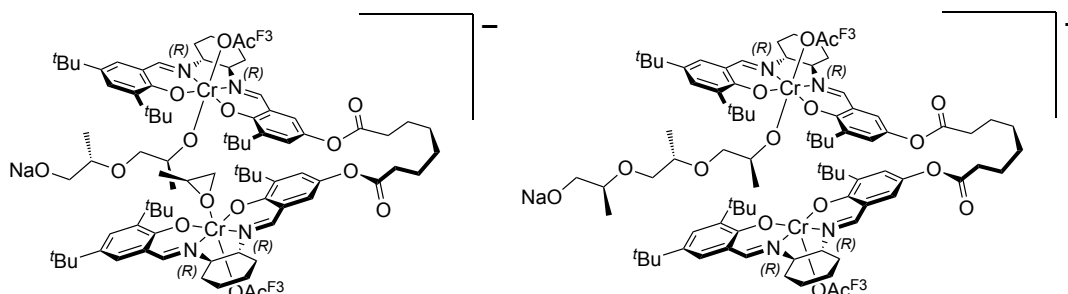

| Experimental Mass | Experimental Relative Area | Simulated Mass | Simulated Relative Area | $\Delta$ ppm | Total Area |
|-------------------|----------------------------|----------------|-------------------------|--------------|------------|
| 1687.7064         | 7.2                        | 1687.7049      | 8.9                     | 0.90         | 413        |
| 1688.7086         | 7.4                        | 1688.7077      | 9.4                     | 0.51         | 426        |
| 1689.6985         | 87.3                       | 1689.6997      | 87.5                    | -0.72        | 4948       |
| 1690.7024         | 100.0                      | 1690.7020      | 100.0                   | 0.24         | 5736       |
| 1691.7006         | 59.6                       | 1691.7044      | 62.3                    | -2.25        | 3456       |
| 1692.7063         | 22.6                       | 1692.7066      | 27.5                    | -0.19        | 1304       |
| 1693.7063         | 6.1                        | 1693.7086      | 9.6                     | -1.33        | 383        |
| 1694.7138         | 1.5                        | 1694.7107      | 2.8                     | 1.83         | 95         |



## VI. Computational Analysis and Coordinates

Quantum chemical calculations were conducted utilizing Density Functional Theory (DFT) with the Q-Chem 4.3 ab initio quantum chemistry package. Consistent with previous work,<sup>6</sup> gas phase geometry optimizations were performed with the B3LYP density functional<sup>7</sup> with spin unrestricted formalism and a mixed 6-31G/6-31G\* basis set.<sup>8</sup> The 6-31G\* basis set was applied to all heavy atoms and reactive carbons, while hydrogens and non-reactive carbons were treated with 6-31G basis set (Figure S16). Previous literature<sup>9</sup> work has found that the heptet state corresponding to two chromium (III) of spin 3/2 was the preferred electronic state. As such all calculations were performed using this charge and spin for chromium. Frequency calculations were conducted at the same level of theory with the same basis set, ensuring that all optimized structures were stable minima or transition states. Single point energies calculated with the Solvent Model based on Density (SMD) solvation model were performed at B3LYP level of theory with def2-TZVP basis set and def2/J auxiliary set with RIJCOSX integration method.<sup>10-13</sup> Transition state (TS) structures were determined using the double-ended variant of the Growing String Method (GSM).<sup>14-16</sup> GSM was used to find the exact transition state between an optimized reactant and product by finding the minimum energy pathway and TS saddle point between the two structures on the potential energy surface (PES). GSM calculations were considered converged when the transition state node has a RMS gradient less than 0.0005 HT/ Å. The EMSL Basis Set Library was the source of all basis sets used.<sup>17</sup>

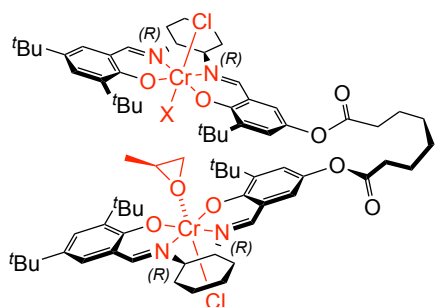

**Figure S16.** Visual representation of mixed basis set application. Atoms in red were modeled with the 6-31G\* basis set and atoms in black were modeled with the 6-31G basis set. “X” is  $[\text{OH}]^-$ ,  $[\text{1,2-HP}]^-$ , or oligomer.

Truncation of this bimetallic chromium catalyst was implemented to aid in reducing computation time. This truncation consisted of removing the *para*-*t*Bu groups. In all calculations,  $[\text{Cl}]^-$  anions were used rather than  $[\text{OAc}^{\text{F3}}]^-$ . Consistent activation energies and relative resting state energies provided quantitative agreement between models (Figure S17).

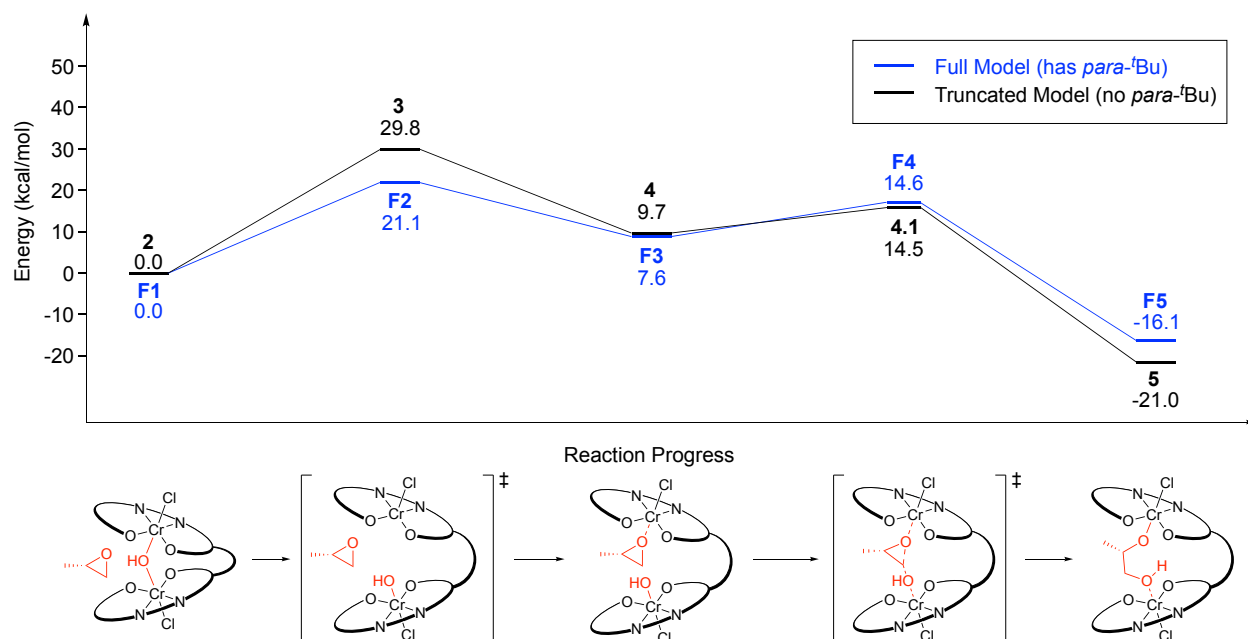

**Figure S17.** Electronic PES comparison for full catalyst and truncated models.

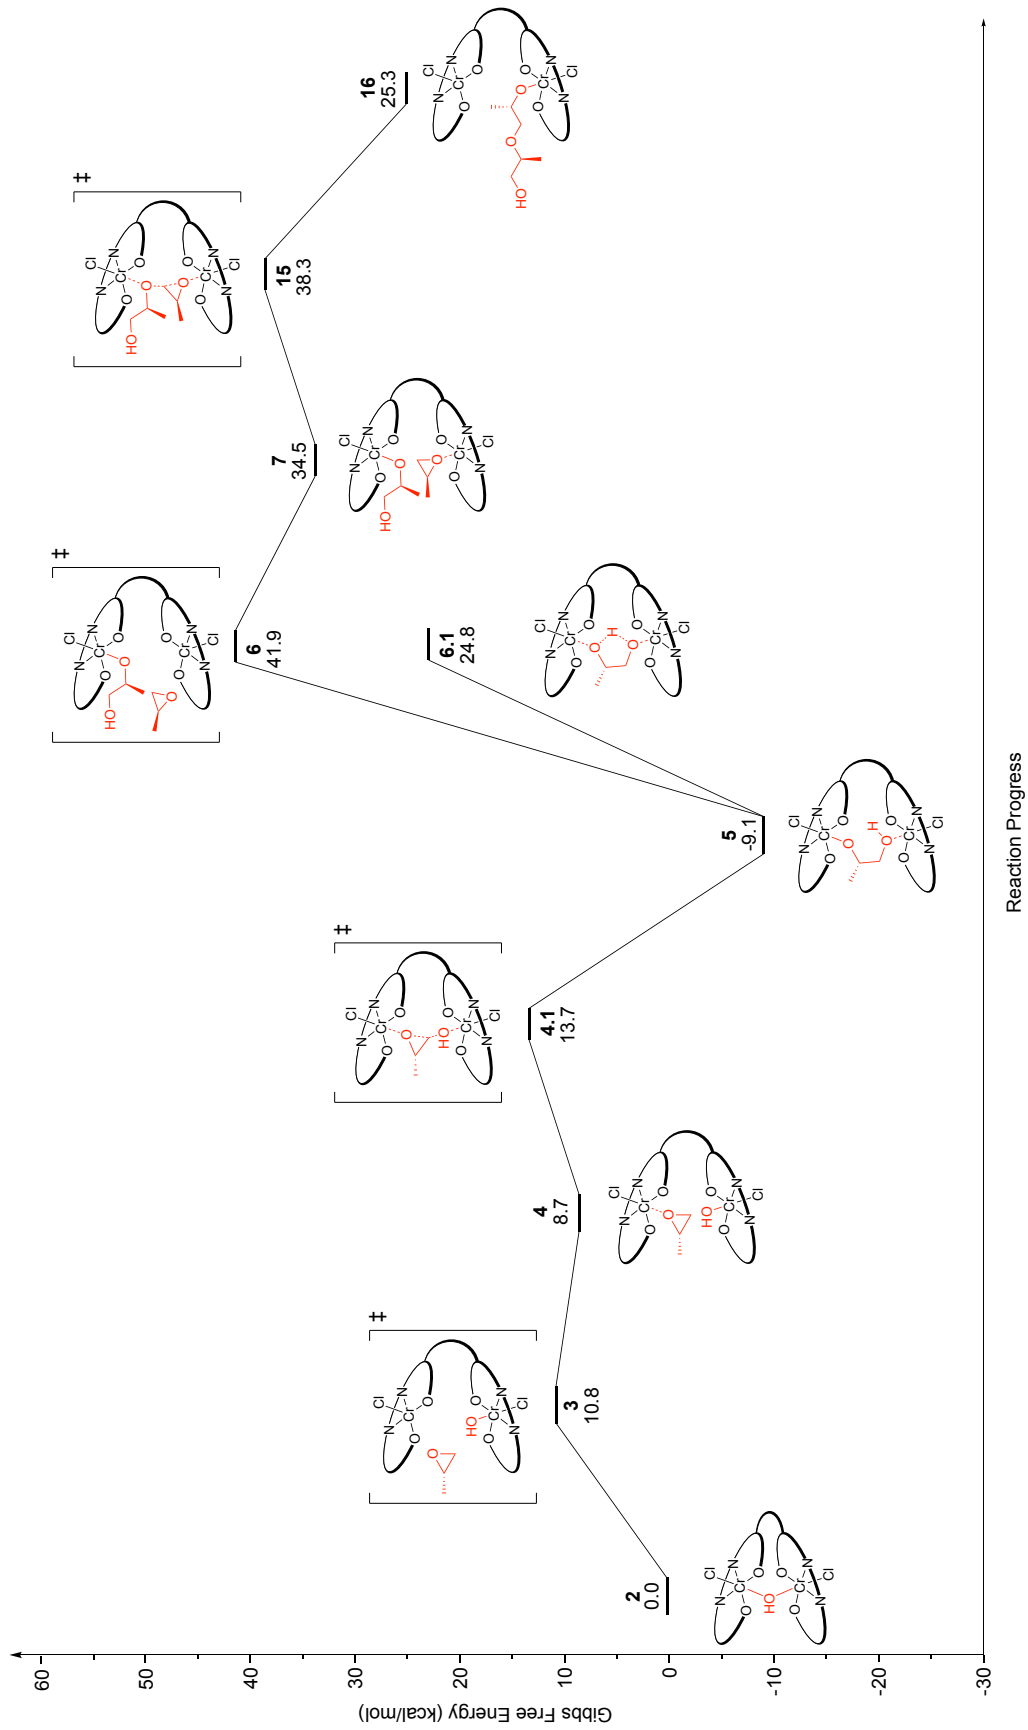

**Figure S18.** Gibbs free energy PES of ring opening epoxide polymerization starting from hydroxide.

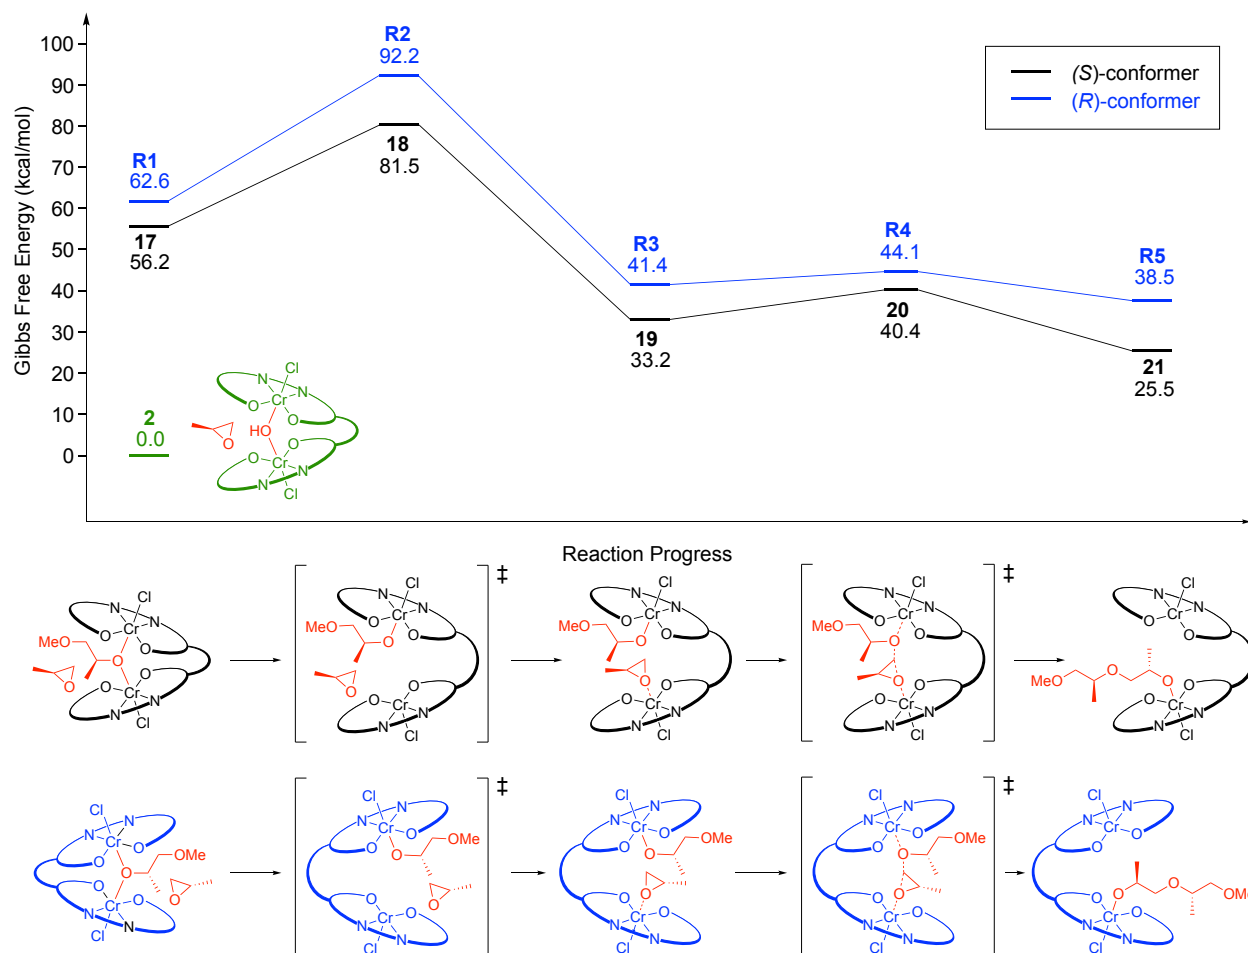

**Figure S19.** Gibbs free energy PES for (*S*)- and (*R*)-conformers of short chain ring-opening epoxide polymerization. Energies are referenced to **2**.

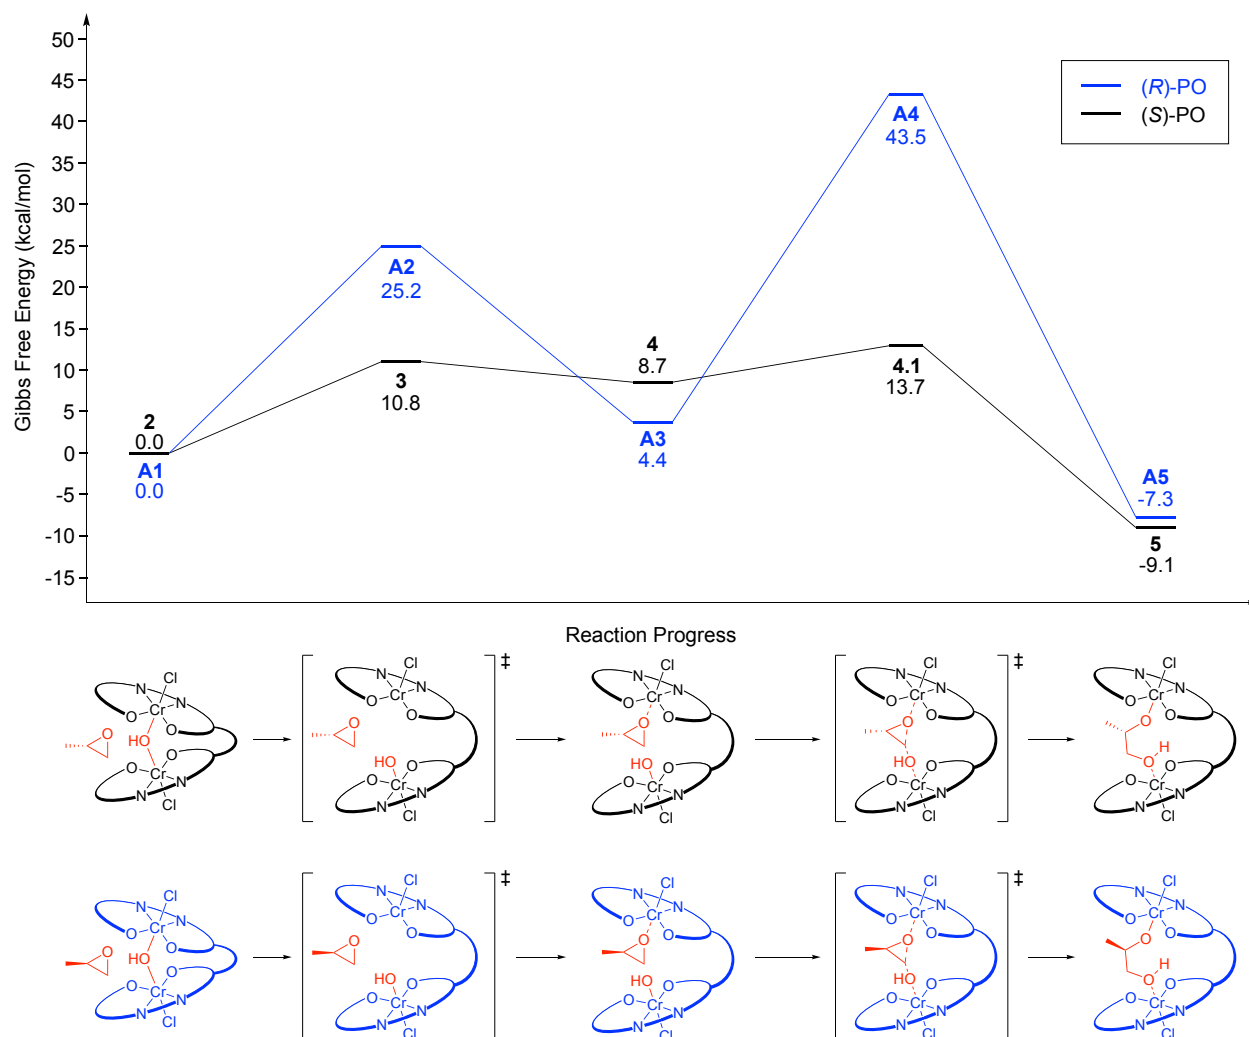

**Figure S20.** Gibbs free energy PES of short chain ring-opening epoxide polymerization with (*R*)- and (*S*)-PO.

**Table S2.** Total Electronic Energies and Free Energy Corrections

| species    | SMD/B3LYP/def2-TZVP Energy<br>(Hartree) | Gibbs Free Energy Correction at 298.15 K<br>(Hartree) |
|------------|-----------------------------------------|-------------------------------------------------------|
| <b>2</b>   | -6393.732                               | 1.291                                                 |
| <b>3</b>   | -6393.704                               | 1.289                                                 |
| <b>4</b>   | -6586.806                               | 1.376                                                 |
| <b>4.1</b> | -6586.798                               | 1.354                                                 |
| <b>5</b>   | -6586.835                               | 1.375                                                 |
| <b>6</b>   | -6586.824                               | 1.371                                                 |
| <b>6.1</b> | -6586.824                               | 1.371                                                 |
| <b>7</b>   | -6779.897                               | 1.463                                                 |
| <b>15</b>  | -6779.890                               | 1.435                                                 |
| <b>16</b>  | -6779.911                               | 1.466                                                 |
| <b>17</b>  | -6626.061                               | 0.841                                                 |
| <b>18</b>  | -6626.076                               | 0.858                                                 |
| <b>19</b>  | -6819.169                               | 0.938                                                 |
| <b>20</b>  | -6819.152                               | 0.927                                                 |
| <b>21</b>  | -6819.175                               | 0.918                                                 |
| <b>F1</b>  | -6708.327                               | -                                                     |
| <b>F2</b>  | -6708.294                               | -                                                     |
| <b>F3</b>  | -6901.415                               | -                                                     |
| <b>F4</b>  | -6901.426                               | -                                                     |
| <b>F5</b>  | -6901.464                               | -                                                     |
| <b>R1</b>  | -6626.631                               | 0.570                                                 |
| <b>R2</b>  | -6626.609                               | 0.529                                                 |
| <b>R3</b>  | -6819.721                               | 0.574                                                 |
| <b>R4</b>  | -6819.701                               | 0.532                                                 |

|           |           |       |
|-----------|-----------|-------|
| <b>R5</b> | -6819.747 | 0.571 |
| <b>A1</b> | -6394.244 | 0.512 |
| <b>A2</b> | -6587.287 | 0.476 |
| <b>A3</b> | -6587.320 | 0.518 |
| <b>A4</b> | -6587.258 | 0.488 |
| <b>A5</b> | -6587.339 | 0.509 |

**Table S3.** XYZ coordinates and Gibbs Free Energy or Electronic Energy (Hartree) for all reported structures

|            |         |         |         |   |         |         |         |
|------------|---------|---------|---------|---|---------|---------|---------|
| 2:         |         |         |         | C | -3.9235 | -0.3978 | -3.8692 |
| -6393.7323 |         |         |         | C | -3.5186 | -5.0679 | -0.5968 |
| Cr         | -1.8110 | -1.4892 | 1.1730  | C | -3.7675 | 8.2421  | -0.5002 |
| Cr         | 0.3640  | -0.9169 | -1.9613 | C | -3.1625 | 0.7915  | -4.5021 |
| Cl         | -3.4994 | -1.5725 | 2.8336  | C | -3.3483 | -3.7099 | 0.0951  |
| Cl         | 1.5905  | -0.0610 | -3.7990 | C | -4.9481 | -5.1809 | -1.1655 |
| N          | -2.0714 | -3.4752 | 0.7874  | C | -3.5841 | -2.5446 | -0.9146 |
| N          | -3.2645 | -1.2770 | -0.2169 | C | -1.4605 | 2.7693  | 2.9474  |
| N          | 0.8995  | 0.6916  | -0.8677 | C | -2.5624 | 1.3168  | 1.1210  |
| N          | 2.0798  | -1.6946 | -1.1703 | C | -2.5171 | 2.5567  | 1.8470  |
| O          | -1.2722 | -0.0697 | -2.5193 | C | -4.8009 | 7.6168  | 0.4570  |
| O          | -2.2935 | 5.8489  | -0.3159 | C | -3.6351 | 1.0969  | 0.1935  |
| O          | -0.4245 | -1.9546 | 2.4583  | C | -4.1593 | 1.5410  | -5.4129 |
| O          | -2.8112 | 5.2543  | -2.4747 | C | -5.0222 | -2.6426 | -1.4569 |
| O          | -1.6105 | 0.4247  | 1.3015  | C | -3.8606 | -0.1624 | -0.4814 |
| O          | -5.5050 | 4.5039  | -1.6592 | C | -5.2871 | -4.0124 | -2.1112 |
| O          | -5.5746 | 4.2457  | 0.6214  | C | -1.6192 | 1.6731  | 4.0353  |
| O          | 0.0375  | -2.6075 | -2.8677 | C | -3.4983 | 3.5137  | 1.5922  |
| O          | -0.4578 | -1.6483 | -0.2898 | C | -4.5916 | 2.1063  | -0.0441 |
| C          | -1.2976 | 3.4967  | -1.6069 | C | -4.5207 | 3.2876  | 0.6625  |
| C          | 0.9552  | -5.2939 | 1.7625  | C | -6.2524 | 7.7851  | -0.0424 |
| C          | -0.9054 | -4.6742 | -4.5721 | C | -6.0337 | 4.7071  | -0.5827 |
| C          | 1.4701  | -3.0267 | 3.3898  | C | -7.2183 | 6.7214  | 0.5261  |
| C          | 1.6664  | -1.8576 | 4.3715  | C | -7.3293 | 5.4743  | -0.3816 |
| C          | -2.2148 | -3.9626 | -4.1552 | C | -0.8717 | 2.1525  | -1.6853 |
| C          | -1.5429 | 1.2187  | -2.5384 | C | 2.3290  | -4.1219 | 3.3595  |
| C          | -0.1540 | -3.7938 | -5.6071 | C | 2.1000  | -5.2483 | 2.5369  |
| C          | 0.0506  | -4.2050 | 1.7299  | C | 2.9287  | -2.0437 | 5.2414  |
| C          | -1.3037 | -5.9912 | -5.2746 | C | 0.0077  | -4.9234 | -3.3586 |
| C          | 0.4416  | -1.7670 | 5.3203  | C | 0.2656  | 1.8158  | -0.8658 |
| C          | 0.3269  | -3.0227 | 2.5068  | C | 0.5179  | -3.7943 | -2.6127 |
| C          | 1.8210  | -0.5150 | 3.6152  | C | 0.4213  | -6.2010 | -2.9927 |
| C          | -2.3399 | 3.9218  | -2.4020 | C | 1.3641  | -6.4337 | -1.9651 |
| C          | -1.1733 | -4.3863 | 0.9742  | C | 1.5577  | -4.0260 | -1.6410 |
| C          | -2.5687 | 1.7112  | -3.4210 | C | 2.0281  | 0.4260  | 0.0509  |
| C          | -2.8144 | 6.0787  | -1.3940 | C | 1.9484  | -5.3514 | -1.3330 |
| C          | -2.9527 | 3.0443  | -3.3111 | C | 2.3207  | -2.9577 | -1.0280 |
| C          | -3.5494 | 7.3654  | -1.7433 | C | 2.9435  | -0.6275 | -0.6345 |
| C          | -1.6149 | 4.1464  | 3.6282  | C | 2.8576  | 1.6686  | 0.4215  |
| C          | -0.0250 | 2.7050  | 2.3717  | C | 4.0788  | -1.0511 | 0.3029  |
| C          | -2.0238 | 0.2353  | -5.3991 | C | 4.0801  | 1.3072  | 1.2887  |



|   |         |         |         |            |         |         |         |
|---|---------|---------|---------|------------|---------|---------|---------|
| C | 4.9306  | 0.1851  | 0.6603  | H          | -5.2050 | -1.8598 | -2.1962 |
| H | -2.7562 | -4.5860 | -3.4365 | H          | -5.0126 | 1.9254  | -4.8390 |
| H | 0.7392  | -6.1615 | 1.1448  | H          | -4.6846 | -4.0922 | -3.0228 |
| H | 0.3542  | -2.6857 | 5.9153  | H          | -4.6436 | -0.1353 | -1.2365 |
| H | -2.0033 | -2.9908 | -3.7075 | H          | -3.5031 | 4.4568  | 2.1204  |
| H | 0.7634  | -4.2998 | -5.9361 | H          | -4.5395 | 0.8434  | -6.1698 |
| H | 2.6629  | -0.5860 | 2.9205  | H          | -2.6236 | 1.7176  | 4.4732  |
| H | 0.1102  | -2.8247 | -5.1767 | H          | -6.3410 | -4.0733 | -2.4138 |
| H | -0.4217 | -6.5312 | -5.6425 | H          | -1.4741 | 0.6765  | 3.6150  |
| H | -1.8636 | -6.6532 | -4.5998 | H          | -6.6020 | 8.7934  | 0.2225  |
| H | 0.5769  | -0.9181 | 6.0046  | H          | -6.2766 | 7.7293  | -1.1414 |
| H | 2.0247  | 0.2916  | 4.3335  | H          | -5.7125 | -2.4815 | -0.6159 |
| H | -2.8535 | -3.8169 | -5.0377 | H          | -5.3844 | 1.9372  | -0.7635 |
| H | -1.3100 | -5.3840 | 0.5525  | H          | -6.8892 | 6.4123  | 1.5267  |
| H | -1.3130 | -0.3508 | -4.8146 | H          | -7.6795 | 5.7723  | -1.3751 |
| H | -2.7680 | -5.1717 | -1.3919 | H          | -8.2276 | 7.1412  | 0.6301  |
| H | 0.1222  | 3.5167  | 1.6471  | H          | -8.0596 | 4.7779  | 0.0522  |
| H | -2.9628 | 7.8959  | -2.5065 | H          | -0.8066 | 4.1728  | -0.9233 |
| H | -1.5045 | 4.9626  | 2.9019  | H          | 3.2023  | -4.1257 | 4.0015  |
| H | -2.8080 | 8.3553  | 0.0175  | H          | 0.0303  | -2.4604 | -0.0921 |
| H | -3.2818 | -0.9238 | -3.1612 | H          | 2.8003  | -6.0775 | 2.5431  |
| H | -0.7980 | -3.6339 | -6.4835 | H          | 3.0147  | -1.1931 | 5.9286  |
| H | -0.4785 | -1.6211 | 4.7493  | H          | 0.0289  | -7.0588 | -3.5271 |
| H | -0.8364 | 4.2519  | 4.3940  | H          | 3.8363  | -2.0824 | 4.6240  |
| H | -1.9449 | -5.7524 | -6.1319 | H          | 2.8708  | -2.9629 | 5.8382  |
| H | -2.8555 | -2.6490 | -1.7291 | H          | 0.6007  | 2.6189  | -0.2150 |
| H | 0.7011  | 2.8335  | 3.1869  | H          | 1.6552  | -7.4488 | -1.7143 |
| H | 0.9152  | -0.2748 | 3.0574  | H          | 1.6013  | -0.0342 | 0.9510  |
| H | -1.4817 | 1.0587  | -5.8808 | H          | 3.3708  | -0.1429 | -1.5248 |
| H | -5.6561 | -5.1742 | -0.3229 | H          | 2.2397  | 2.3887  | 0.9674  |
| H | -4.8228 | -0.0332 | -3.3550 | H          | 3.1852  | 2.1454  | -0.5135 |
| H | -4.1042 | 9.2424  | -0.8087 | H          | 2.7130  | -5.4989 | -0.5750 |
| H | -3.3497 | -5.8789 | 0.1235  | H          | 3.1702  | -3.2826 | -0.4228 |
| H | -2.5924 | 4.2397  | 4.1179  | H          | 3.6603  | -1.5115 | 1.2092  |
| H | -5.0696 | -6.1383 | -1.6892 | H          | 3.7347  | 0.9917  | 2.2794  |
| H | 0.1487  | 1.7434  | 1.8872  | H          | 4.7094  | -1.8031 | -0.1885 |
| H | -2.4632 | -0.4015 | -6.1801 | H          | 5.3977  | 0.5623  | -0.2623 |
| H | -3.7395 | 3.4519  | -3.9306 | H          | 4.6976  | 2.2036  | 1.4359  |
| H | -4.4993 | 7.0878  | -2.2164 | H          | 5.7403  | -0.1030 | 1.3436  |
| H | -4.2375 | -1.0971 | -4.6562 |            |         |         |         |
| H | -4.5597 | 6.5565  | 0.5867  |            |         |         |         |
| H | -4.7148 | 8.0722  | 1.4535  |            |         |         |         |
| H | -0.8795 | 1.8416  | 4.8311  |            |         |         |         |
| H | -4.1133 | -3.6032 | 0.8777  |            |         |         |         |
| H | -3.6760 | 2.3806  | -5.9282 |            |         |         |         |
|   |         |         |         | 3:         |         |         |         |
|   |         |         |         | -6393.7045 |         |         |         |
|   |         |         |         | Cr         | -5.1454 | -1.9238 | 1.2169  |
|   |         |         |         | Cr         | -4.1709 | 1.1129  | -3.2460 |
|   |         |         |         | Cl         | -7.1731 | -2.1874 | 2.4798  |

|    |         |         |         |   |         |         |         |
|----|---------|---------|---------|---|---------|---------|---------|
| Cl | -2.6675 | 1.8436  | -4.7705 | C | -6.0136 | 2.2634  | 1.3158  |
| O  | -5.6416 | 2.2139  | -3.7517 | C | -9.0557 | 9.6037  | -2.8309 |
| O  | -5.5528 | 8.2495  | -1.3744 | C | -6.5777 | 0.6395  | -0.4644 |
| O  | -3.9599 | -2.3663 | 2.7074  | C | -8.5617 | 4.3671  | -6.2086 |
| O  | -6.2117 | 7.7244  | -3.5136 | C | -7.7850 | -3.2454 | -1.9382 |
| O  | -5.1687 | 0.0425  | 1.4019  | C | -6.6818 | -0.6844 | -1.0427 |
| O  | -8.9955 | 5.0134  | 0.2783  | C | -7.8462 | -4.6202 | -2.6315 |
| O  | -7.9487 | 3.9082  | -1.4495 | C | -6.1920 | 1.5941  | 3.7350  |
| O  | -4.9859 | -0.4312 | -3.9736 | C | -6.6854 | 3.2414  | 0.5856  |
| O  | -3.5924 | -1.7118 | 0.1166  | C | -7.2638 | 1.6639  | -1.1547 |
| N  | -5.1572 | -3.8874 | 0.7064  | C | -7.3029 | 2.9397  | -0.6408 |
| N  | -6.2764 | -1.7820 | -0.4997 | C | -9.3757 | 8.0906  | -2.9715 |
| N  | -3.6989 | 2.4189  | -1.7744 | C | -8.7669 | 4.8647  | -0.9067 |
| N  | -2.8454 | -0.0377 | -2.2760 | C | -8.9639 | 7.2244  | -1.7700 |
| C  | -5.1595 | 5.6705  | -2.5648 | C | -9.3222 | 5.7432  | -2.0098 |
| C  | -2.0374 | -5.3895 | 1.8658  | C | -5.0173 | 4.2664  | -2.6691 |
| C  | -6.3051 | -2.0804 | -5.8974 | C | -0.7785 | -3.9901 | 3.3672  |
| C  | -1.7714 | -3.0125 | 3.3899  | C | -0.8989 | -5.1849 | 2.6251  |
| C  | -1.5928 | -1.6882 | 4.1502  | C | -0.2308 | -1.6084 | 4.8736  |
| C  | -7.5114 | -1.3753 | -5.2246 | C | -5.3040 | -2.6175 | -4.8575 |
| C  | -5.7594 | 3.5236  | -3.6405 | C | -4.1245 | 3.6429  | -1.7221 |
| C  | -5.5791 | -1.0713 | -6.8289 | C | -4.6198 | -1.7088 | -3.9839 |
| C  | -3.0737 | -4.4285 | 1.8319  | C | -4.9791 | -3.9739 | -4.7714 |
| C  | -6.8781 | -3.2100 | -6.7814 | C | -4.0099 | -4.4681 | -3.8760 |
| C  | -2.7013 | -1.5107 | 5.2205  | C | -3.5809 | -2.1959 | -3.1321 |
| C  | -2.9800 | -3.2333 | 2.6309  | C | -2.7715 | 1.8638  | -0.7465 |
| C  | -1.6571 | -0.5112 | 3.1408  | C | -3.3079 | -3.5800 | -3.0766 |
| C  | -6.0139 | 6.3233  | -3.4316 | C | -2.7617 | -1.3332 | -2.3094 |
| C  | -4.2082 | -4.7176 | 0.9859  | C | -1.9127 | 0.7954  | -1.4740 |
| C  | -6.6906 | 4.2176  | -4.4846 | C | -1.8478 | 2.8844  | -0.0654 |
| C  | -6.0253 | 8.5654  | -2.4504 | C | -0.9819 | 0.0614  | -0.4979 |
| C  | -6.7685 | 5.6007  | -4.3739 | C | -0.9269 | 2.1596  | 0.9357  |
| C  | -6.4643 | 9.9727  | -2.8098 | C | -0.0835 | 1.0806  | 0.2318  |
| C  | -5.7943 | 3.9988  | 3.1766  | H | -8.1264 | -2.1097 | -4.6908 |
| C  | -3.9569 | 2.3546  | 2.8185  | H | -2.1500 | -6.2943 | 1.2703  |
| C  | -6.6960 | 2.7256  | -6.5315 | H | -2.6524 | -2.3264 | 5.9545  |
| C  | -8.4195 | 2.3774  | -4.7084 | H | -7.1792 | -0.5982 | -4.5338 |
| C  | -6.2943 | -5.5766 | -0.8496 | H | -4.7531 | -1.5677 | -7.3548 |
| C  | -7.7943 | 10.0928 | -3.5841 | H | -0.8098 | -0.5662 | 2.4453  |
| C  | -7.5752 | 3.4365  | -5.4697 | H | -5.1824 | -0.2304 | -6.2563 |
| C  | -6.3087 | -4.2137 | -0.1447 | H | -6.0845 | -3.7292 | -7.3339 |
| C  | -7.6059 | -5.7724 | -1.6370 | H | -7.4285 | -3.9444 | -6.1783 |
| C  | -6.4474 | -3.0792 | -1.1970 | H | -2.5498 | -0.5579 | 5.7486  |
| C  | -5.4894 | 2.5514  | 2.7332  | H | -1.6044 | 0.4435  | 3.6824  |
| C  | -5.8993 | 0.9304  | 0.7708  | H | -8.1328 | -0.9070 | -5.9997 |

|   |          |         |         |            |          |         |         |
|---|----------|---------|---------|------------|----------|---------|---------|
| H | -4.2293  | -5.7229 | 0.5556  | H          | -7.8907  | 7.3014  | -1.5816 |
| H | -5.9841  | 2.0523  | -6.0505 | H          | -8.9288  | 5.4123  | -2.9743 |
| H | -5.4354  | -5.6191 | -1.5354 | H          | -9.4661  | 7.5755  | -0.8591 |
| H | -3.4454  | 3.0962  | 2.1929  | H          | -10.4155 | 5.6323  | -2.0226 |
| H | -6.5144  | 10.5324 | -1.8700 | H          | -4.6020  | 6.2109  | -1.8143 |
| H | -5.3087  | 4.7319  | 2.5181  | H          | 0.1342   | -3.8356 | 3.9324  |
| H | -7.9198  | 11.1563 | -3.8307 | H          | -3.6337  | -0.7673 | -0.0852 |
| H | -9.1417  | 1.9253  | -5.4013 | H          | -0.1019  | -5.9223 | 2.6463  |
| H | -6.2896  | -0.6891 | -7.5752 | H          | -0.1607  | -0.6445 | 5.3931  |
| H | -3.6867  | -1.5126 | 4.7519  | H          | -5.4883  | -4.6819 | -5.4138 |
| H | -5.4104  | 4.1436  | 4.1939  | H          | 0.6052   | -1.6787 | 4.1651  |
| H | -7.5715  | -2.7702 | -7.5082 | H          | -0.1285  | -2.4087 | 5.6179  |
| H | -5.6165  | -3.1829 | -1.9038 | H          | -3.7882  | 4.2901  | -0.9120 |
| H | -3.6299  | 2.5003  | 3.8574  | H          | -3.8063  | -5.5329 | -3.8312 |
| H | -2.5863  | -0.5480 | 2.5683  | H          | -3.3867  | 1.3642  | 0.0158  |
| H | -6.1426  | 3.4667  | -7.1224 | H          | -1.3042  | 1.3368  | -2.2129 |
| H | -8.4423  | -5.8173 | -0.9238 | H          | -2.4303  | 3.6475  | 0.4602  |
| H | -8.9660  | 2.8423  | -3.8787 | H          | -1.2520  | 3.3878  | -0.8413 |
| H | -7.7041  | 9.5520  | -4.5342 | H          | -2.5517  | -3.9328 | -2.3813 |
| H | -6.1797  | -6.3819 | -0.1124 | H          | -2.0142  | -1.8388 | -1.7078 |
| H | -6.8736  | 4.1943  | 3.1803  | H          | -1.5739  | -0.5179 | 0.2201  |
| H | -7.5806  | -6.7323 | -2.1699 | H          | -1.5465  | 1.6858  | 1.7048  |
| H | -3.6771  | 1.3507  | 2.5006  | H          | -0.3532  | -0.6476 | -1.0524 |
| H | -7.3388  | 2.1445  | -7.2077 | H          | 0.5876   | 1.5628  | -0.4954 |
| H | -7.4333  | 6.1677  | -5.0123 | H          | -0.2757  | 2.8881  | 1.4354  |
| H | -5.6630  | 10.4189 | -3.4180 | H          | 0.5418   | 0.5562  | 0.9646  |
| H | -7.7742  | 1.5930  | -4.3112 |            |          |         |         |
| H | -9.9101  | 10.1753 | -3.2184 | 4:         |          |         |         |
| H | -8.9695  | 9.8655  | -1.7649 | -6586.8065 |          |         |         |
| H | -5.8148  | 1.7942  | 4.7478  | Cr         | -3.0288  | -1.5213 | 1.9789  |
| H | -7.1828  | -4.1442 | 0.5177  | Cr         | 1.5815   | -0.9559 | -3.3134 |
| H | -8.0331  | 5.1097  | -6.8201 | Cl         | -4.9830  | -1.9593 | 3.1489  |
| H | -7.9086  | -2.4616 | -2.6887 | Cl         | 2.1697   | 0.2157  | -5.3448 |
| H | -9.2191  | 4.8917  | -5.5026 | N          | -2.8387  | -3.4433 | 1.3654  |
| H | -7.0741  | -4.6479 | -3.4119 | N          | -4.0646  | -1.3797 | 0.2272  |
| H | -7.1814  | -0.7112 | -2.0132 | N          | 2.4134   | 0.5422  | -2.2109 |
| H | -6.7874  | 4.2417  | 0.9754  | N          | 3.4913   | -1.6782 | -3.2857 |
| H | -9.1856  | 3.7601  | -6.8752 | O          | -0.1460  | -0.0417 | -3.2844 |
| H | -7.2748  | 1.7717  | 3.7238  | O          | -1.2801  | -1.2543 | 0.8746  |
| H | -8.8196  | -4.7449 | -3.1253 | O          | -2.1417  | 4.5915  | 0.4984  |
| H | -6.0091  | 0.5473  | 3.4821  | O          | -1.8321  | -1.8871 | 3.4434  |
| H | -10.4587 | 7.9646  | -3.1193 | O          | -1.5979  | 5.0590  | -1.6802 |
| H | -8.8883  | 7.6995  | -3.8754 | O          | -3.1254  | 0.3926  | 2.2082  |
| H | -8.5993  | -3.1421 | -1.2075 | O          | -4.9891  | 4.6423  | -1.7153 |
| H | -7.7580  | 1.4479  | -2.0944 | O          | -6.4952  | 4.1870  | -0.0379 |

|   |         |         |         |   |         |         |         |
|---|---------|---------|---------|---|---------|---------|---------|
| O | 1.0028  | -2.5901 | -4.2044 | C | -5.3561 | 7.7082  | -0.0826 |
| O | 1.2623  | -1.7895 | -1.6129 | C | -6.0090 | 4.9022  | -1.1095 |
| C | 0.0475  | 3.2851  | -1.7236 | C | -6.7931 | 7.1682  | -0.2656 |
| C | 0.3905  | -4.6862 | 2.5458  | C | -6.9109 | 6.0885  | -1.3742 |
| C | -0.8844 | -4.7073 | -3.9696 | C | -0.3578 | -0.1371 | 1.1135  |
| C | 0.2658  | -2.5122 | 4.3675  | C | 0.4565  | 2.0005  | -2.1547 |
| C | -1.0679 | -0.2454 | -0.1670 | C | 1.3620  | -3.3730 | 4.3154  |
| C | 0.1730  | -1.3697 | 5.3959  | C | 1.4442  | -4.4518 | 3.4103  |
| C | -1.2375 | -3.8508 | -2.7250 | C | 1.4170  | -1.3090 | 6.3089  |
| C | -0.4670 | 1.1511  | -2.8623 | C | 0.6354  | -4.9306 | -3.9968 |
| C | -1.3810 | -3.9778 | -5.2441 | C | 1.0869  | -0.5256 | 1.2569  |
| C | -0.7433 | -3.8405 | 2.5354  | C | 1.8150  | 1.6252  | -1.8389 |
| C | -1.6680 | -6.0332 | -3.8514 | C | 1.5082  | -3.7825 | -3.9974 |
| C | -1.0671 | -1.5916 | 6.3033  | C | 1.2022  | -6.2018 | -3.9277 |
| C | -0.8104 | -2.7198 | 3.4332  | C | 2.5933  | -6.4071 | -3.8110 |
| C | 0.0457  | 0.0069  | 4.6934  | C | 2.9110  | -3.9915 | -3.7534 |
| C | -1.2361 | 3.7137  | -1.9632 | C | 3.7760  | 0.1852  | -1.7582 |
| C | -1.8051 | -4.1795 | 1.6163  | C | 3.4274  | -5.3067 | -3.6997 |
| C | -1.8202 | 1.6195  | -3.0627 | C | 3.8321  | -2.9073 | -3.4821 |
| C | -2.0262 | 5.3768  | -0.4205 | C | 4.4448  | -0.6156 | -2.9185 |
| C | -2.1726 | 2.8853  | -2.6035 | C | 4.6602  | 1.3622  | -1.3181 |
| C | -2.2738 | 6.8775  | -0.3516 | C | 5.8577  | -1.0767 | -2.5363 |
| C | -3.8238 | 4.2704  | 4.1535  | C | 6.0793  | 0.8869  | -0.9507 |
| C | -1.9110 | 2.8527  | 3.4318  | C | 6.7270  | 0.1234  | -2.1197 |
| C | -2.3359 | 0.6209  | -5.3116 | H | -0.9834 | -4.3939 | -1.8042 |
| C | -2.9332 | -0.6768 | -3.2366 | H | 0.4236  | -5.5202 | 1.8482  |
| C | -3.7468 | -5.1416 | -0.3281 | H | -0.7709 | 0.5547  | 1.8395  |
| C | -3.0250 | 7.2956  | 0.9199  | H | -0.9751 | -2.5433 | 6.8440  |
| C | -2.8180 | 0.7462  | -3.8424 | H | -0.7081 | -2.8975 | -2.7273 |
| C | -3.9056 | -3.8115 | 0.4175  | H | -1.1527 | -4.5747 | -6.1372 |
| C | -4.9591 | -5.3674 | -1.2541 | H | 0.9363  | 0.2150  | 4.0873  |
| C | -4.0332 | -2.6249 | -0.5781 | H | -0.9020 | -3.0019 | -5.3346 |
| C | -3.4474 | 2.8631  | 3.6398  | H | -1.5025 | -6.6755 | -4.7262 |
| C | -3.9809 | 1.2502  | 1.6896  | H | -1.3794 | -6.5892 | -2.9496 |
| C | -4.1662 | 2.5289  | 2.3232  | H | -1.1318 | -0.7775 | 7.0390  |
| C | -4.5027 | 6.8661  | 0.8864  | H | -0.0499 | 0.7935  | 5.4540  |
| C | -4.7178 | 0.9574  | 0.4909  | H | -1.9299 | 0.3906  | -0.3460 |
| C | -4.2328 | 1.3660  | -3.8380 | H | -2.3127 | -3.6517 | -2.7282 |
| C | -5.2315 | -2.8392 | -1.5174 | H | -1.6926 | -5.1402 | 1.1082  |
| C | -4.6740 | -0.3141 | -0.1863 | H | -1.3252 | 0.2040  | -5.3474 |
| C | -5.1367 | -4.1987 | -2.2409 | H | -2.8265 | -5.1279 | -0.9244 |
| C | -3.8365 | 1.8334  | 4.7331  | H | -1.6336 | 3.5407  | 2.6270  |
| C | -5.0076 | 3.4508  | 1.7118  | H | -1.2914 | 7.3687  | -0.4053 |
| C | -5.5347 | 1.9479  | -0.1062 | H | -3.5167 | 5.0454  | 3.4389  |
| C | -5.6610 | 3.1718  | 0.5028  | H | -2.5334 | 6.8265  | 1.7806  |

|   |         |         |         |             |         |         |         |
|---|---------|---------|---------|-------------|---------|---------|---------|
| H | -2.0115 | -1.2377 | -3.3818 | H           | 1.1427  | -2.7468 | -1.6999 |
| H | -2.4711 | -3.8431 | -5.1840 | H           | 2.3226  | -5.0885 | 3.4021  |
| H | -1.9811 | -1.6057 | 5.7052  | H           | 1.2905  | -0.4819 | 7.0178  |
| H | -3.3035 | 4.4467  | 5.1026  | H           | 0.5545  | -7.0716 | -3.9425 |
| H | -2.7403 | -5.8071 | -3.7886 | H           | 2.3316  | -1.1286 | 5.7286  |
| H | -3.1063 | -2.5896 | -1.1645 | H           | 1.5422  | -2.2374 | 6.8814  |
| H | -1.4203 | 3.1641  | 4.3644  | H           | 1.2528  | -1.0327 | 2.2142  |
| H | -0.8380 | 0.0310  | 4.0566  | H           | 1.3804  | -1.1645 | 0.4162  |
| H | -2.3300 | 1.6077  | -5.7923 | H           | 2.3508  | 2.3530  | -1.2245 |
| H | -5.8657 | -5.4615 | -0.6375 | H           | 1.6934  | 0.3921  | 1.2411  |
| H | -3.1367 | -0.6199 | -2.1640 | H           | 2.9937  | -7.4151 | -3.7720 |
| H | -2.9566 | 8.3855  | 1.0462  | H           | 3.6429  | -0.5159 | -0.9211 |
| H | -3.6671 | -5.9633 | 0.3955  | H           | 4.4874  | 0.0550  | -3.7880 |
| H | -4.9036 | 4.3581  | 4.3323  | H           | 4.2129  | 1.8680  | -0.4539 |
| H | -4.8364 | -6.3091 | -1.8043 | H           | 4.7125  | 2.0909  | -2.1401 |
| H | -1.5687 | 1.8500  | 3.1831  | H           | 4.4969  | -5.4374 | -3.5439 |
| H | -3.0189 | -0.0371 | -5.8684 | H           | 4.8805  | -3.2044 | -3.3911 |
| H | -3.1747 | 3.2725  | -2.7256 | H           | 5.7899  | -1.7917 | -1.7021 |
| H | -2.8141 | 7.1739  | -1.2577 | H           | 6.0251  | 0.2243  | -0.0735 |
| H | -3.7603 | -1.2104 | -3.7270 | H           | 6.3208  | -1.5995 | -3.3828 |
| H | -4.5319 | 5.8093  | 0.6140  | H           | 6.8382  | 0.8037  | -2.9773 |
| H | -4.9383 | 6.9422  | 1.8935  | H           | 6.6974  | 1.7495  | -0.6685 |
| H | -3.2717 | 2.0499  | 5.6506  | H           | 7.7325  | -0.2202 | -1.8428 |
| H | -4.8291 | -3.8328 | 1.0125  |             |         |         |         |
| H | -4.2491 | 2.3398  | -4.3420 |             |         |         |         |
| H | -5.2740 | -2.0423 | -2.2673 |             |         |         |         |
| H | -4.5981 | 1.5067  | -2.8124 |             |         |         |         |
| H | -4.2863 | -4.1788 | -2.9348 |             |         |         |         |
| H | -5.2202 | -0.3415 | -1.1294 |             |         |         |         |
| H | -5.1707 | 4.4225  | 2.1531  |             |         |         |         |
| H | -4.9166 | 0.6933  | -4.3704 |             |         |         |         |
| H | -4.9089 | 1.9039  | 4.9565  |             |         |         |         |
| H | -6.0395 | -4.3507 | -2.8469 |             |         |         |         |
| H | -3.6163 | 0.8142  | 4.4093  |             |         |         |         |
| H | -5.3947 | 8.7392  | 0.2986  |             |         |         |         |
| H | -4.8677 | 7.7539  | -1.0668 |             |         |         |         |
| H | -6.1521 | -2.7939 | -0.9174 |             |         |         |         |
| H | -6.0497 | 1.7364  | -1.0374 |             |         |         |         |
| H | -7.1522 | 6.7446  | 0.6816  |             |         |         |         |
| H | -6.6222 | 6.5136  | -2.3404 |             |         |         |         |
| H | -7.4702 | 7.9891  | -0.5354 |             |         |         |         |
| H | -7.9500 | 5.7424  | -1.4299 |             |         |         |         |
| H | -0.5317 | -0.6605 | -1.0168 |             |         |         |         |
| H | 0.7565  | 3.9345  | -1.2185 |             |         |         |         |
| H | 2.1912  | -3.2146 | 4.9950  |             |         |         |         |
|   |         |         |         | <b>4.1:</b> |         |         |         |
|   |         |         |         | -6586.7986  |         |         |         |
|   |         |         |         | Cr          | 1.3919  | -0.4314 | -3.1091 |
|   |         |         |         | Cr          | -2.8141 | -1.7512 | 2.2813  |
|   |         |         |         | Cl          | 1.9754  | 0.8775  | -5.0197 |
|   |         |         |         | Cl          | -4.7652 | -1.3594 | 3.7150  |
|   |         |         |         | O           | 1.0913  | -1.5726 | -1.4270 |
|   |         |         |         | O           | 0.9463  | -2.0181 | -4.1450 |
|   |         |         |         | O           | -6.1917 | 3.9206  | 0.1854  |
|   |         |         |         | O           | -5.1764 | 4.4218  | -1.8313 |
|   |         |         |         | O           | -2.4762 | 0.1510  | 1.9448  |
|   |         |         |         | O           | -1.9552 | 5.6012  | -2.2503 |
|   |         |         |         | O           | -1.6384 | -1.9995 | 3.8159  |
|   |         |         |         | O           | -1.8889 | 5.6105  | 0.0549  |
|   |         |         |         | O           | -1.4155 | -2.3231 | 1.1011  |
|   |         |         |         | O           | -0.3665 | 0.3235  | -2.9890 |
|   |         |         |         | N           | 3.3290  | -1.0743 | -3.0265 |
|   |         |         |         | N           | 2.0745  | 1.0386  | -1.9096 |
|   |         |         |         | N           | -4.0517 | -1.7430 | 0.6692  |
|   |         |         |         | N           | -3.2571 | -3.7491 | 2.2874  |
|   |         |         |         | C           | 6.3591  | 0.6927  | -1.3310 |

|   |         |         |         |   |         |         |         |
|---|---------|---------|---------|---|---------|---------|---------|
| C | 5.5552  | 1.3541  | -0.1972 | C | -2.1476 | 4.3583  | 3.1833  |
| C | 5.5777  | -0.4789 | -1.9589 | C | -2.7683 | 7.5467  | -1.1532 |
| C | 4.1795  | 1.8359  | -0.6972 | C | -2.3779 | 3.3563  | -3.0073 |
| C | 4.2035  | -0.0123 | -2.4641 | C | -2.1759 | 6.1627  | -1.0090 |
| C | 3.7695  | -2.2260 | -3.4437 | C | -2.0214 | 2.0330  | -3.2504 |
| C | 3.6513  | -4.5210 | -4.2642 | C | -2.5838 | -4.6438 | 2.9405  |
| C | 3.3910  | 0.6791  | -1.3317 | C | -1.5045 | 4.2499  | -2.3710 |
| C | 2.9853  | -3.2949 | -4.0140 | C | 0.8955  | -0.7302 | 4.6153  |
| C | 2.9671  | -5.6042 | -4.7768 | C | -1.0980 | -3.0990 | 4.3037  |
| C | 1.5875  | -5.4819 | -5.0501 | C | -0.8570 | -0.8902 | 6.4517  |
| C | 1.5881  | -3.1643 | -4.3241 | C | -1.2196 | -5.5444 | -5.6406 |
| C | 1.4527  | 2.1564  | -1.6724 | C | -1.5165 | -4.4095 | 3.8847  |
| C | 0.9111  | -2.9815 | 1.1859  | C | -0.8905 | -3.1311 | -6.2394 |
| C | 0.8731  | -4.3035 | -4.8418 | C | -0.7244 | 1.5984  | -2.8182 |
| C | 1.4906  | -1.6744 | 6.8587  | C | -1.4146 | -3.8098 | -3.8502 |
| C | 0.1358  | -5.4417 | 5.3480  | C | 0.3675  | -1.5910 | 5.7980  |
| C | 0.5316  | -4.1562 | 5.7738  | C | -0.2985 | -1.7050 | -0.6720 |
| C | 0.1512  | 2.5241  | -2.1616 | C | -0.0541 | -2.9870 | 5.2941  |
| C | -0.0780 | -1.8785 | 0.8203  | C | -0.6387 | -4.2009 | -5.1407 |
| C | -7.2564 | 5.5308  | -1.1925 | C | -0.8843 | -5.5558 | 4.4234  |
| C | -7.1971 | 6.7621  | -0.2532 | C | -0.2599 | 3.8596  | -1.9397 |
| C | -6.0951 | 4.5799  | -1.0221 | H | 7.3261  | 0.3343  | -0.9563 |
| C | -5.9460 | 7.6506  | -0.4501 | H | 6.1129  | 2.1993  | 0.2247  |
| C | -5.2087 | 2.9444  | 0.5802  | H | 6.5743  | 1.4402  | -2.1086 |
| C | -5.3624 | 1.6349  | 0.1902  | H | 6.1614  | -0.9067 | -2.7829 |
| C | -4.1628 | 3.3393  | 1.4258  | H | 5.4121  | 0.6298  | 0.6180  |
| C | -2.1037 | 2.0492  | 4.1518  | H | 5.4361  | -1.2732 | -1.2109 |
| C | -5.4134 | -4.7729 | -1.3498 | H | 4.8347  | -2.4491 | -3.3535 |
| C | -4.6672 | -0.6955 | 0.2178  | H | 4.7124  | -4.5961 | -4.0365 |
| C | -5.3520 | -3.3060 | -0.8818 | H | 4.3143  | 2.6327  | -1.4430 |
| C | -4.3316 | 1.7466  | -4.3039 | H | 3.6133  | 2.2623  | 0.1394  |
| C | -4.4575 | 0.6606  | 0.6680  | H | 4.3289  | 0.7235  | -3.2706 |
| C | -4.7579 | 7.2548  | 0.4496  | H | 3.1860  | -0.0845 | -0.5672 |
| C | -3.2312 | 2.4225  | 1.9073  | H | 3.4746  | -6.5446 | -4.9645 |
| C | -3.3689 | 1.0407  | 1.5256  | H | 1.9424  | -2.7102 | 0.9186  |
| C | -2.0713 | 2.8554  | 2.8237  | H | 1.9377  | 2.9085  | -1.0492 |
| C | -4.2146 | -3.1082 | 0.1327  | H | 0.6350  | -3.9044 | 0.6597  |
| C | -5.5654 | -5.7299 | -0.1547 | H | 0.8639  | -3.1794 | 2.2598  |
| C | -4.3613 | -4.0681 | 1.3500  | H | 1.1720  | -2.2380 | 7.7443  |
| C | -2.9748 | 1.0707  | -3.9899 | H | 2.3993  | -2.1409 | 6.4578  |
| C | -3.4551 | 8.0197  | 0.1397  | H | 1.0721  | -6.3527 | -5.4374 |
| C | -4.4360 | -5.5313 | 0.8774  | H | 1.7501  | -0.6600 | 7.1838  |
| C | -3.2733 | -0.1818 | -3.1206 | H | 0.6225  | -6.3235 | 5.7525  |
| C | -2.3264 | 0.6296  | -5.3307 | H | 1.4011  | -2.4839 | -1.5910 |
| C | -0.7313 | 2.6065  | 2.0741  | H | 1.3240  | -4.0884 | 6.5098  |

|   |         |         |         |           |         |         |         |
|---|---------|---------|---------|-----------|---------|---------|---------|
| H | 0.3993  | 4.5550  | -1.4333 | H         | -2.0713 | 4.9944  | 2.2969  |
| H | -0.6590 | -2.6313 | -1.1146 | H         | -1.9493 | 8.2272  | -1.4286 |
| H | -8.1807 | 4.9755  | -0.9955 | H         | -0.7074 | 3.1990  | 1.1522  |
| H | -8.1035 | 7.3531  | -0.4399 | H         | -3.4724 | -5.8098 | 0.4252  |
| H | -7.2588 | 5.8557  | -2.2376 | H         | -1.3630 | 0.1466  | -5.1617 |
| H | -7.2518 | 6.4171  | 0.7870  | H         | -2.8221 | -5.7003 | 2.7911  |
| H | -6.1823 | 1.3457  | -0.4599 | H         | -2.4897 | -3.7529 | -4.0646 |
| H | -6.3105 | -3.0283 | -0.4182 | H         | -0.8055 | -0.7964 | -0.9711 |
| H | -5.6470 | 7.6159  | -1.5074 | H         | 1.1838  | 0.2663  | 4.9758  |
| H | -6.2053 | 8.6985  | -0.2398 | H         | -0.5771 | 0.1164  | 6.7894  |
| H | -2.0220 | 0.9786  | 3.9699  | H         | -1.1007 | -6.3426 | -4.8976 |
| H | -6.2464 | -4.9060 | -2.0522 | H         | -0.7526 | -5.8684 | -6.5786 |
| H | -3.0413 | 2.2324  | 4.6911  | H         | -0.5117 | -2.1578 | -5.9259 |
| H | -4.9846 | 1.0191  | -4.8009 | H         | 1.7783  | -1.1992 | 4.1604  |
| H | -4.0973 | 4.3821  | 1.7000  | H         | -0.3947 | -3.4188 | -7.1748 |
| H | -5.4100 | -0.8105 | -0.5748 | H         | -1.0879 | -2.8368 | -3.4834 |
| H | -4.4928 | -5.0165 | -1.9013 | H         | -1.2005 | -1.4632 | 7.3222  |
| H | -4.8326 | 2.0933  | -3.3930 | H         | 0.1303  | -0.9208 | 1.3130  |
| H | -5.2021 | -2.6475 | -1.7465 | H         | -1.2174 | -6.5374 | 4.0906  |
| H | -4.2167 | 2.6040  | -4.9779 | H         | -1.2638 | -4.5618 | -3.0641 |
| H | -5.2909 | -3.7961 | 1.8703  |           |         |         |         |
| H | -1.2700 | 2.3664  | 4.7931  | 5:        |         |         |         |
| H | -5.0417 | 7.4288  | 1.4969  | -6586.835 |         |         |         |
| H | -4.5582 | 6.1816  | 0.3664  | Cr        | -2.8453 | -1.7230 | 2.1963  |
| H | -4.0012 | -0.8220 | -3.6379 | Cr        | 1.4379  | -0.3409 | -2.7524 |
| H | -3.4538 | 7.5337  | -2.0063 | Cl        | -4.2876 | -0.7997 | 3.9056  |
| H | -3.3517 | 3.7356  | -3.2772 | Cl        | 2.3891  | 1.1003  | -4.2885 |
| H | -2.9897 | -0.0768 | -5.8474 | N         | -3.4967 | -3.5682 | 2.7647  |
| H | -0.6314 | 1.5475  | 1.8270  | N         | -4.4793 | -1.7861 | 0.9922  |
| H | -5.5712 | -6.7724 | -0.4994 | N         | 1.7109  | 0.9683  | -1.2581 |
| H | -3.0771 | 4.5947  | 3.7174  | N         | 3.2719  | -1.0125 | -2.1443 |
| H | -4.5995 | -6.1995 | 1.7320  | O         | -0.3633 | 0.2882  | -2.9253 |
| H | -3.6639 | 9.0961  | 0.0643  | O         | -1.9791 | -2.7466 | 0.8139  |
| H | -3.6957 | 0.1158  | -2.1560 | O         | -2.1096 | 5.6527  | -0.1992 |
| H | -6.5363 | -5.5519 | 0.3318  | O         | -1.3319 | -1.8596 | 3.3928  |
| H | -2.1669 | 1.4939  | -5.9868 | O         | -2.1374 | 5.5207  | -2.4857 |
| H | 0.1221  | -0.6166 | 3.8556  | O         | -2.3828 | 0.0306  | 1.4761  |
| H | 0.1145  | 2.9045  | 2.7087  | O         | -4.9908 | 4.5306  | -1.8343 |
| H | -3.2529 | -3.3459 | -0.3438 | O         | -6.0827 | 3.9368  | 0.0964  |
| H | -2.2919 | -5.4197 | -5.8295 | O         | 1.2598  | -1.8340 | -3.9507 |
| H | -1.3126 | 4.6046  | 3.8505  | O         | 0.8094  | -1.6909 | -1.2740 |
| H | -1.6784 | -0.8090 | 5.7382  | C         | -0.4790 | 3.8225  | -1.8794 |
| H | -1.9675 | -3.0449 | -6.4345 | C         | -0.5751 | -5.4096 | 3.9675  |
| H | -2.3655 | -0.7565 | -2.9397 | C         | 0.2624  | -3.6526 | -5.8652 |
| H | -2.7539 | 7.8808  | 0.9704  | C         | 0.6857  | -2.8715 | 4.0961  |

|   |         |         |         |   |         |         |         |
|---|---------|---------|---------|---|---------|---------|---------|
| C | -0.5653 | -1.7749 | -0.7866 | C | 1.3694  | -4.0485 | 4.3954  |
| C | 1.3453  | -1.4830 | 4.2269  | C | 0.7584  | -5.3191 | 4.3323  |
| C | -0.9251 | -3.5767 | -4.8655 | C | 2.8305  | -1.5866 | 4.6374  |
| C | -0.7898 | 1.5258  | -2.7439 | C | 1.5871  | -3.8662 | -5.1110 |
| C | 0.3145  | -2.3407 | -6.6959 | C | -0.0725 | -4.0588 | 0.2078  |
| C | -1.3236 | -4.2587 | 3.6297  | C | 1.1069  | 2.1123  | -1.1901 |
| C | -0.0298 | -4.8084 | -6.8480 | C | 2.0253  | -2.8785 | -4.1580 |
| C | 0.6096  | -0.6598 | 5.3185  | C | 2.3871  | -4.9881 | -5.3107 |
| C | -0.6936 | -2.9640 | 3.6855  | C | 3.6045  | -5.1908 | -4.6218 |
| C | 1.2963  | -0.6910 | 2.8927  | C | 3.2696  | -3.0746 | -3.4608 |
| C | -1.6595 | 4.1859  | -2.4826 | C | 2.7574  | 0.5292  | -0.3211 |
| C | -2.7082 | -4.4689 | 3.2434  | C | 4.0339  | -4.2422 | -3.7134 |
| C | -2.0740 | 1.9102  | -3.2632 | C | 3.8148  | -2.1302 | -2.5095 |
| C | -2.3990 | 6.1182  | -1.2839 | C | 3.9059  | -0.0840 | -1.1742 |
| C | -2.4612 | 3.2400  | -3.1387 | C | 3.2736  | 1.5824  | 0.6650  |
| C | -3.0606 | 7.4665  | -1.5114 | C | 4.9820  | -0.6895 | -0.2575 |
| C | -1.8312 | 4.1773  | 2.8275  | C | 4.3532  | 0.9633  | 1.5747  |
| C | -0.5230 | 2.4738  | 1.5479  | C | 5.5010  | 0.3683  | 0.7385  |
| C | -2.3509 | 0.2602  | -5.1753 | H | -0.9775 | -4.4950 | -4.2647 |
| C | -3.3037 | -0.2628 | -2.8854 | H | -1.0681 | -6.3794 | 3.9243  |
| C | -5.3109 | -5.2893 | 2.2459  | H | -0.0381 | -2.1795 | 1.2410  |
| C | -3.5778 | 8.0739  | -0.1978 | H | 0.6989  | -1.1583 | 6.2930  |
| C | -3.0033 | 0.8666  | -3.9058 | H | -0.8184 | -2.7158 | -4.2032 |
| C | -4.8685 | -3.8200 | 2.2907  | H | 1.0962  | -2.4082 | -7.4643 |
| C | -6.7413 | -5.4082 | 1.6850  | H | 1.8140  | -1.2518 | 2.1031  |
| C | -4.9790 | -3.1652 | 0.8696  | H | 0.5177  | -1.4786 | -6.0576 |
| C | -1.8028 | 2.6947  | 2.3895  | H | 0.7616  | -4.8974 | -7.6036 |
| C | -3.2945 | 0.9455  | 1.2170  | H | -0.1273 | -5.7688 | -6.3250 |
| C | -3.0395 | 2.3236  | 1.5488  | H | 1.0643  | 0.3386  | 5.3904  |
| C | -4.8208 | 7.3267  | 0.3257  | H | 1.8035  | 0.2749  | 3.0262  |
| C | -4.5428 | 0.6047  | 0.5859  | H | -0.8726 | -0.7539 | -0.5680 |
| C | -4.3609 | 1.4866  | -4.3072 | H | -1.8639 | -3.4760 | -5.4271 |
| C | -6.3970 | -3.3074 | 0.3028  | H | -3.0659 | -5.4959 | 3.3629  |
| C | -5.0072 | -0.7588 | 0.4181  | H | -1.4104 | -0.2363 | -4.9285 |
| C | -6.8305 | -4.7851 | 0.2797  | H | -4.6155 | -5.8520 | 1.6048  |
| C | -1.7245 | 1.8374  | 3.6815  | H | -0.5433 | 3.1391  | 0.6803  |
| C | -3.9494 | 3.2921  | 1.1254  | H | -2.3238 | 8.1256  | -1.9923 |
| C | -5.4238 | 1.6248  | 0.1669  | H | -1.7956 | 4.8555  | 1.9702  |
| C | -5.1135 | 2.9409  | 0.4274  | H | -2.7760 | 8.0254  | 0.5481  |
| C | -6.0943 | 7.6952  | -0.4627 | H | -2.3866 | -0.7774 | -2.6020 |
| C | -5.9425 | 4.6170  | -1.0814 | H | -0.6531 | -2.1940 | -7.1957 |
| C | -7.2481 | 6.6824  | -0.3018 | H | -0.4462 | -0.5486 | 5.0645  |
| C | -7.1530 | 5.5044  | -1.3019 | H | -0.9549 | 4.3679  | 3.4606  |
| C | -0.6457 | -2.6542 | 0.4592  | H | -0.9748 | -4.6002 | -7.3646 |
| C | -0.0317 | 2.4855  | -1.9895 | H | -4.2585 | -3.6905 | 0.2281  |





|   |         |         |         |   |         |         |         |
|---|---------|---------|---------|---|---------|---------|---------|
| C | -1.1701 | -3.1281 | -6.3163 | C | 1.2337  | -3.2840 | -4.3279 |
| C | -1.1866 | -3.9837 | 3.9314  | C | 1.6043  | -5.3478 | -5.5719 |
| C | -1.1544 | -5.6244 | -6.3333 | C | 2.9750  | -5.3508 | -5.2250 |
| C | 0.4301  | -0.1865 | 5.7966  | C | 2.6146  | -3.3249 | -3.9189 |
| C | -0.5823 | -2.6995 | 4.1784  | C | 2.1964  | -0.1405 | -0.2897 |
| C | 1.8259  | -0.8602 | 3.7889  | C | 3.4623  | -4.3512 | -4.4041 |
| C | -2.2479 | 3.6952  | -1.9270 | C | 3.1902  | -2.3902 | -2.9848 |
| C | -2.1596 | -4.2139 | 2.8904  | C | 3.2335  | -0.5747 | -1.3645 |
| C | -2.5786 | 1.6439  | -3.2192 | C | 2.7767  | 0.9014  | 0.6755  |
| C | -2.2703 | 5.9382  | -0.9203 | C | 4.5054  | -1.1116 | -0.6875 |
| C | -2.9163 | 2.9579  | -2.9195 | C | 4.0604  | 0.3605  | 1.3328  |
| C | -2.8217 | 7.3199  | -1.2456 | C | 5.0932  | -0.0556 | 0.2705  |
| C | -1.9574 | 4.6504  | 3.3885  | C | 0.1336  | -3.4254 | -0.5075 |
| C | -0.3274 | 3.0050  | 2.4662  | C | 1.3426  | -4.2527 | -0.9403 |
| C | -2.2018 | 0.5630  | -5.4590 | C | 0.3300  | -2.8600 | 0.9352  |
| C | -3.9056 | -0.4235 | -3.8776 | H | -1.4308 | -5.3667 | -3.6472 |
| C | -3.5067 | -5.1374 | 0.4425  | H | -1.2412 | -6.0709 | 4.4839  |
| C | -3.4331 | 7.9805  | 0.0059  | H | 0.0965  | -0.4738 | 6.8026  |
| C | -3.2607 | 0.8931  | -4.3740 | H | -1.3815 | -3.5854 | -3.5377 |
| C | -3.5386 | -3.6867 | 0.9523  | H | -0.6182 | -3.1110 | -7.2655 |
| C | -4.5832 | -5.3546 | -0.6411 | H | 2.4866  | -1.6330 | 3.3729  |
| C | -3.3401 | -2.6995 | -0.2336 | H | -0.9505 | -2.2162 | -5.7600 |
| C | -1.7791 | 3.1687  | 2.9910  | H | -0.6292 | -5.6273 | -7.2974 |
| C | -2.7819 | 1.3936  | 1.4147  | H | -0.9182 | -6.5553 | -5.8014 |
| C | -2.7952 | 2.7348  | 1.9227  | H | 1.0127  | 0.7425  | 5.8750  |
| C | -4.7143 | 7.2641  | 0.4686  | H | 2.4008  | 0.0712  | 3.8829  |
| C | -3.7449 | 1.0192  | 0.4218  | H | -2.6866 | -4.3912 | -4.4521 |
| C | -4.3783 | 1.7349  | -5.0275 | H | -2.5496 | -5.2339 | 2.8510  |
| C | -4.4523 | -2.8986 | -1.2719 | H | -1.3742 | -0.0115 | -5.0378 |
| C | -3.8125 | -0.3103 | -0.1375 | H | -2.5093 | -5.3371 | 0.0253  |
| C | -4.4250 | -4.3478 | -1.7928 | H | -0.1565 | 3.6750  | 1.6150  |
| C | -1.9652 | 2.3025  | 4.2643  | H | -1.9802 | 7.9270  | -1.6076 |
| C | -3.7794 | 3.6047  | 1.4602  | H | -1.8315 | 5.3081  | 2.5203  |
| C | -4.7024 | 1.9454  | -0.0422 | H | -2.6814 | 7.9525  | 0.8043  |
| C | -4.7210 | 3.2153  | 0.4960  | H | -3.1489 | -1.0508 | -3.4030 |
| C | -5.9077 | 7.4801  | -0.4827 | H | -2.2461 | -3.1640 | -6.5388 |
| C | -6.2024 | 4.3772  | -1.0478 | H | -0.4446 | -0.0019 | 5.1726  |
| C | -7.1460 | 6.6198  | -0.1183 | H | -1.1983 | 4.9059  | 4.1386  |
| C | -7.3335 | 5.3955  | -1.0380 | H | -2.2335 | -5.6009 | -6.5291 |
| C | -0.8233 | 1.8036  | -1.4943 | H | -2.3788 | -2.9017 | -0.7203 |
| C | 0.9289  | -3.7753 | 5.7550  | H | 0.3762  | 3.2760  | 3.2657  |
| C | 0.2741  | -5.0167 | 5.5865  | H | 0.9935  | -0.6966 | 3.1012  |
| C | 2.5673  | -1.4414 | 6.0968  | H | -1.7955 | 1.4896  | -5.8827 |
| C | 0.7221  | -4.3584 | -5.1482 | H | -5.5777 | -5.2314 | -0.1852 |
| C | 0.3186  | 1.3270  | -0.7572 | H | -4.7092 | -0.2041 | -3.1607 |

|   |         |         |         |            |         |         |         |
|---|---------|---------|---------|------------|---------|---------|---------|
| H | -3.6516 | 9.0367  | -0.2092 | H          | 4.2727  | -2.4808 | -2.8607 |
| H | -3.6745 | -5.8441 | 1.2638  | H          | 4.2458  | -2.0213 | -0.1255 |
| H | -2.9463 | 4.8261  | 3.8329  | H          | 3.8064  | -0.5109 | 1.9505  |
| H | -4.5226 | -6.3836 | -1.0194 | H          | 5.2592  | -1.3863 | -1.4347 |
| H | -0.1459 | 1.9705  | 2.1681  | H          | 5.3905  | 0.8289  | -0.3121 |
| H | -2.6717 | -0.0187 | -6.2649 | H          | 4.4836  | 1.1188  | 2.0043  |
| H | -3.7185 | 3.4565  | -3.4432 | H          | 5.9981  | -0.4518 | 0.7500  |
| H | -3.5512 | 7.2455  | -2.0561 | H          | -0.7358 | -4.1080 | -0.4743 |
| H | -4.3429 | -0.9632 | -4.7294 | H          | 1.2225  | -4.6052 | -1.9681 |
| H | -4.5129 | 6.1923  | 0.5613  | H          | 1.4479  | -5.1241 | -0.2774 |
| H | -4.9979 | 7.6165  | 1.4711  | H          | 2.2580  | -3.6576 | -0.8829 |
| H | -1.2211 | 2.5978  | 5.0176  | H          | 1.3853  | -2.6350 | 1.1351  |
| H | -4.5236 | -3.4667 | 1.3894  | H          | -0.0303 | -3.5406 | 1.7022  |
| H | -3.9711 | 2.6461  | -5.4839 | H          | -0.5498 | -1.4805 | -0.0339 |
| H | -4.3116 | -2.2107 | -2.1073 |            |         |         |         |
| H | -5.1423 | 2.0257  | -4.2947 |            |         |         |         |
| H | -3.4683 | -4.5216 | -2.3025 |            |         |         |         |
| H | -4.4432 | -0.4142 | -1.0195 |            |         |         |         |
| H | -3.8376 | 4.6132  | 1.8443  |            |         |         |         |
| H | -4.8553 | 1.1404  | -5.8171 |            |         |         |         |
| H | -2.9690 | 2.4542  | 4.6805  |            |         |         |         |
| H | -5.2193 | -4.4908 | -2.5366 |            |         |         |         |
| H | -1.8425 | 1.2429  | 4.0360  |            |         |         |         |
| H | -6.1730 | 8.5474  | -0.4668 |            |         |         |         |
| H | -5.6033 | 7.2523  | -1.5143 |            |         |         |         |
| H | -5.4267 | -2.6800 | -0.8096 |            |         |         |         |
| H | -5.4119 | 1.6505  | -0.8037 |            |         |         |         |
| H | -7.0668 | 6.2803  | 0.9217  |            |         |         |         |
| H | -7.4699 | 5.7163  | -2.0763 |            |         |         |         |
| H | -8.0593 | 7.2248  | -0.1933 |            |         |         |         |
| H | -8.2443 | 4.8550  | -0.7387 |            |         |         |         |
| H | -0.6925 | 3.6898  | -0.4487 |            |         |         |         |
| H | 1.7683  | -3.7301 | 6.4389  |            |         |         |         |
| H | 0.6004  | -5.8837 | 6.1515  |            |         |         |         |
| H | 3.0984  | -0.4819 | 6.1163  |            |         |         |         |
| H | 1.2352  | -6.1581 | -6.1914 |            |         |         |         |
| H | 3.2548  | -2.2083 | 5.7164  |            |         |         |         |
| H | 2.2883  | -1.6993 | 7.1267  |            |         |         |         |
| H | 0.6424  | 1.9763  | 0.0549  |            |         |         |         |
| H | 3.6258  | -6.1387 | -5.5909 |            |         |         |         |
| H | 1.9464  | -1.0306 | 0.2924  |            |         |         |         |
| H | 3.4688  | 0.3123  | -1.9690 |            |         |         |         |
| H | 2.0367  | 1.1381  | 1.4487  |            |         |         |         |
| H | 2.9994  | 1.8260  | 0.1232  |            |         |         |         |
| H | 4.5070  | -4.3469 | -4.0987 |            |         |         |         |
|   |         |         |         | <b>6:</b>  |         |         |         |
|   |         |         |         | -6586.7947 |         |         |         |
|   |         |         |         | Cr         | 1.1198  | -0.8014 | -2.6614 |
|   |         |         |         | Cr         | -2.5076 | -1.5441 | 1.7741  |
|   |         |         |         | Cl         | 2.3726  | -0.1629 | -4.6252 |
|   |         |         |         | Cl         | -4.3523 | -1.5031 | 3.1043  |
|   |         |         |         | O          | 0.9955  | -0.1303 | 1.1588  |
|   |         |         |         | O          | -0.0019 | -1.1498 | -1.1009 |
|   |         |         |         | O          | 0.6040  | -2.5145 | -3.4321 |
|   |         |         |         | O          | -5.8708 | 4.2035  | 0.3314  |
|   |         |         |         | O          | -5.8966 | 4.0643  | -1.9622 |
|   |         |         |         | O          | -2.1580 | 0.3180  | 1.6620  |
|   |         |         |         | O          | -2.7210 | 4.9379  | -1.6863 |
|   |         |         |         | O          | -1.1945 | -1.9076 | 3.1044  |
|   |         |         |         | O          | -1.5546 | 5.6430  | 0.1679  |
|   |         |         |         | O          | -0.3933 | 0.2112  | -3.3243 |
|   |         |         |         | N          | 2.8908  | -1.6120 | -2.0258 |
|   |         |         |         | N          | 1.8249  | 0.8400  | -1.6798 |
|   |         |         |         | N          | -3.5816 | -1.4075 | 0.0596  |
|   |         |         |         | N          | -2.6661 | -3.5268 | 1.3724  |
|   |         |         |         | C          | 1.1995  | -1.5348 | 0.9361  |
|   |         |         |         | C          | 0.3408  | -3.5102 | -0.4107 |
|   |         |         |         | C          | 0.1244  | -2.0423 | -0.0385 |
|   |         |         |         | C          | 5.9594  | 0.1907  | -0.4437 |
|   |         |         |         | C          | 5.2254  | 1.4470  | 0.0700  |
|   |         |         |         | C          | 4.9907  | -0.9932 | -0.6634 |
|   |         |         |         | C          | 4.0381  | 1.8196  | -0.8420 |
|   |         |         |         | C          | 3.8562  | -0.5579 | -1.6094 |
|   |         |         |         | C          | 3.3327  | -2.7780 | -2.3840 |
|   |         |         |         | C          | 3.2496  | -5.0604 | -3.2299 |

|   |         |         |         |   |         |         |         |
|---|---------|---------|---------|---|---------|---------|---------|
| C | 3.0913  | 0.6119  | -0.9508 | C | -0.6130 | -3.0219 | 3.4914  |
| C | 2.5932  | -3.8165 | -3.0549 | C | -0.6650 | -1.1323 | 5.9405  |
| C | 2.6243  | -6.1163 | -3.8640 | C | -1.3437 | -5.8460 | -5.4420 |
| C | 1.3090  | -5.9412 | -4.3515 | C | -0.9153 | -4.2907 | 2.8892  |
| C | 1.2578  | -3.6330 | -3.5625 | C | -0.8677 | -3.4217 | -5.8086 |
| C | 1.1122  | 1.8930  | -1.4331 | C | -0.9395 | 1.2642  | -2.7857 |
| C | 0.6113  | -4.7443 | -4.2228 | C | -1.7866 | -4.2208 | -3.5962 |
| C | 1.7064  | -1.7885 | 6.3748  | C | 0.6424  | -1.6293 | 5.2647  |
| C | 0.7678  | -5.3797 | 4.2675  | C | 0.3718  | -2.9611 | 4.5402  |
| C | 1.0350  | -4.1378 | 4.8844  | C | -0.8177 | -4.5650 | -4.7589 |
| C | -0.2234 | 2.1503  | -1.9076 | C | -0.2075 | -5.4504 | 3.2923  |
| C | -7.4131 | 5.5793  | -0.8320 | C | -0.8074 | 3.3668  | -1.4801 |
| C | -7.2170 | 6.7135  | 0.1979  | H | 0.4992  | 0.1388  | 0.3556  |
| C | -6.2967 | 4.5514  | -0.9235 | H | 1.1584  | -2.0461 | 1.9004  |
| C | -5.9833 | 7.6036  | -0.0955 | H | 2.1842  | -1.7142 | 0.4746  |
| C | -4.8812 | 3.2038  | 0.5150  | H | 1.2972  | -3.6340 | -0.9207 |
| C | -4.9418 | 1.9702  | -0.0922 | H | 0.3420  | -4.1305 | 0.4935  |
| C | -3.8852 | 3.5013  | 1.4586  | H | -0.4487 | -3.8503 | -1.0873 |
| C | -1.9137 | 1.9690  | 4.0973  | H | -0.8441 | -2.0012 | 0.5283  |
| C | -5.2045 | -4.2078 | -2.1036 | H | 6.7523  | -0.0995 | 0.2586  |
| C | -4.1516 | -0.3115 | -0.3390 | H | 5.9278  | 2.2878  | 0.1436  |
| C | -5.0508 | -2.7969 | -1.5023 | H | 6.4418  | 0.4268  | -1.4041 |
| C | -4.6086 | 0.9896  | -4.0282 | H | 5.5497  | -1.8419 | -1.0733 |
| C | -4.0164 | 0.9743  | 0.2923  | H | 4.8415  | 1.2494  | 1.0817  |
| C | -4.7435 | 7.2364  | 0.7462  | H | 4.5519  | -1.3120 | 0.2932  |
| C | -2.9327 | 2.5641  | 1.8466  | H | 4.3784  | -3.0318 | -2.1890 |
| C | -3.0163 | 1.2485  | 1.2798  | H | 4.2627  | -5.1686 | -2.8473 |
| C | -1.8336 | 2.9074  | 2.8637  | H | 4.3913  | 2.0878  | -1.8475 |
| C | -3.7771 | -2.6981 | -0.6442 | H | 3.5180  | 2.6888  | -0.4249 |
| C | -5.1616 | -5.3003 | -1.0202 | H | 4.2860  | -0.1822 | -2.5486 |
| C | -3.7940 | -3.7970 | 0.4520  | H | 2.7971  | 0.3151  | 0.0640  |
| C | -3.1045 | 0.6340  | -4.0259 | H | 3.1302  | -7.0675 | -3.9950 |
| C | -3.4532 | 7.8932  | 0.2235  | H | 1.5115  | 2.6629  | -0.7677 |
| C | -3.8712 | -5.1930 | -0.1807 | H | 1.3875  | -2.5081 | 7.1409  |
| C | -2.9549 | -0.8566 | -3.6061 | H | 2.6707  | -2.1150 | 5.9625  |
| C | -2.5613 | 0.7814  | -5.4726 | H | 0.8372  | -6.7812 | -4.8490 |
| C | -0.4458 | 2.7607  | 2.1870  | H | 1.8543  | -0.8144 | 6.8566  |
| C | -1.9597 | 4.3619  | 3.3684  | H | 1.3173  | -6.2650 | 4.5698  |
| C | -2.9562 | 7.1984  | -1.0572 | H | 1.7872  | -4.1100 | 5.6631  |
| C | -2.8459 | 2.7780  | -2.6539 | H | -0.2373 | 4.0397  | -0.8563 |
| C | -2.3280 | 5.8434  | -0.7553 | H | -8.3325 | 5.0262  | -0.5872 |
| C | -2.3102 | 1.5798  | -3.1091 | H | -8.1309 | 7.3225  | 0.1885  |
| C | -1.9394 | -4.4667 | 1.8909  | H | -7.5377 | 5.9952  | -1.8375 |
| C | -2.0914 | 3.6755  | -1.8731 | H | -7.1301 | 6.2780  | 1.2012  |
| C | 1.1564  | -0.5461 | 4.2819  | H | -5.6898 | 1.7552  | -0.8443 |

|   |         |         |         |           |         |         |         |
|---|---------|---------|---------|-----------|---------|---------|---------|
| H | -5.9160 | -2.5607 | -0.8653 | H         | 1.3123  | 0.3900  | 4.8361  |
| H | -5.7395 | 7.5330  | -1.1658 | H         | -0.4639 | -0.1864 | 6.4615  |
| H | -6.2279 | 8.6588  | 0.0942  | H         | -1.3602 | -6.6958 | -4.7465 |
| H | -1.7396 | 0.9301  | 3.8154  | H         | -0.7245 | -6.1145 | -6.3078 |
| H | -6.1462 | -4.2655 | -2.6644 | H         | -0.5578 | -2.4747 | -5.3645 |
| H | -2.8984 | 2.0468  | 4.5774  | H         | 2.1152  | -0.8496 | 3.8418  |
| H | -5.1510 | 0.2564  | -4.6381 | H         | -0.2034 | -3.6541 | -6.6507 |
| H | -3.8780 | 4.4928  | 1.8881  | H         | -1.4464 | -3.3293 | -3.0654 |
| H | -4.8086 | -0.3333 | -1.2073 | H         | -1.0176 | -1.8688 | 6.6751  |
| H | -4.3899 | -4.3838 | -2.8139 | H         | -0.4498 | -6.3981 | 2.8165  |
| H | -5.0239 | 0.9845  | -3.0120 | H         | -1.8579 | -5.0636 | -2.8936 |
| H | -5.0168 | -2.0646 | -2.3147 |           |         |         |         |
| H | -4.7859 | 1.9840  | -4.4544 | 7:        |         |         |         |
| H | -4.6981 | -3.6255 | 1.0550  | -6779.897 |         |         |         |
| H | -1.1454 | 2.2711  | 4.8226  | Cr        | 1.4814  | -1.3681 | -3.1245 |
| H | -4.9259 | 7.5337  | 1.7887  | Cr        | -3.1954 | -1.2780 | 2.4463  |
| H | -4.6114 | 6.1503  | 0.7491  | Cl        | 1.9863  | -0.3450 | -5.2639 |
| H | -3.7484 | -1.4500 | -4.0834 | Cl        | -4.9884 | -2.2445 | 3.5536  |
| H | -3.7630 | 7.0701  | -1.7850 | O         | 3.0797  | -2.2552 | 0.5231  |
| H | -3.8645 | 3.0649  | -2.8775 | O         | 1.1380  | -1.9566 | -1.3170 |
| H | -3.0853 | 0.0817  | -6.1399 | O         | 0.7193  | -2.9143 | -3.9985 |
| H | -0.2747 | 1.7307  | 1.8716  | O         | -6.8181 | 4.1192  | -0.1291 |
| H | -5.2254 | -6.2945 | -1.4807 | O         | -5.1467 | 4.1787  | -1.7104 |
| H | -2.9185 | 4.5250  | 3.8798  | O         | -3.7565 | 0.5336  | 2.7773  |
| H | -3.8712 | -5.9676 | 0.5964  | O         | -1.3105 | 4.7915  | -1.3813 |
| H | -3.6321 | 8.9588  | 0.0208  | O         | -1.9388 | -1.3735 | 3.9022  |
| H | -3.0185 | -0.9676 | -2.5219 | O         | -2.3429 | 4.0795  | 0.5368  |
| H | -6.0298 | -5.1894 | -0.3534 | O         | -0.1885 | -0.3618 | -3.0916 |
| H | -2.7195 | 1.8043  | -5.8386 | O         | -1.6486 | -0.5299 | 1.2408  |
| H | 0.4535  | -0.3596 | 3.4712  | N         | 3.3445  | -2.1805 | -3.2423 |
| H | 0.3368  | 3.0372  | 2.9071  | N         | 2.5004  | 0.1633  | -2.2337 |
| H | -2.8931 | -2.8567 | -1.2789 | N         | -4.2011 | -1.3176 | 0.6774  |
| H | -2.3680 | -5.6681 | -5.7935 | N         | -2.5316 | -3.0684 | 1.7785  |
| H | -1.1535 | 4.5494  | 4.0881  | C         | 2.5655  | -3.4284 | -0.1029 |
| H | -1.4475 | -0.9651 | 5.1982  | C         | 0.5534  | -4.3759 | -1.3003 |
| H | -1.8948 | -3.3257 | -6.1883 | C         | 1.1355  | -3.1496 | -0.5945 |
| H | -1.9863 | -1.2519 | -3.9067 | C         | 6.7853  | -0.5138 | -2.5134 |
| H | -2.6602 | 7.8269  | 0.9783  | C         | 6.2930  | 0.5026  | -1.4686 |
| H | -1.8623 | 5.0768  | 2.5435  | C         | 5.7986  | -1.6920 | -2.6532 |
| H | -2.1754 | 7.8055  | -1.5386 | C         | 4.8754  | 1.0062  | -1.8037 |
| H | -0.3881 | 3.4321  | 1.3237  | C         | 4.4019  | -1.1642 | -3.0183 |
| H | -2.9926 | -5.3539 | -0.8216 | C         | 3.6143  | -3.3618 | -3.6990 |
| H | -1.4913 | 0.5527  | -5.4868 | C         | 3.1720  | -5.5913 | -4.5793 |
| H | -2.0929 | -5.4984 | 1.5689  | C         | 3.9063  | -0.1822 | -1.9256 |
| H | -2.7819 | -4.0242 | -4.0148 | C         | 2.6628  | -4.3233 | -4.2039 |

|   |         |         |         |   |         |         |         |
|---|---------|---------|---------|---|---------|---------|---------|
| C | 2.3562  | -6.5459 | -5.1563 | C | -1.7150 | -5.7772 | -6.2074 |
| C | 1.0050  | -6.2253 | -5.4184 | C | -0.4162 | -3.0007 | 2.9719  |
| C | 1.2694  | -4.0224 | -4.4119 | C | -1.0167 | -3.3797 | -6.3676 |
| C | 1.9661  | 1.2841  | -1.8783 | C | -0.4129 | 0.8608  | -2.7081 |
| C | 0.4443  | -4.9958 | -5.0868 | C | -1.8458 | -4.3262 | -4.1832 |
| C | 1.0124  | -0.2961 | 6.9553  | C | -0.1609 | -0.5630 | 5.9872  |
| C | 1.8414  | -3.1207 | 3.8678  | C | 0.2202  | -1.5677 | 4.8841  |
| C | 1.4914  | -2.1406 | 4.8183  | C | -1.0058 | -4.6331 | -5.4498 |
| C | 0.5932  | 1.6843  | -2.0821 | C | 0.8817  | -3.5607 | 2.9759  |
| C | -6.8007 | 5.9522  | -1.6288 | C | 0.2541  | 2.9782  | -1.6183 |
| C | -6.6003 | 7.0740  | -0.5751 | C | -1.5513 | 0.8595  | 0.7138  |
| C | -6.1442 | 4.6561  | -1.2092 | C | -0.5763 | 0.3854  | 1.7161  |
| C | -5.1179 | 7.3785  | -0.2526 | C | 0.8083  | -0.0354 | 1.3158  |
| C | -6.1354 | 3.1142  | 0.6070  | H | -0.7361 | 0.6843  | 2.7471  |
| C | -5.9028 | 1.8619  | 0.0939  | H | 2.5356  | -1.5617 | 0.1004  |
| C | -5.6567 | 3.4775  | 1.8748  | H | 2.5880  | -4.2472 | 0.6295  |
| C | -4.5874 | 2.1178  | 5.1159  | H | 3.1854  | -3.7139 | -0.9668 |
| C | -4.5822 | -4.2259 | -1.8617 | H | 1.2478  | -4.7880 | -2.0376 |
| C | -4.9013 | -0.3384 | 0.2038  | H | 0.3338  | -5.1616 | -0.5609 |
| C | -5.0462 | -3.0012 | -1.0515 | H | -0.3683 | -4.1035 | -1.8200 |
| C | -4.1576 | 1.3449  | -3.7079 | H | 0.5261  | -2.9638 | 0.3068  |
| C | -5.1390 | 0.9345  | 0.8417  | H | 7.7804  | -0.8890 | -2.2407 |
| C | -4.5353 | 6.4685  | 0.8457  | H | 6.9873  | 1.3508  | -1.4041 |
| C | -4.8726 | 2.6212  | 2.6370  | H | 6.8779  | -0.0125 | -3.4884 |
| C | -4.5782 | 1.3136  | 2.1093  | H | 6.1686  | -2.3782 | -3.4237 |
| C | -4.2363 | 3.0856  | 3.9570  | H | 6.2714  | 0.0185  | -0.4812 |
| C | -3.9062 | -2.5202 | -0.1427 | H | 5.7331  | -2.2476 | -1.7065 |
| C | -4.0796 | -5.3582 | -0.9469 | H | 4.6560  | -3.6876 | -3.7597 |
| C | -3.4725 | -3.6620 | 0.8124  | H | 4.2270  | -5.7969 | -4.4068 |
| C | -2.8124 | 0.5895  | -3.6228 | H | 4.8771  | 1.5610  | -2.7524 |
| C | -3.0761 | 6.7869  | 1.2127  | H | 4.5470  | 1.6940  | -1.0154 |
| C | -2.9681 | -4.8615 | -0.0005 | H | 4.4518  | -0.6007 | -3.9609 |
| C | -3.0762 | -0.7350 | -2.8658 | H | 3.9152  | -0.7389 | -0.9814 |
| C | -2.3375 | 0.2737  | -5.0651 | H | 2.7468  | -7.5204 | -5.4317 |
| C | -2.6968 | 3.1629  | 3.7732  | H | 2.5776  | 2.0346  | -1.3711 |
| C | -4.7141 | 4.4977  | 4.3637  | H | 1.3449  | -1.2208 | 7.4440  |
| C | -2.0939 | 6.4659  | 0.0783  | H | 1.8685  | 0.1522  | 6.4338  |
| C | -2.0176 | 2.6903  | -2.4093 | H | 0.3914  | -6.9713 | -5.9101 |
| C | -1.9657 | 4.9748  | -0.1937 | H | 0.6766  | 0.4031  | 7.7313  |
| C | -1.7419 | 1.4152  | -2.8899 | H | 2.8495  | -3.5178 | 3.8364  |
| C | -1.3548 | -3.5456 | 2.0186  | H | 2.2491  | -1.8294 | 5.5277  |
| C | -1.0242 | 3.4553  | -1.7761 | H | 1.0104  | 3.5970  | -1.1444 |
| C | -0.5901 | 0.7987  | 5.3859  | H | -7.8751 | 5.7822  | -1.7700 |
| C | -0.7566 | -1.9636 | 3.9046  | H | -7.0899 | 7.9769  | -0.9636 |
| C | -1.3376 | -1.1376 | 6.8213  | H | -6.3579 | 6.2527  | -2.5835 |

|   |         |         |         |            |         |         |         |
|---|---------|---------|---------|------------|---------|---------|---------|
| H | -7.1224 | 6.7885  | 0.3475  | H          | -1.0113 | -4.4277 | 1.4759  |
| H | -6.2618 | 1.5957  | -0.8939 | H          | -2.8777 | -4.1076 | -4.4895 |
| H | -5.9128 | -3.2534 | -0.4237 | H          | -0.7917 | 1.5108  | 6.1979  |
| H | -4.5245 | 7.2889  | -1.1741 | H          | -1.6185 | -0.4174 | 7.6027  |
| H | -5.0275 | 8.4233  | 0.0806  | H          | -1.7845 | -6.6851 | -5.5931 |
| H | -4.2601 | 1.1017  | 4.8910  | H          | -1.1889 | -6.0227 | -7.1387 |
| H | -5.4025 | -4.5865 | -2.4957 | H          | -0.5348 | -2.5325 | -5.8751 |
| H | -5.6720 | 2.1090  | 5.2865  | H          | 0.2091  | 1.2120  | 4.7555  |
| H | -4.8835 | 0.7112  | -4.2332 | H          | -0.4882 | -3.5929 | -7.3058 |
| H | -5.8806 | 4.4740  | 2.2250  | H          | -1.4377 | -3.4611 | -3.6585 |
| H | -5.3547 | -0.4384 | -0.7834 | H          | -1.0342 | -2.0754 | 7.3050  |
| H | -3.7690 | -3.9155 | -2.5276 | H          | 1.1167  | -4.3242 | 2.2403  |
| H | -4.5533 | 1.5849  | -2.7124 | H          | -1.8576 | -5.1912 | -3.5063 |
| H | -5.3456 | -2.2099 | -1.7460 | H          | -2.3513 | 1.5251  | 1.0076  |
| H | -4.0545 | 2.2835  | -4.2664 | H          | -1.2596 | 0.8784  | -0.3284 |
| H | -4.3529 | -3.9515 | 1.4021  | H          | 0.7906  | -0.4186 | 0.2883  |
| H | -4.0920 | 2.4627  | 6.0343  | H          | 1.1927  | -0.8187 | 1.9768  |
| H | -5.1606 | 6.5683  | 1.7445  | H          | 1.4827  | 0.8310  | 1.3662  |
| H | -4.5784 | 5.4189  | 0.5485  |            |         |         |         |
| H | -3.8830 | -1.2918 | -3.3639 | <b>15:</b> |         |         |         |
| H | -2.3810 | 6.9606  | -0.8566 | -6779.8909 |         |         |         |
| H | -3.0032 | 3.1258  | -2.5034 | Cr         | -3.2005 | -1.4770 | 2.4133  |
| H | -3.0895 | -0.3532 | -5.5654 | Cr         | 1.5685  | -0.9754 | -2.9794 |
| H | -2.2957 | 2.1895  | 3.4916  | Cl         | -5.1940 | -1.5788 | 3.7662  |
| H | -3.7033 | -6.1909 | -1.5543 | Cl         | 1.6011  | 0.1085  | -5.1868 |
| H | -5.8048 | 4.5355  | 4.4844  | O          | -1.6289 | -1.6201 | 1.1691  |
| H | -2.6578 | -5.6707 | 0.6732  | O          | -0.1548 | -0.1379 | -2.6726 |
| H | -2.9818 | 7.8492  | 1.4799  | O          | -1.8778 | 5.1357  | 0.3846  |
| H | -3.3866 | -0.5039 | -1.8429 | O          | -2.0330 | -1.7773 | 3.9263  |
| H | -4.9177 | -5.7394 | -0.3444 | O          | -1.6387 | 5.1653  | -1.9147 |
| H | -2.2209 | 1.2033  | -5.6367 | O          | -3.1901 | 0.4595  | 2.4706  |
| H | -1.4968 | 0.6841  | 4.7924  | O          | -5.2001 | 4.3860  | -1.8726 |
| H | -2.2310 | 3.4734  | 4.7183  | O          | -6.4645 | 4.2656  | 0.0610  |
| H | -3.0315 | -2.2718 | -0.7587 | O          | 0.9062  | -2.6284 | -3.7486 |
| H | -2.7318 | -5.4530 | -6.4607 | O          | 1.5268  | -1.7978 | -1.1220 |
| H | -4.2511 | 4.7597  | 5.3225  | O          | 3.3325  | -1.0170 | 0.6296  |
| H | -2.2040 | -1.3282 | 6.1834  | N          | -3.3373 | -3.4918 | 2.1322  |
| H | -2.0564 | -3.1126 | -6.6047 | N          | -4.3578 | -1.4166 | 0.7502  |
| H | -2.1764 | -1.3512 | -2.8392 | N          | 2.4784  | 0.6943  | -2.2393 |
| H | -2.7981 | 6.1938  | 2.0929  | N          | 3.4741  | -1.4959 | -3.4799 |
| H | -4.4134 | 5.2497  | 3.6221  | C          | 0.2094  | 0.0306  | 1.6959  |
| H | -1.0875 | 6.8354  | 0.3231  | C          | -0.1938 | -1.3676 | 1.2977  |
| H | -2.4476 | 3.8839  | 2.9874  | C          | -0.3848 | -1.6651 | -0.1375 |
| H | -2.0889 | -4.5613 | -0.5841 | C          | 0.0764  | 3.4428  | -1.8419 |
| H | -1.3822 | -0.2560 | -5.0500 | C          | -0.7433 | -5.2250 | 4.0751  |

|   |         |         |         |   |         |         |         |
|---|---------|---------|---------|---|---------|---------|---------|
| C | -0.8156 | -4.7157 | -4.6972 | C | 0.2134  | -3.8943 | 5.8393  |
| C | -0.5431 | -2.7743 | 5.5000  | C | 0.1443  | -5.1110 | 5.1274  |
| C | -0.5469 | -1.4946 | 6.3627  | C | 0.3965  | -1.6193 | 7.5822  |
| C | -1.1345 | -4.6890 | -3.1746 | C | 0.7094  | -4.6852 | -4.9372 |
| C | -0.4876 | 1.1419  | -2.5247 | C | 1.8797  | 1.8128  | -1.9497 |
| C | -1.4713 | -3.4837 | -5.3816 | C | 1.4967  | -3.5824 | -4.4435 |
| C | -1.5330 | -4.1219 | 3.6688  | C | 1.3622  | -5.6853 | -5.6519 |
| C | -1.4700 | -5.9891 | -5.2854 | C | 2.7490  | -5.6605 | -5.9189 |
| C | -1.9886 | -1.2534 | 6.8958  | C | 2.9096  | -3.5562 | -4.7064 |
| C | -1.3903 | -2.8591 | 4.3385  | C | 3.9452  | 0.4960  | -2.0973 |
| C | -0.0925 | -0.2615 | 5.5381  | C | 3.5050  | -4.6036 | -5.4547 |
| C | -1.2378 | 3.7948  | -2.0339 | C | 3.7773  | -2.5004 | -4.2553 |
| C | -2.5248 | -4.3632 | 2.6481  | C | 4.4206  | -0.3543 | -3.3003 |
| C | -1.8430 | 1.5515  | -2.7718 | C | 4.7932  | 1.7735  | -1.9759 |
| C | -1.9509 | 5.7282  | -0.6930 | C | 5.8990  | -0.7441 | -3.1197 |
| C | -2.1899 | 2.8718  | -2.4920 | C | 6.2856  | 1.4128  | -1.8234 |
| C | -2.3376 | 7.1800  | -0.8870 | C | 6.7733  | 0.5196  | -2.9782 |
| C | -3.2389 | 4.6592  | 3.8456  | C | 2.2146  | -2.8954 | -0.4565 |
| C | -1.6041 | 2.8933  | 3.1725  | C | 2.4084  | -4.1594 | -1.2900 |
| C | -2.3502 | 0.3296  | -4.8990 | C | 3.5457  | -2.3544 | 0.0943  |
| C | -2.9486 | -0.7707 | -2.6999 | H | -0.1135 | 0.2279  | 2.7182  |
| C | -4.3388 | -5.2311 | 0.5394  | H | 1.2993  | 0.1268  | 1.6580  |
| C | -3.1239 | 7.7481  | 0.3062  | H | -0.2511 | 0.7713  | 1.0366  |
| C | -2.8426 | 0.5868  | -3.4464 | H | 0.2997  | -2.1359 | 1.8975  |
| C | -4.4100 | -3.8292 | 1.1661  | H | -0.4932 | -2.6878 | -0.4610 |
| C | -5.4880 | -5.4409 | -0.4682 | H | -0.6514 | -0.8828 | -0.8281 |
| C | -4.4000 | -2.7318 | 0.0671  | H | -0.7021 | -5.5633 | -2.6707 |
| C | -3.0903 | 3.1494  | 3.5399  | H | -0.8546 | -6.1696 | 3.5467  |
| C | -3.9988 | 1.3453  | 1.9115  | H | -2.3099 | -2.0934 | 7.5246  |
| C | -3.9926 | 2.7123  | 2.3712  | H | -0.7381 | -3.7807 | -2.7194 |
| C | -4.5603 | 7.1980  | 0.4007  | H | -1.2963 | -3.5081 | -6.4637 |
| C | -4.8791 | 0.9775  | 0.8364  | H | 0.9086  | -0.4208 | 5.1177  |
| C | -4.2639 | 1.1979  | -3.5120 | H | -1.0614 | -2.5559 | -4.9845 |
| C | -5.5569 | -2.9397 | -0.9249 | H | -1.3416 | -6.0501 | -6.3731 |
| C | -4.9594 | -0.3564 | 0.2991  | H | -1.0650 | -6.9042 | -4.8357 |
| C | -5.4898 | -4.3465 | -1.5499 | H | -2.0117 | -0.3399 | 7.5046  |
| C | -3.4702 | 2.3505  | 4.8174  | H | -0.0568 | 0.6260  | 6.1834  |
| C | -4.8175 | 3.6242  | 1.7249  | H | -2.2228 | -4.7151 | -3.0247 |
| C | -5.6890 | 1.9540  | 0.2083  | H | -2.5942 | -5.4053 | 2.3280  |
| C | -5.6407 | 3.2508  | 0.6536  | H | -1.3278 | -0.0568 | -4.9076 |
| C | -5.5295 | 7.7973  | -0.6380 | H | -3.3732 | -5.3522 | 0.0262  |
| C | -6.1386 | 4.7851  | -1.1799 | H | -1.3418 | 3.4306  | 2.2552  |
| C | -6.9369 | 7.1546  | -0.6296 | H | -1.4046 | 7.7427  | -1.0386 |
| C | -7.0788 | 5.9082  | -1.5403 | H | -2.9387 | 5.2681  | 2.9849  |
| C | 0.4773  | 2.1087  | -2.0937 | H | -2.5808 | 7.4982  | 1.2248  |



|   |         |         |         |            |         |         |         |
|---|---------|---------|---------|------------|---------|---------|---------|
| H | -2.0236 | -1.3381 | -2.7916 | H          | 0.3388  | -0.6972 | 8.1719  |
| H | -2.5560 | -3.4927 | -5.2085 | H          | 0.7904  | -6.5239 | -6.0316 |
| H | -2.6983 | -1.1424 | 6.0739  | H          | 1.4420  | -1.7558 | 7.2781  |
| H | -2.5827 | 4.9146  | 4.6860  | H          | 0.1137  | -2.4525 | 8.2379  |
| H | -2.5463 | -5.9643 | -5.0804 | H          | 2.4805  | 2.6495  | -1.5892 |
| H | -3.4460 | -2.8184 | -0.4742 | H          | 3.2049  | -6.4639 | -6.4879 |
| H | -0.9540 | 3.2442  | 3.9848  | H          | 4.0892  | -0.0887 | -1.1801 |
| H | -0.7940 | -0.0741 | 4.7263  | H          | 4.3074  | 0.2629  | -4.2028 |
| H | -2.3706 | 1.2609  | -5.4782 | H          | 4.4774  | 2.3561  | -1.1028 |
| H | -6.4478 | -5.4217 | 0.0690  | H          | 4.6421  | 2.4025  | -2.8655 |
| H | -3.1551 | -0.6128 | -1.6379 | H          | 4.5740  | -4.5615 | -5.6530 |
| H | -3.1494 | 8.8448  | 0.2329  | H          | 4.7987  | -2.5720 | -4.6371 |
| H | -4.3903 | -5.9979 | 1.3222  | H          | 5.9988  | -1.3758 | -2.2251 |
| H | -4.2646 | 4.9222  | 4.1345  | H          | 6.4295  | 0.8848  | -0.8699 |
| H | -5.4009 | -6.4332 | -0.9289 | H          | 6.2541  | -1.3327 | -3.9733 |
| H | -1.4381 | 1.8293  | 3.0217  | H          | 6.7344  | 1.0869  | -3.9196 |
| H | -3.0096 | -0.3972 | -5.3942 | H          | 6.8853  | 2.3305  | -1.7731 |
| H | -3.2018 | 3.2311  | -2.6264 | H          | 7.8214  | 0.2333  | -2.8222 |
| H | -2.8948 | 7.2575  | -1.8260 | H          | 1.5884  | -3.1626 | 0.4075  |
| H | -3.7676 | -1.3594 | -3.1364 | H          | 1.4529  | -4.5111 | -1.6837 |
| H | -4.5144 | 6.1091  | 0.3057  | H          | 2.8359  | -4.9528 | -0.6608 |
| H | -4.9610 | 7.3981  | 1.4042  | H          | 3.0800  | -3.9919 | -2.1331 |
| H | -2.8010 | 2.6298  | 5.6420  | H          | 4.2924  | -2.3203 | -0.7130 |
| H | -5.3496 | -3.7199 | 1.7271  | H          | 3.9290  | -2.9852 | 0.9018  |
| H | -4.2908 | 2.1138  | -4.1116 | H          | 2.5420  | -0.6932 | 0.1259  |
| H | -5.5139 | -2.1896 | -1.7223 |            |         |         |         |
| H | -4.6515 | 1.4358  | -2.5157 | <b>16:</b> |         |         |         |
| H | -4.5756 | -4.4308 | -2.1560 | -6779.8909 |         |         |         |
| H | -5.5940 | -0.4484 | -0.5833 | Cr         | 1.2073  | -0.8101 | -3.0945 |
| H | -4.8385 | 4.6581  | 2.0359  | Cr         | -2.8068 | -1.3983 | 2.5949  |
| H | -4.9401 | 0.4740  | -3.9833 | Cl         | 1.6822  | 0.6757  | -4.8055 |
| H | -4.5008 | 2.5749  | 5.1202  | Cl         | -4.8540 | -0.8822 | 3.7639  |
| H | -6.3361 | -4.4895 | -2.2339 | O          | 3.4208  | -2.8480 | -0.2393 |
| H | -3.3866 | 1.2758  | 4.6470  | O          | 0.7859  | -2.1183 | -1.2795 |
| H | -5.6247 | 8.8746  | -0.4370 | O          | 0.8863  | -2.3077 | -4.2474 |
| H | -5.1029 | 7.7124  | -1.6480 | O          | -6.1354 | 4.0874  | 0.1729  |
| H | -6.5140 | -2.8079 | -0.3985 | O          | -5.8376 | 3.8073  | -2.0876 |
| H | -6.3344 | 1.6741  | -0.6171 | O          | -2.4423 | 0.4594  | 2.1471  |
| H | -7.2129 | 6.8779  | 0.3957  | O          | -2.6607 | 4.7685  | -1.7458 |
| H | -6.8797 | 6.1749  | -2.5825 | O          | -1.8119 | -1.4718 | 4.2599  |
| H | -7.6783 | 7.8887  | -0.9720 | O          | -1.2988 | 5.6503  | -0.1140 |
| H | -8.1055 | 5.5300  | -1.4677 | O          | -0.6009 | -0.2030 | -3.0198 |
| H | 0.8052  | 4.1814  | -1.5239 | O          | -1.2985 | -2.0767 | 1.6258  |
| H | 0.8769  | -3.8454 | 6.6954  | N          | 3.1994  | -1.2244 | -3.0695 |
| H | 0.7592  | -5.9521 | 5.4291  | N          | 1.7293  | 0.5221  | -1.6748 |

|   |         |         |         |   |         |         |         |
|---|---------|---------|---------|---|---------|---------|---------|
| N | -3.9282 | -1.5187 | 0.8975  | C | -4.3904 | -5.2610 | 1.4342  |
| N | -3.2595 | -3.3733 | 2.7308  | C | -3.3439 | -1.0684 | -3.0325 |
| C | 2.6446  | -3.7164 | -1.0546 | C | -2.7694 | 0.1843  | -5.1502 |
| C | 0.4250  | -4.4861 | -1.9012 | C | -0.7083 | 2.8614  | 2.3207  |
| C | 1.1410  | -3.4921 | -0.9869 | C | -2.1781 | 4.7042  | 3.1417  |
| C | 6.0071  | 0.5183  | -1.0209 | C | -2.8190 | 7.0926  | -1.3264 |
| C | 5.1187  | 0.9021  | 0.1751  | C | -2.8920 | 2.5651  | -2.5432 |
| C | 5.3606  | -0.6089 | -1.8508 | C | -2.1605 | 5.7676  | -0.9697 |
| C | 3.7184  | 1.3412  | -0.2941 | C | -2.4302 | 1.3088  | -2.9211 |
| C | 3.9637  | -0.1851 | -2.3313 | C | -2.5497 | -4.2081 | 3.4149  |
| C | 3.7874  | -2.0964 | -3.8241 | C | -2.0806 | 3.4795  | -1.8476 |
| C | 3.9720  | -3.9933 | -5.3414 | C | 0.6230  | 0.0303  | 5.0006  |
| C | 3.0736  | 0.2338  | -1.1335 | C | -1.1759 | -2.5098 | 4.7328  |
| C | 3.1354  | -3.0613 | -4.6785 | C | -1.0741 | -0.2449 | 6.8561  |
| C | 3.4419  | -4.9428 | -6.1939 | C | -0.6982 | -5.0949 | -7.2196 |
| C | 2.0508  | -4.9503 | -6.4333 | C | -1.4934 | -3.8626 | 4.3431  |
| C | 1.7141  | -3.0985 | -4.8922 | C | -0.6656 | -2.6278 | -6.7995 |
| C | 1.0233  | 1.5497  | -1.3230 | C | -1.0748 | 0.9625  | -2.6067 |
| C | 1.1739  | -4.0513 | -5.8282 | C | -1.2183 | -4.2437 | -4.9355 |
| C | 1.3236  | -0.8416 | 7.2275  | C | 0.1818  | -0.8667 | 6.1878  |
| C | 0.2454  | -4.7285 | 5.8199  | C | -0.1340 | -2.2984 | 5.7128  |
| C | 0.5449  | -3.4062 | 6.2146  | C | -0.3250 | -4.0123 | -6.1829 |
| C | -0.2993 | 1.8605  | -1.8049 | C | -0.7704 | -4.9418 | 4.9052  |
| C | -7.4253 | 5.4466  | -1.2764 | C | -0.8108 | 3.1294  | -1.4388 |
| C | -7.2587 | 6.6745  | -0.3549 | C | -0.4908 | -1.7927 | -0.5912 |
| C | -6.3623 | 4.3681  | -1.1445 | C | -0.3968 | -1.2945 | 0.8792  |
| C | -5.9606 | 7.4780  | -0.6081 | C | 0.9909  | -1.3612 | 1.5360  |
| C | -5.1517 | 3.1251  | 0.5431  | H | -0.7026 | -0.2376 | 0.8837  |
| C | -5.2440 | 1.8014  | 0.1723  | H | 2.9267  | -2.6859 | 0.5791  |
| C | -4.1456 | 3.5679  | 1.4166  | H | 2.8135  | -4.7683 | -0.7692 |
| C | -2.2622 | 2.4824  | 4.2941  | H | 2.9949  | -3.5918 | -2.0779 |
| C | -5.2817 | -4.6911 | -0.8734 | H | 0.8385  | -4.4645 | -2.9109 |
| C | -4.5195 | -0.5173 | 0.3343  | H | 0.5296  | -5.4999 | -1.4937 |
| C | -5.2193 | -3.1896 | -0.5388 | H | -0.6407 | -4.2506 | -1.9674 |
| C | -4.7768 | 0.8337  | -3.7814 | H | 0.8188  | -3.6661 | 0.0465  |
| C | -4.3361 | 0.8663  | 0.7165  | H | 6.9975  | 0.1989  | -0.6723 |
| C | -4.7827 | 7.0406  | 0.2845  | H | 5.5850  | 1.7062  | 0.7583  |
| C | -3.2048 | 2.6946  | 1.9503  | H | 6.1547  | 1.4023  | -1.6602 |
| C | -3.3063 | 1.2969  | 1.6242  | H | 6.0053  | -0.8428 | -2.7075 |
| C | -2.1089 | 3.1772  | 2.9140  | H | 5.0150  | 0.0314  | 0.8388  |
| C | -4.1052 | -2.9181 | 0.4810  | H | 5.2554  | -1.5156 | -1.2414 |
| C | -5.5042 | -5.5260 | 0.4023  | H | 4.8782  | -2.1424 | -3.8350 |
| C | -4.3149 | -3.7670 | 1.7805  | H | 5.0441  | -3.9464 | -5.1623 |
| C | -3.3185 | 0.3301  | -3.7071 | H | 3.7923  | 2.2607  | -0.8937 |
| C | -3.4619 | 7.7415  | -0.0826 | H | 3.0887  | 1.5633  | 0.5767  |

|   |         |         |         |            |         |         |         |
|---|---------|---------|---------|------------|---------|---------|---------|
| H | 4.0410  | 0.6746  | -3.0130 | H          | -0.1562 | 0.0760  | 4.2381  |
| H | 2.9730  | -0.6710 | -0.5277 | H          | 0.0645  | 3.1943  | 3.0282  |
| H | 4.0828  | -5.6632 | -6.6916 | H          | -3.1369 | -3.2292 | 0.0633  |
| H | 1.4313  | 2.2602  | -0.6025 | H          | -1.7673 | -5.0091 | -7.4467 |
| H | 1.0572  | -1.4138 | 8.1256  | H          | -1.3710 | 4.9943  | 3.8258  |
| H | 2.2526  | -1.2535 | 6.8114  | H          | -1.9104 | -0.2251 | 6.1545  |
| H | 1.6591  | -5.6820 | -7.1291 | H          | -1.7392 | -2.5841 | -7.0289 |
| H | 1.5086  | 0.1981  | 7.5241  | H          | -2.3752 | -1.5615 | -3.1179 |
| H | 0.8011  | -5.5611 | 6.2402  | H          | -2.7466 | 7.6739  | 0.7463  |
| H | 1.3349  | -3.2590 | 6.9429  | H          | -2.0475 | 5.2542  | 2.2023  |
| H | -0.2017 | 3.8052  | -0.8575 | H          | -2.0281 | 7.7424  | -1.7234 |
| H | -8.3938 | 4.9706  | -1.0627 | H          | -0.5779 | 3.3999  | 1.3747  |
| H | -8.1311 | 7.3216  | -0.5174 | H          | -3.4208 | -5.5766 | 1.0206  |
| H | -7.4312 | 5.7560  | -2.3268 | H          | -1.7310 | -0.1558 | -5.1343 |
| H | -7.2883 | 6.3430  | 0.6904  | H          | -2.7298 | -5.2824 | 3.3111  |
| H | -6.0222 | 1.4692  | -0.5061 | H          | -2.2732 | -4.2172 | -5.2413 |
| H | -6.1802 | -2.8644 | -0.1133 | H          | 0.8194  | 1.0482  | 5.3661  |
| H | -5.6787 | 7.3881  | -1.6682 | H          | -0.8482 | 0.7824  | 7.1766  |
| H | -6.1467 | 8.5468  | -0.4256 | H          | -0.5091 | -6.1036 | -6.8288 |
| H | -2.1994 | 1.3979  | 4.2012  | H          | -0.1370 | -4.9692 | -8.1542 |
| H | -6.0815 | -4.8823 | -1.6005 | H          | -0.4230 | -1.8202 | -6.1058 |
| H | -3.2319 | 2.7386  | 4.7387  | H          | 1.5476  | -0.3615 | 4.5553  |
| H | -5.3820 | 0.0904  | -4.3145 | H          | -0.1031 | -2.4776 | -7.7301 |
| H | -4.1326 | 4.6132  | 1.6888  | H          | -1.0444 | -3.4678 | -4.1900 |
| H | -5.2266 | -0.6848 | -0.4814 | H          | -1.3573 | -0.8330 | 7.7393  |
| H | -4.3338 | -4.9945 | -1.3424 | H          | -1.0303 | -5.9539 | 4.5984  |
| H | -5.1948 | 0.9811  | -2.7780 | H          | -1.0088 | -5.2249 | -4.4897 |
| H | -5.0428 | -2.6090 | -1.4507 | H          | -0.9691 | -1.0609 | -1.2270 |
| H | -4.8510 | 1.7852  | -4.3202 | H          | -1.0977 | -2.7010 | -0.5810 |
| H | -5.2646 | -3.4355 | 2.2231  | H          | 1.2819  | -2.4088 | 1.6980  |
| H | -1.4634 | 2.8323  | 4.9633  | H          | 0.9123  | -0.9005 | 2.5227  |
| H | -5.0451 | 7.2423  | 1.3327  | H          | 1.7524  | -0.8346 | 0.9526  |
| H | -4.6412 | 5.9602  | 0.2020  |            |         |         |         |
| H | -4.1073 | -1.6909 | -3.5201 | <b>17:</b> |         |         |         |
| H | -3.5631 | 6.9393  | -2.1128 | -6626.061  |         |         |         |
| H | -3.8989 | 2.8842  | -2.7667 | Cr         | -1.6510 | -1.5219 | 1.2819  |
| H | -3.3768 | -0.5460 | -5.7042 | Cr         | 0.4381  | -1.1408 | -1.9256 |
| H | -0.5982 | 1.7876  | 2.1517  | Cl         | -3.4196 | -1.2121 | 2.8966  |
| H | -5.5434 | -6.5961 | 0.1594  | Cl         | 1.3330  | 0.1098  | -3.8131 |
| H | -3.1329 | 4.9917  | 3.6024  | O          | -1.2581 | -0.2779 | -2.2860 |
| H | -4.5684 | -5.8485 | 2.3439  | O          | -1.6387 | 5.8027  | -0.1122 |
| H | -3.6460 | 8.8080  | -0.2755 | O          | -0.3676 | -1.7602 | 2.7388  |
| H | -3.5912 | -0.9727 | -1.9714 | O          | -2.6704 | 5.0815  | -2.0415 |
| H | -6.4740 | -5.2513 | 0.8431  | O          | -1.5204 | 0.4115  | 1.1405  |
| H | -2.8189 | 1.1479  | -5.6735 | O          | -5.7860 | 3.7743  | -2.1134 |

|   |         |         |         |   |         |         |         |
|---|---------|---------|---------|---|---------|---------|---------|
| O | -5.7443 | 3.9048  | 0.1814  | C | -4.8558 | -4.5362 | -1.8618 |
| O | 0.1191  | -2.6685 | -3.0914 | C | -1.8903 | 1.9631  | 3.8712  |
| O | -0.1790 | -2.1010 | -0.1410 | C | -3.6593 | 3.3649  | 1.2302  |
| O | 2.5404  | -4.4111 | 1.0665  | C | -4.6708 | 1.7368  | -0.2374 |
| N | -2.2821 | -3.4750 | 1.4752  | C | -4.6692 | 2.9871  | 0.3376  |
| N | -3.0807 | -1.5246 | -0.1459 | C | -6.1036 | 7.2889  | -0.3850 |
| N | 1.0359  | 0.3916  | -0.7719 | C | -6.2173 | 4.2141  | -1.0657 |
| N | 2.4217  | -1.6492 | -1.7690 | C | -7.2533 | 6.3312  | 0.0181  |
| C | -1.0804 | 3.2854  | -1.3636 | C | -7.4190 | 5.1394  | -0.9494 |
| C | -0.7254 | -5.0445 | 4.3771  | C | -0.7062 | 1.9293  | -1.4933 |
| C | -1.0030 | -4.2850 | -5.1703 | C | 0.9644  | -3.7389 | 5.4772  |
| C | 0.7623  | -2.6446 | 4.6387  | C | 0.2440  | -4.9454 | 5.3551  |
| C | 1.4988  | -1.3136 | 4.8830  | C | 2.5299  | -1.4195 | 6.0287  |
| C | -1.8695 | -4.7060 | -3.9570 | C | 0.4889  | -4.2804 | -4.8013 |
| C | -1.4698 | 1.0262  | -2.3033 | C | 0.4728  | 1.5522  | -0.7601 |
| C | -1.4407 | -2.8706 | -5.6254 | C | 0.9742  | -3.3963 | -3.7696 |
| C | -0.9744 | -3.9795 | 3.4780  | C | 1.3995  | -5.1018 | -5.4625 |
| C | -1.3176 | -5.2687 | -6.3190 | C | 2.7802  | -5.1050 | -5.1747 |
| C | 0.4532  | -0.2415 | 5.2776  | C | 2.3885  | -3.3823 | -3.4959 |
| C | -0.2166 | -2.7563 | 3.5774  | C | 2.2894  | 0.1064  | -0.0523 |
| C | 2.2642  | -0.8229 | 3.6278  | C | 3.2591  | -4.2445 | -4.2071 |
| C | -2.1694 | 3.7525  | -2.0663 | C | 3.0140  | -2.4938 | -2.5515 |
| C | -1.9967 | -4.2243 | 2.4889  | C | 3.2210  | -0.6036 | -1.0701 |
| C | -2.5060 | 1.5817  | -3.1395 | C | 3.0029  | 1.3115  | 0.5768  |
| C | -2.3649 | 5.9855  | -1.0768 | C | 4.5184  | -1.0733 | -0.3877 |
| C | -2.8456 | 2.9190  | -2.9706 | C | 4.3255  | 0.8692  | 1.2344  |
| C | -3.0522 | 7.3129  | -1.3710 | C | 5.2394  | 0.1413  | 0.2308  |
| C | -1.8216 | 4.3640  | 3.1442  | C | 0.4198  | -3.3706 | 0.2734  |
| C | -0.1366 | 2.7724  | 2.2482  | C | 0.3500  | -4.4815 | -0.7766 |
| C | -1.9809 | 0.4824  | -5.3072 | C | 1.8424  | -3.1721 | 0.8120  |
| C | -3.7496 | -0.5617 | -3.8276 | C | 1.9846  | -5.1448 | 2.1664  |
| C | -3.5403 | -5.2707 | 0.1742  | H | -1.5836 | -5.7047 | -3.6001 |
| C | -3.6347 | 7.9165  | -0.0782 | H | -1.3125 | -5.9547 | 4.2741  |
| C | -3.1194 | 0.7693  | -4.2942 | H | -0.0279 | -0.5112 | 6.2263  |
| C | -3.4338 | -3.7991 | 0.6078  | H | -1.7558 | -3.9890 | -3.1421 |
| C | -4.8335 | -5.4696 | -0.6382 | H | -0.8641 | -2.5553 | -6.5040 |
| C | -3.3676 | -2.8828 | -0.6421 | H | 2.9935  | -1.5739 | 3.2969  |
| C | -1.6194 | 2.9056  | 2.6725  | H | -1.2846 | -2.1462 | -4.8278 |
| C | -2.5489 | 1.2181  | 0.9295  | H | -0.7623 | -5.0083 | -7.2289 |
| C | -2.6022 | 2.5158  | 1.5534  | H | -1.0751 | -6.3034 | -6.0419 |
| C | -4.8246 | 7.0964  | 0.4528  | H | 0.9453  | 0.7341  | 5.3963  |
| C | -3.6292 | 0.8353  | 0.0662  | H | 2.8062  | 0.0987  | 3.8798  |
| C | -4.2260 | 1.5530  | -5.0362 | H | -2.9208 | -4.7324 | -4.2738 |
| C | -4.6517 | -3.0585 | -1.4687 | H | -2.5495 | -5.1559 | 2.6358  |
| C | -3.7818 | -0.4934 | -0.4750 | H | -1.1420 | -0.0243 | -4.8277 |

|   |         |         |         |            |         |         |         |
|---|---------|---------|---------|------------|---------|---------|---------|
| H | -2.6624 | -5.5251 | -0.4360 | H          | -8.2079 | 6.8737  | 0.0365  |
| H | 0.0882  | 3.4771  | 1.4384  | H          | -8.2691 | 4.5228  | -0.6211 |
| H | -2.2964 | 7.9915  | -1.7915 | H          | -0.5251 | 3.9311  | -0.7020 |
| H | -1.7019 | 5.0678  | 2.3117  | H          | 1.7030  | -3.6717 | 6.2664  |
| H | -2.8361 | 7.9415  | 0.6728  | H          | 0.4416  | -5.7693 | 6.0329  |
| H | -3.0434 | -1.1263 | -3.2192 | H          | 3.0186  | -0.4453 | 6.1502  |
| H | -2.5073 | -2.8833 | -5.8908 | H          | 1.0423  | -5.7661 | -6.2396 |
| H | -0.3100 | -0.1584 | 4.5058  | H          | 3.3000  | -2.1696 | 5.8056  |
| H | -1.0695 | 4.5890  | 3.9108  | H          | 2.0476  | -1.6801 | 6.9790  |
| H | -2.3901 | -5.2144 | -6.5430 | H          | 0.9168  | 2.3528  | -0.1750 |
| H | -2.4916 | -3.1749 | -1.2370 | H          | 3.4494  | -5.7657 | -5.7165 |
| H | 0.5005  | 3.0208  | 3.1092  | H          | 2.0395  | -0.6056 | 0.7403  |
| H | 1.5712  | -0.6151 | 2.8121  | H          | 3.4700  | 0.1395  | -1.8409 |
| H | -1.6093 | 1.4280  | -5.7218 | H          | 2.3494  | 1.7771  | 1.3236  |
| H | -5.6959 | -5.2489 | 0.0093  | H          | 3.2033  | 2.0561  | -0.2070 |
| H | -4.6591 | -0.3604 | -3.2469 | H          | 4.3215  | -4.2117 | -3.9740 |
| H | -3.9518 | 8.9524  | -0.2660 | H          | 4.1060  | -2.5406 | -2.5462 |
| H | -3.5457 | -5.9364 | 1.0451  | H          | 4.2878  | -1.8090 | 0.3928  |
| H | -2.8125 | 4.5052  | 3.5949  | H          | 4.0950  | 0.1883  | 2.0631  |
| H | -4.9223 | -6.5160 | -0.9580 | H          | 5.1807  | -1.5623 | -1.1117 |
| H | 0.0776  | 1.7542  | 1.9230  | H          | 5.5250  | 0.8352  | -0.5743 |
| H | -2.3605 | -0.1394 | -6.1301 | H          | 4.8390  | 1.7422  | 1.6586  |
| H | -3.6566 | 3.3598  | -3.5308 | H          | 6.1628  | -0.1860 | 0.7261  |
| H | -3.8250 | 7.1662  | -2.1311 | H          | -0.1628 | -3.7235 | 1.1122  |
| H | -4.0320 | -1.1583 | -4.7056 | H          | -0.6175 | -4.4606 | -1.2848 |
| H | -4.5532 | 6.0349  | 0.4750  | H          | 0.4703  | -5.4483 | -0.2711 |
| H | -5.0413 | 7.3829  | 1.4919  | H          | 1.1395  | -4.4023 | -1.5225 |
| H | -1.1747 | 2.1721  | 4.6778  | H          | 2.4422  | -2.6748 | 0.0638  |
| H | -4.3355 | -3.5120 | 1.1691  | H          | 1.7979  | -2.5676 | 1.7242  |
| H | -3.8251 | 2.4585  | -5.5084 | H          | 0.9802  | -5.5280 | 1.9378  |
| H | -4.6081 | -2.4439 | -2.3707 | H          | 1.9176  | -4.5266 | 3.0713  |
| H | -5.0377 | 1.8443  | -4.3569 | H          | 2.6563  | -5.9919 | 2.3466  |
| H | -4.0518 | -4.8338 | -2.5431 |            |         |         |         |
| H | -4.6008 | -0.6104 | -1.1804 |            |         |         |         |
| H | -3.7293 | 4.3470  | 1.6761  |            |         |         |         |
| H | -4.6378 | 0.9114  | -5.8253 |            |         |         |         |
| H | -2.9087 | 2.1185  | 4.2482  |            |         |         |         |
| H | -5.8026 | -4.6439 | -2.4072 |            |         |         |         |
| H | -1.8015 | 0.9195  | 3.5675  |            |         |         |         |
| H | -6.4290 | 8.3340  | -0.2796 |            |         |         |         |
| H | -5.8730 | 7.1435  | -1.4504 |            |         |         |         |
| H | -5.5054 | -2.7127 | -0.8665 |            |         |         |         |
| H | -5.4601 | 1.4388  | -0.9166 |            |         |         |         |
| H | -7.0780 | 5.9479  | 1.0308  |            |         |         |         |
| H | -7.6377 | 5.4981  | -1.9604 |            |         |         |         |
|   |         |         |         | <b>18:</b> |         |         |         |
|   |         |         |         | -6626.0764 |         |         |         |
|   |         |         |         | Cr         | 1.2196  | -1.0040 | -2.7171 |
|   |         |         |         | Cr         | -2.9269 | -1.5469 | 2.1026  |
|   |         |         |         | Cl         | 2.2060  | -0.3742 | -4.8652 |
|   |         |         |         | Cl         | -4.7494 | -2.0451 | 3.3485  |
|   |         |         |         | O          | 1.4199  | -0.9746 | 1.9355  |
|   |         |         |         | O          | 0.3625  | -1.2746 | -1.0280 |
|   |         |         |         | O          | 0.6221  | -2.7056 | -3.4549 |
|   |         |         |         | O          | -6.4611 | 4.1181  | 0.2699  |
|   |         |         |         | O          | -5.2466 | 4.6061  | -1.6179 |
|   |         |         |         | O          | -2.8752 | 0.3438  | 2.1737  |

|   |         |         |         |   |         |         |         |
|---|---------|---------|---------|---|---------|---------|---------|
| O | -2.0872 | 5.1047  | -1.9977 | C | -3.7224 | 1.2384  | 1.6947  |
| O | -1.4949 | -1.7210 | 3.3196  | C | -2.6472 | 2.9931  | 3.2507  |
| O | -2.1628 | 5.0120  | 0.2931  | C | -3.9221 | -2.6572 | -0.4583 |
| O | -0.3608 | 0.0006  | -3.2300 | C | -4.6508 | -5.4335 | -1.1731 |
| N | 3.0579  | -1.8141 | -2.3253 | C | -3.6654 | -3.8464 | 0.5014  |
| N | 2.0654  | 0.6530  | -1.8830 | C | -3.0517 | 0.6095  | -3.8641 |
| N | -3.9635 | -1.4233 | 0.3673  | C | -3.2601 | 7.6386  | 0.4451  |
| N | -2.6115 | -3.4290 | 1.4542  | C | -3.4150 | -5.1281 | -0.3021 |
| C | 1.0806  | 0.3228  | 1.4105  | C | -3.1127 | -0.7543 | -3.1307 |
| C | 1.6230  | -2.0088 | 0.9517  | C | -2.5359 | 0.3761  | -5.3078 |
| C | 0.4868  | -3.6829 | -0.5427 | C | -1.2334 | 2.7944  | 2.6456  |
| C | 0.4361  | -2.2411 | -0.0073 | C | -2.7877 | 4.4801  | 3.6408  |
| C | 6.3210  | 0.0173  | -1.2404 | C | -2.7316 | 7.0707  | -0.8799 |
| C | 5.6538  | 1.1860  | -0.4941 | C | -2.5233 | 2.8634  | -2.7789 |
| C | 5.3608  | -1.1831 | -1.3633 | C | -2.3127 | 5.6121  | -0.7547 |
| C | 4.3341  | 1.5996  | -1.1750 | C | -2.1150 | 1.5818  | -3.1284 |
| C | 4.0668  | -0.7508 | -2.0747 | C | -1.6570 | -4.2223 | 1.8382  |
| C | 3.4338  | -3.0099 | -2.6590 | C | -1.6473 | 3.7592  | -2.1424 |
| C | 3.2279  | -5.2993 | -3.4643 | C | 0.4231  | 0.0209  | 4.7514  |
| C | 3.3890  | 0.3898  | -1.2813 | C | -0.6457 | -2.6965 | 3.5732  |
| C | 2.6160  | -4.0388 | -3.2500 | C | -1.1393 | -1.2741 | 6.2650  |
| C | 2.5547  | -6.3199 | -4.1075 | C | -1.3395 | -5.8011 | -5.8024 |
| C | 1.2472  | -6.0804 | -4.5901 | C | -0.6613 | -3.9214 | 2.8299  |
| C | 1.2643  | -3.8120 | -3.6934 | C | -0.7645 | -3.3728 | -5.9550 |
| C | 1.4381  | 1.7686  | -1.6901 | C | -0.7602 | 1.1707  | -2.8261 |
| C | 0.5922  | -4.8650 | -4.4197 | C | -1.8219 | -4.3091 | -3.8643 |
| C | 1.3272  | -1.3295 | 6.6434  | C | 0.2385  | -1.2944 | 5.5481  |
| C | 1.2998  | -4.7047 | 4.0311  | C | 0.3155  | -2.5250 | 4.6271  |
| C | 1.2678  | -3.5243 | 4.8081  | C | -0.8055 | -4.5958 | -4.9991 |
| C | 0.0923  | 2.0836  | -2.1056 | C | 0.3286  | -4.9075 | 3.0720  |
| C | -7.2395 | 5.8933  | -1.0771 | C | -0.3716 | 3.3842  | -1.7919 |
| C | -7.1215 | 7.0299  | -0.0281 | H | 1.9492  | 0.8097  | 0.9446  |
| C | -6.1943 | 4.8139  | -0.8884 | H | 0.2799  | 0.2696  | 0.6687  |
| C | -5.7632 | 7.7625  | -0.0742 | H | 0.7747  | 0.9148  | 2.2722  |
| C | -5.5186 | 3.1413  | 0.6850  | H | 1.7977  | -2.9069 | 1.5560  |
| C | -5.5304 | 1.8799  | 0.1401  | H | 2.5147  | -1.8104 | 0.3371  |
| C | -4.6136 | 3.4894  | 1.6992  | H | 1.4346  | -3.8650 | -1.0550 |
| C | -2.7794 | 2.1431  | 4.5415  | H | 0.3977  | -4.4109 | 0.2721  |
| C | -4.9963 | -4.2493 | -2.0951 | H | -0.3173 | -3.8362 | -1.2682 |
| C | -4.6443 | -0.3803 | -0.0029 | H | -0.4751 | -2.1350 | 0.6132  |
| C | -5.1692 | -2.9321 | -1.3137 | H | 7.2410  | -0.2893 | -0.7251 |
| C | -4.4925 | 1.1613  | -3.9405 | H | 6.3358  | 2.0447  | -0.4403 |
| C | -4.6380 | 0.9044  | 0.6440  | H | 6.6048  | 0.3489  | -2.2503 |
| C | -4.6622 | 7.0902  | 0.7699  | H | 5.8634  | -1.9864 | -1.9138 |
| C | -3.6943 | 2.5784  | 2.2076  | H | 5.4391  | 0.8752  | 0.5392  |

|   |         |         |         |            |         |         |         |
|---|---------|---------|---------|------------|---------|---------|---------|
| H | 5.1112  | -1.5685 | -0.3634 | H          | -3.2273 | -5.9735 | 0.3712  |
| H | 4.4819  | -3.2944 | -2.5343 | H          | -3.2943 | 8.7360  | 0.3905  |
| H | 4.2480  | -5.4445 | -3.1127 | H          | -3.4106 | -0.5950 | -2.0928 |
| H | 4.5289  | 1.9840  | -2.1857 | H          | -5.5058 | -5.6432 | -0.5131 |
| H | 3.8694  | 2.4052  | -0.5953 | H          | -2.5373 | 1.3203  | -5.8678 |
| H | 4.3044  | -0.3541 | -3.0720 | H          | -0.3728 | 0.1457  | 4.0176  |
| H | 3.2054  | 0.0061  | -0.2705 | H          | -0.4779 | 3.0675  | 3.3952  |
| H | 3.0233  | -7.2862 | -4.2650 | H          | -3.0459 | -2.5600 | -1.1169 |
| H | 1.9366  | 2.5752  | -1.1468 | H          | -2.3311 | -5.5504 | -6.1993 |
| H | 1.2362  | -2.2254 | 7.2713  | H          | -2.0054 | 4.7244  | 4.3699  |
| H | 2.3333  | -1.3028 | 6.2060  | H          | -1.9568 | -1.2275 | 5.5424  |
| H | 0.7497  | -6.8811 | -5.1258 | H          | -1.7707 | -3.1990 | -6.3619 |
| H | 1.2053  | -0.4469 | 7.2821  | H          | -2.1363 | -1.2384 | -3.1388 |
| H | 2.0704  | -5.4472 | 4.2080  | H          | -2.5621 | 7.3649  | 1.2447  |
| H | 2.0160  | -3.4045 | 5.5821  | H          | -2.6637 | 5.1238  | 2.7627  |
| H | 0.2869  | 4.0822  | -1.2839 | H          | -1.8569 | 7.6349  | -1.2328 |
| H | -8.2342 | 5.4368  | -1.0025 | H          | -1.1101 | 3.4210  | 1.7568  |
| H | -7.9365 | 7.7395  | -0.2237 | H          | -2.5276 | -4.9927 | -0.9356 |
| H | -7.1107 | 6.3044  | -2.0832 | H          | -1.5208 | -0.0269 | -5.2831 |
| H | -7.2858 | 6.6108  | 0.9733  | H          | -1.5695 | -5.2097 | 1.3834  |
| H | -6.2090 | 1.6311  | -0.6690 | H          | -2.7986 | -4.0918 | -4.3174 |
| H | -6.0469 | -2.9796 | -0.6533 | H          | 0.4004  | 0.8692  | 5.4496  |
| H | -5.4358 | 7.8317  | -1.1222 | H          | -1.1936 | -0.3919 | 6.9172  |
| H | -5.8864 | 8.7951  | 0.2833  | H          | -1.4354 | -6.6957 | -5.1725 |
| H | -2.6049 | 1.0855  | 4.3370  | H          | -0.6797 | -6.0388 | -6.6469 |
| H | -5.9105 | -4.4659 | -2.6629 | H          | -0.4318 | -2.4775 | -5.4275 |
| H | -3.7789 | 2.2641  | 4.9804  | H          | 1.3812  | 0.0070  | 4.2233  |
| H | -5.1341 | 0.4171  | -4.4296 | H          | -0.0777 | -3.5656 | -6.7887 |
| H | -4.6364 | 4.5029  | 2.0698  | H          | -1.5054 | -3.4462 | -3.2749 |
| H | -5.2649 | -0.4382 | -0.8958 | H          | -1.2594 | -2.1729 | 6.8845  |
| H | -4.1865 | -4.1153 | -2.8183 | H          | 0.3108  | -5.8190 | 2.4795  |
| H | -4.8875 | 1.3686  | -2.9364 | H          | -1.9255 | -5.1848 | -3.2080 |
| H | -5.3220 | -2.1202 | -2.0308 |            |         |         |         |
| H | -4.5377 | 2.0884  | -4.5254 |            |         |         |         |
| H | -4.5718 | -3.9699 | 1.1131  |            |         |         |         |
| H | -2.0324 | 2.4877  | 5.2699  |            |         |         |         |
| H | -4.8934 | 7.2362  | 1.8346  |            |         |         |         |
| H | -4.6424 | 6.0115  | 0.5982  |            |         |         |         |
| H | -3.8511 | -1.4026 | -3.6238 |            |         |         |         |
| H | -3.4837 | 7.1368  | -1.6748 |            |         |         |         |
| H | -3.5268 | 3.2153  | -2.9783 |            |         |         |         |
| H | -3.1950 | -0.3381 | -5.8231 |            |         |         |         |
| H | -1.0914 | 1.7507  | 2.3699  |            |         |         |         |
| H | -4.4682 | -6.3341 | -1.7727 |            |         |         |         |
| H | -3.7630 | 4.6811  | 4.1057  |            |         |         |         |
|   |         |         |         | <b>19:</b> |         |         |         |
|   |         |         |         | -6819.1694 |         |         |         |
|   |         |         |         | Cr         | 1.1537  | -0.9752 | -2.8566 |
|   |         |         |         | Cr         | -2.8371 | -1.4400 | 2.7439  |
|   |         |         |         | Cl         | 1.7948  | 0.6085  | -4.5723 |
|   |         |         |         | Cl         | -4.6963 | -1.9595 | 4.0190  |
|   |         |         |         | O          | 1.4275  | -4.4099 | 0.5576  |
|   |         |         |         | O          | 0.9100  | -2.1486 | -1.3454 |
|   |         |         |         | O          | 0.7470  | -2.2856 | -4.2288 |
|   |         |         |         | O          | -6.8528 | 3.6050  | 0.0639  |
|   |         |         |         | O          | -5.4016 | 3.9706  | -1.6759 |
|   |         |         |         | O          | -3.1014 | 0.4729  | 2.7090  |

|   |         |         |         |   |         |         |         |
|---|---------|---------|---------|---|---------|---------|---------|
| O | -1.9193 | 5.1444  | -1.7991 | C | -4.1831 | 2.5757  | 2.4341  |
| O | -1.5724 | -1.4528 | 4.1928  | C | -4.0189 | 1.1870  | 2.0874  |
| O | -2.7238 | 4.8224  | 0.3236  | C | -3.3004 | 3.2278  | 3.5121  |
| O | -0.6208 | -0.1787 | -2.6797 | C | -3.7126 | -2.9332 | 0.3554  |
| O | -1.2225 | -1.1792 | 1.4761  | C | -4.2135 | -5.8313 | -0.0312 |
| N | 3.0946  | -1.6085 | -2.8163 | C | -3.3931 | -3.9840 | 1.4580  |
| N | 1.8694  | 0.4049  | -1.5250 | C | -3.1609 | 0.7055  | -3.6388 |
| N | -3.9107 | -1.6274 | 1.0283  | C | -3.8751 | 7.4383  | 0.3918  |
| N | -2.3939 | -3.3802 | 2.3572  | C | -3.0287 | -5.3288 | 0.8190  |
| C | 2.7143  | -3.8267 | 0.4448  | C | -3.6315 | -0.3944 | -2.6526 |
| C | 0.7143  | -4.4716 | -0.6735 | C | -2.5255 | 0.0627  | -4.8988 |
| C | -1.0215 | -3.4759 | -2.1450 | C | -1.8133 | 3.1580  | 3.0767  |
| C | -0.0186 | -3.1699 | -1.0280 | C | -3.6458 | 4.7208  | 3.7096  |
| C | 6.1319  | -0.1314 | -0.8913 | C | -3.0067 | 6.9755  | -0.7870 |
| C | 5.3180  | 0.5142  | 0.2455  | C | -2.4618 | 2.9461  | -2.6365 |
| C | 5.3112  | -1.2179 | -1.6122 | C | -2.5621 | 5.5270  | -0.6528 |
| C | 3.9976  | 1.0993  | -0.2882 | C | -2.1582 | 1.6173  | -2.9122 |
| C | 3.9908  | -0.6453 | -2.1496 | C | -1.2468 | -3.9169 | 2.6274  |
| C | 3.4695  | -2.7831 | -3.1996 | C | -1.5677 | 3.7729  | -1.9421 |
| C | 3.2591  | -4.9724 | -4.2492 | C | 0.0524  | 0.8211  | 5.0811  |
| C | 3.1801  | 0.0048  | -0.9879 | C | -0.4485 | -2.1398 | 4.2548  |
| C | 2.6728  | -3.7147 | -3.9667 | C | -0.7797 | -0.6404 | 6.9649  |
| C | 2.6477  | -5.8696 | -5.1056 | C | -0.7705 | -4.8388 | -7.4429 |
| C | 1.4568  | -5.4847 | -5.7606 | C | -0.2382 | -3.3369 | 3.4875  |
| C | 1.3988  | -3.3709 | -4.5469 | C | -0.0472 | -2.4721 | -7.0856 |
| C | 1.2985  | 1.5309  | -1.2548 | C | -0.8912 | 1.0924  | -2.4738 |
| C | 0.8327  | -4.2595 | -5.5379 | C | -1.6386 | -3.5826 | -5.4700 |
| C | 1.6453  | -0.0450 | 6.7926  | C | 0.3883  | -0.4055 | 5.9707  |
| C | 2.0218  | -3.5360 | 4.3642  | C | 0.6043  | -1.6675 | 5.1152  |
| C | 1.8046  | -2.3778 | 5.1393  | C | -0.3892 | -3.8033 | -6.3607 |
| C | 0.0069  | 1.9567  | -1.7528 | C | 1.0033  | -4.0105 | 3.5557  |
| C | -7.5077 | 5.1721  | -1.5878 | C | -0.3586 | 3.2985  | -1.4894 |
| C | -7.5407 | 6.4704  | -0.7384 | C | -0.1867 | -0.1399 | 1.6697  |
| C | -6.4573 | 4.1902  | -1.1159 | C | -1.0444 | -0.1103 | 0.4648  |
| C | -6.1957 | 7.2315  | -0.7066 | C | 1.2130  | -0.6794 | 1.6226  |
| C | -5.9041 | 2.7657  | 0.7132  | H | -0.4406 | 0.5272  | 2.4833  |
| C | -5.7676 | 1.4470  | 0.3548  | H | 3.4126  | -4.5156 | -0.0659 |
| C | -5.1313 | 3.3202  | 1.7419  | H | 2.6692  | -2.8898 | -0.1180 |
| C | -3.4826 | 2.5102  | 4.8739  | H | 3.0656  | -3.6427 | 1.4667  |
| C | -4.5907 | -4.8081 | -1.1193 | H | -0.0198 | -5.2804 | -0.5425 |
| C | -4.7005 | -0.7196 | 0.5538  | H | 1.3847  | -4.7408 | -1.5057 |
| C | -4.8768 | -3.4125 | -0.5268 | H | -0.5419 | -4.0015 | -2.9730 |
| C | -4.4208 | 1.4790  | -4.0883 | H | -1.8303 | -4.1111 | -1.7617 |
| C | -4.8344 | 0.6325  | 1.0410  | H | -1.4428 | -2.5475 | -2.5350 |
| C | -5.2550 | 6.7528  | 0.4148  | H | -0.5789 | -2.8686 | -0.1234 |



|   |         |         |         |            |         |         |         |
|---|---------|---------|---------|------------|---------|---------|---------|
| H | 7.0595  | -0.5664 | -0.4964 | H          | -3.4042 | 3.3781  | -2.9385 |
| H | 5.9051  | 1.2987  | 0.7402  | H          | -3.2582 | -0.6104 | -5.3659 |
| H | 6.4176  | 0.6462  | -1.6153 | H          | -1.5002 | 2.1202  | 2.9861  |
| H | 5.9014  | -1.6460 | -2.4315 | H          | -3.9625 | -6.7956 | -0.4910 |
| H | 5.0872  | -0.2491 | 1.0035  | H          | -4.6862 | 4.8513  | 4.0365  |
| H | 5.0781  | -2.0317 | -0.9088 | H          | -2.7821 | -6.0586 | 1.6005  |
| H | 4.4840  | -3.1287 | -2.9805 | H          | -4.0046 | 8.5289  | 0.3395  |
| H | 4.2124  | -5.2144 | -3.7828 | H          | -4.1526 | 0.0853  | -1.8180 |
| H | 4.2053  | 1.9081  | -1.0036 | H          | -5.0784 | -5.9965 | 0.6291  |
| H | 3.4230  | 1.5281  | 0.5426  | H          | -2.2541 | 0.8421  | -5.6216 |
| H | 4.1885  | 0.1409  | -2.8908 | H          | -0.9050 | 0.6834  | 4.5793  |
| H | 2.9832  | -0.8008 | -0.2729 | H          | -1.1888 | 3.6470  | 3.8371  |
| H | 3.0919  | -6.8388 | -5.3089 | H          | -2.8105 | -2.8273 | -0.2626 |
| H | 1.8044  | 2.2558  | -0.6126 | H          | -1.6155 | -4.4455 | -8.0211 |
| H | 1.9308  | -0.8595 | 7.4706  | H          | -2.9902 | 5.1310  | 4.4874  |
| H | 2.4976  | 0.1826  | 6.1388  | H          | -1.6953 | -0.8905 | 6.4238  |
| H | 1.0274  | -6.1742 | -6.4782 | H          | -0.9189 | -2.1413 | -7.6677 |
| H | 1.4272  | 0.8442  | 7.3964  | H          | -2.7824 | -0.9631 | -2.2696 |
| H | 2.9792  | -4.0455 | 4.4051  | H          | -3.3461 | 7.2099  | 1.3252  |
| H | 2.6133  | -2.0285 | 5.7704  | H          | -3.4861 | 5.2845  | 2.7827  |
| H | 0.3197  | 3.9485  | -0.9451 | H          | -2.1015 | 7.5925  | -0.8752 |
| H | -8.4914 | 4.6895  | -1.5431 | H          | -1.6781 | 3.6627  | 2.1153  |
| H | -8.3235 | 7.1135  | -1.1620 | H          | -2.1382 | -5.2030 | 0.1881  |
| H | -7.2777 | 5.4192  | -2.6291 | H          | -1.6292 | -0.5031 | -4.6458 |
| H | -7.8454 | 6.2198  | 0.2865  | H          | -0.9813 | -4.8740 | 2.1778  |
| H | -6.3544 | 1.0322  | -0.4582 | H          | -2.4879 | -3.2978 | -6.1071 |
| H | -5.7894 | -3.4391 | 0.0861  | H          | -0.0072 | 1.7217  | 5.7069  |
| H | -5.6998 | 7.1243  | -1.6820 | H          | -0.9491 | 0.2714  | 7.5550  |
| H | -6.3857 | 8.3059  | -0.5664 | H          | -1.0742 | -5.7953 | -6.9965 |
| H | -3.2209 | 1.4541  | 4.7968  | H          | 0.0644  | -5.0216 | -8.1315 |
| H | -5.4711 | -5.1548 | -1.6754 | H          | 0.2174  | -1.6931 | -6.3669 |
| H | -4.5240 | 2.5922  | 5.2114  | H          | 0.8381  | 0.9748  | 4.3291  |
| H | -5.0965 | 0.7814  | -4.5998 | H          | 0.7947  | -2.6244 | -7.7738 |
| H | -5.2808 | 4.3642  | 1.9708  | H          | -1.4571 | -2.7877 | -4.7491 |
| H | -5.3165 | -0.9497 | -0.3153 | H          | -0.5334 | -1.4600 | 7.6530  |
| H | -3.7661 | -4.7269 | -1.8381 | H          | 1.1535  | -4.8757 | 2.9195  |
| H | -4.9504 | 1.9215  | -3.2354 | H          | -1.8975 | -4.5041 | -4.9320 |
| H | -5.0406 | -2.7057 | -1.3490 | H          | -0.6451 | -0.5047 | -0.4632 |
| H | -4.1587 | 2.2809  | -4.7902 | H          | -1.8685 | 0.5939  | 0.4122  |
| H | -4.3022 | -4.0976 | 2.0649  | H          | 1.2968  | -1.3595 | 0.7695  |
| H | -2.8332 | 2.9857  | 5.6220  | H          | 1.4589  | -1.2044 | 2.5510  |
| H | -5.7430 | 6.9393  | 1.3824  | H          | 1.9193  | 0.1506  | 1.4908  |
| H | -5.0929 | 5.6764  | 0.3444  |            |         |         |         |
| H | -4.3260 | -1.0796 | -3.1604 |            |         |         |         |
| H | -3.5382 | 7.0750  | -1.7411 |            |         |         |         |
|   |         |         |         | <b>20:</b> |         |         |         |
|   |         |         |         | -6819.1526 |         |         |         |

|    |         |         |         |   |         |         |         |
|----|---------|---------|---------|---|---------|---------|---------|
| Cr | -2.6476 | -1.1810 | 3.1666  | C | -4.5368 | -5.0808 | 2.7890  |
| Cr | 0.9216  | -1.0711 | -2.8988 | C | -3.8897 | 7.7958  | -1.0464 |
| Cl | -4.3410 | -0.5297 | 4.7497  | C | -3.6860 | -0.1020 | -3.8977 |
| Cl | 1.4348  | 0.8138  | -4.4320 | C | -4.3359 | -3.5614 | 2.9257  |
| O  | -1.3603 | -1.9867 | 1.8430  | C | -5.8440 | -5.3985 | 2.0335  |
| O  | -1.0041 | -0.6033 | -2.8369 | C | -4.3738 | -2.8712 | 1.5321  |
| O  | -2.0044 | 5.5750  | -0.6912 | C | -1.9986 | 3.4940  | 2.9568  |
| O  | -1.2282 | -1.2072 | 4.4944  | C | -3.3343 | 1.4609  | 2.0437  |
| O  | -3.0396 | 4.5614  | -2.4946 | C | -3.1957 | 2.8862  | 2.1930  |
| O  | -2.3995 | 0.6424  | 2.5258  | C | -5.0942 | 7.2328  | -0.2646 |
| O  | -6.3803 | 3.4000  | -1.6451 | C | -4.4791 | 0.9442  | 1.3488  |
| O  | -6.2962 | 4.1108  | 0.5549  | C | -5.0608 | 0.4720  | -4.3173 |
| O  | 0.9735  | -2.2482 | -4.4853 | C | -5.6785 | -3.1902 | 0.7834  |
| O  | 0.6736  | -2.5185 | -1.5264 | C | -4.7235 | -0.4652 | 1.1705  |
| O  | 2.5187  | -5.2157 | -1.2292 | C | -5.8799 | -4.7141 | 0.6562  |
| N  | -3.0837 | -3.1268 | 3.5952  | C | -2.0174 | 2.9992  | 4.4288  |
| N  | -4.0859 | -1.4342 | 1.7560  | C | -4.1924 | 3.7006  | 1.6619  |
| N  | 1.1703  | 0.2693  | -1.3909 | C | -5.4474 | 1.8189  | 0.8032  |
| N  | 2.9619  | -1.1932 | -2.7524 | C | -5.2978 | 3.1741  | 0.9776  |
| C  | 1.0298  | -2.7043 | 1.9562  | C | -6.4370 | 7.3322  | -1.0218 |
| C  | -0.7228 | -2.0638 | 0.1534  | C | -6.7730 | 4.1451  | -0.7448 |
| C  | 0.0115  | -1.7413 | 1.3925  | C | -7.6031 | 6.5799  | -0.3297 |
| C  | -1.3066 | 2.9249  | -1.7710 | C | -7.8834 | 5.1639  | -0.8826 |
| C  | -0.5323 | -4.5863 | 5.7984  | C | -0.8111 | 1.6046  | -1.8965 |
| C  | 0.3924  | -3.0565 | -7.2453 | C | 1.0611  | -3.0111 | 6.6750  |
| C  | 0.4723  | -1.9358 | 6.0106  | C | 0.5810  | -4.3335 | 6.5755  |
| C  | 0.9899  | -0.4901 | 6.1865  | C | 2.2259  | -0.4253 | 7.1163  |
| C  | -0.7298 | -3.7666 | -6.4457 | C | 1.7667  | -3.1976 | -6.5532 |
| C  | -1.5149 | 0.6172  | -2.6619 | C | 0.4247  | 1.3210  | -1.2145 |
| C  | 0.0595  | -1.5429 | -7.3765 | C | 1.9933  | -2.6578 | -5.2313 |
| C  | -1.1775 | -3.5442 | 5.0883  | C | 2.8481  | -3.7733 | -7.2180 |
| C  | 0.3941  | -3.6608 | -8.6713 | C | 4.1572  | -3.7999 | -6.6930 |
| C  | -0.1292 | 0.3808  | 6.8242  | C | 3.3468  | -2.5848 | -4.7474 |
| C  | -0.6710 | -2.2024 | 5.1700  | C | 2.4445  | 0.0336  | -0.6797 |
| C  | 1.4059  | 0.1172  | 4.8175  | C | 4.4009  | -3.1789 | -5.4859 |
| C  | -2.4902 | 3.2470  | -2.3970 | C | 3.7335  | -1.8375 | -3.5777 |
| C  | -2.3580 | -3.9053 | 4.3402  | C | 3.5212  | -0.2254 | -1.7648 |
| C  | -2.8115 | 0.9561  | -3.1933 | C | 2.9000  | 1.1313  | 0.2939  |
| C  | -2.7470 | 5.6224  | -1.6811 | C | 4.8590  | -0.6212 | -1.1084 |
| C  | -3.2484 | 2.2709  | -3.0630 | C | 4.2417  | 0.7505  | 0.9515  |
| C  | -3.4310 | 6.8756  | -2.1920 | C | 5.3207  | 0.4582  | -0.1081 |
| C  | -2.0447 | 5.0412  | 2.9678  | C | 0.4222  | -3.9400 | -1.7285 |
| C  | -0.6657 | 3.0758  | 2.2770  | C | -0.8426 | -4.1790 | -2.5676 |
| C  | -2.9678 | -0.6233 | -5.1709 | C | 1.6160  | -4.7389 | -2.2797 |
| C  | -3.9463 | -1.2865 | -2.9253 | C | 3.5230  | -4.2602 | -0.8178 |

|   |         |         |         |   |         |         |         |
|---|---------|---------|---------|---|---------|---------|---------|
| H | 1.9905  | -2.5925 | 1.4424  | H | -5.1945 | 7.7749  | 0.6874  |
| H | 1.1765  | -2.5167 | 3.0239  | H | -1.1654 | 3.4286  | 4.9740  |
| H | 0.6905  | -3.7365 | 1.8298  | H | -5.1530 | -3.1327 | 3.5234  |
| H | -1.1928 | -1.2893 | -0.4333 | H | -4.9590 | 1.2685  | -5.0643 |
| H | -0.9730 | -3.0921 | -0.0273 | H | -5.6598 | -2.7385 | -0.2159 |
| H | -0.4936 | -4.8274 | -6.2960 | H | -5.6165 | 0.8724  | -3.4620 |
| H | -0.9319 | -5.5950 | 5.7206  | H | -5.0886 | -5.1343 | 0.0183  |
| H | -0.3874 | 0.0017  | 7.8210  | H | -5.5417 | -0.7030 | 0.4885  |
| H | -0.8603 | -3.2916 | -5.4759 | H | -4.1378 | 4.7735  | 1.7754  |
| H | 0.7849  | -1.0485 | -8.0350 | H | -5.6590 | -0.3292 | -4.7676 |
| H | 2.2100  | -0.4752 | 4.3607  | H | -2.9401 | 3.3175  | 4.9281  |
| H | 0.0850  | -1.0406 | -6.4072 | H | -6.8329 | -4.9200 | 0.1516  |
| H | 1.1337  | -3.1773 | -9.3205 | H | -1.9574 | 1.9113  | 4.4790  |
| H | 0.5906  | -4.7406 | -8.6632 | H | -6.6973 | 8.3973  | -1.1174 |
| H | 0.2177  | 1.4163  | 6.9323  | H | -6.3215 | 6.9566  | -2.0484 |
| H | 1.7794  | 1.1392  | 4.9644  | H | -6.5277 | -2.7513 | 1.3279  |
| H | -1.6764 | -3.7011 | -6.9981 | H | -6.2972 | 1.4155  | 0.2656  |
| H | -2.6507 | -4.9525 | 4.4492  | H | -7.4135 | 6.5127  | 0.7473  |
| H | -2.0100 | -1.0776 | -4.9148 | H | -8.1337 | 5.2099  | -1.9470 |
| H | -3.6828 | -5.5125 | 2.2464  | H | -8.5312 | 7.1535  | -0.4516 |
| H | -0.6312 | 3.4606  | 1.2510  | H | -8.7565 | 4.7511  | -0.3565 |
| H | -2.7054 | 7.4016  | -2.8292 | H | -0.7508 | 3.6604  | -1.2077 |
| H | -2.0221 | 5.4532  | 1.9532  | H | 1.9240  | -2.8348 | 7.3061  |
| H | -3.0439 | 7.9347  | -0.3622 | H | 1.0784  | -5.1339 | 7.1138  |
| H | -3.0003 | -1.7405 | -2.6260 | H | 2.5441  | 0.6191  | 7.2125  |
| H | -0.9406 | -1.4160 | -7.8122 | H | 2.6920  | -4.2066 | -8.1982 |
| H | -1.0263 | 0.3734  | 6.2036  | H | 3.0726  | -0.9964 | 6.7150  |
| H | -1.1651 | 5.4155  | 3.5052  | H | 2.0016  | -0.7979 | 8.1235  |
| H | -0.5932 | -3.5063 | -9.1225 | H | 0.7383  | 2.0857  | -0.5017 |
| H | -3.5247 | -3.2642 | 0.9558  | H | 4.9605  | -4.2657 | -7.2550 |
| H | 0.1805  | 3.5005  | 2.8328  | H | 2.3063  | -0.9036 | -0.1267 |
| H | 0.5546  | 0.1495  | 4.1368  | H | 3.6490  | 0.7156  | -2.3187 |
| H | -2.7841 | 0.2006  | -5.8700 | H | 2.1385  | 1.2886  | 1.0679  |
| H | -6.7005 | -5.0555 | 2.6322  | H | 3.0141  | 2.0809  | -0.2483 |
| H | -4.4758 | -0.9357 | -2.0296 | H | 5.4119  | -3.1248 | -5.0861 |
| H | -4.1423 | 8.7845  | -1.4560 | H | 4.8154  | -1.7776 | -3.4322 |
| H | -4.5675 | -5.5532 | 3.7780  | H | 4.7369  | -1.5825 | -0.5899 |
| H | -2.9330 | 5.4178  | 3.4901  | H | 4.0963  | -0.1396 | 1.5823  |
| H | -5.9508 | -6.4848 | 1.9218  | H | 5.6372  | -0.7602 | -1.8686 |
| H | -0.5721 | 1.9885  | 2.2614  | H | 5.5510  | 1.3841  | -0.6566 |
| H | -3.5955 | -1.3693 | -5.6760 | H | 4.5699  | 1.5569  | 1.6190  |
| H | -4.2016 | 2.5861  | -3.4632 | H | 6.2534  | 0.1378  | 0.3752  |
| H | -4.2613 | 6.5798  | -2.8388 | H | 0.2602  | -4.3745 | -0.7273 |
| H | -4.5669 | -2.0472 | -3.4182 | H | -1.6822 | -3.6068 | -2.1637 |
| H | -4.8917 | 6.1891  | 0.0042  | H | -1.1138 | -5.2429 | -2.5698 |

|            |         |         |         |   |         |         |         |
|------------|---------|---------|---------|---|---------|---------|---------|
| H          | -0.6829 | -3.8488 | -3.5938 | C | 0.2690  | 1.4414  | -0.9204 |
| H          | 2.1696  | -4.1727 | -3.0334 | C | 1.6620  | -3.1383 | -6.1557 |
| H          | 1.2445  | -5.6600 | -2.7401 | C | 2.7345  | -0.3967 | 5.9796  |
| H          | 4.0722  | -4.7282 | 0.0032  | C | 0.7628  | -4.1824 | 6.2705  |
| H          | 3.0712  | -3.3218 | -0.4806 | C | 1.3197  | -2.8901 | 6.1757  |
| H          | 4.2197  | -4.0387 | -1.6405 | C | -0.9304 | 1.7402  | -1.6582 |
| H          | 0.2949  | -0.6920 | 1.4965  | C | -7.7186 | 4.7315  | -1.2035 |
|            |         |         |         | C | -7.5713 | 6.0510  | -0.4214 |
|            |         |         |         | C | -6.5400 | 3.7674  | -1.1495 |
| <b>21:</b> |         |         |         | C | -6.4515 | 6.9733  | -0.9687 |
| -6819.1526 |         |         |         | C | -4.9052 | 2.8978  | 0.4324  |
| Cr         | 0.7968  | -0.8433 | -2.6886 | C | -4.9679 | 1.5432  | 0.1768  |
| Cr         | -2.4937 | -1.2015 | 2.9968  | C | -3.8802 | 3.4386  | 1.2205  |
| Cl         | 1.3998  | 0.8607  | -4.1524 | C | -1.9299 | 2.5935  | 4.1154  |
| Cl         | -4.3779 | -0.1957 | 4.1286  | C | -5.5661 | -4.9377 | 0.6185  |
| O          | 1.9638  | -4.9529 | -1.0260 | C | -4.2607 | -0.7288 | 0.6461  |
| O          | 0.2715  | -2.3309 | -1.1431 | C | -5.2817 | -3.4279 | 0.5209  |
| O          | 0.8364  | -2.1313 | -4.1519 | C | -4.9348 | 0.7321  | -4.4950 |
| O          | -5.9441 | 3.8046  | 0.0754  | C | -4.0009 | 0.6936  | 0.7517  |
| O          | -6.2371 | 3.0216  | -2.0635 | C | -5.1910 | 6.9899  | -0.0840 |
| O          | -1.9813 | 0.4360  | 2.0295  | C | -2.8753 | 2.6432  | 1.7690  |
| O          | -3.1693 | 4.6964  | -2.2137 | C | -2.9172 | 1.2274  | 1.5294  |
| O          | -1.3466 | -1.0363 | 4.5580  | C | -1.8136 | 3.2402  | 2.7103  |
| O          | -1.8934 | 5.7134  | -0.5874 | C | -4.0938 | -3.0408 | 1.4097  |
| O          | -1.0797 | -0.4202 | -2.7173 | C | -5.8224 | -5.3523 | 2.0801  |
| O          | -1.1859 | -2.3112 | 2.1655  | C | -4.3256 | -3.4805 | 2.8989  |
| N          | 2.7942  | -1.1371 | -2.3488 | C | -3.6289 | 0.1299  | -3.9319 |
| N          | 1.0174  | 0.4035  | -1.1217 | C | -4.0225 | 7.7718  | -0.7087 |
| N          | -3.7540 | -1.6112 | 1.4391  | C | -4.6234 | -4.9845 | 2.9740  |
| N          | -3.1519 | -3.0175 | 3.6576  | C | -4.0213 | -1.0524 | -3.0055 |
| C          | 3.0931  | -4.1304 | -0.8197 | C | -2.7966 | -0.3971 | -5.1280 |
| C          | 1.1038  | -4.4783 | -2.0551 | C | -0.3870 | 2.9937  | 2.1605  |
| C          | -1.3174 | -3.7054 | -2.4102 | C | -1.9842 | 4.7668  | 2.8753  |
| C          | -0.0950 | -3.7235 | -1.4912 | C | -3.4177 | 7.0327  | -1.9203 |
| C          | 5.0261  | 0.3172  | 0.4953  | C | -3.2844 | 2.4609  | -2.9504 |
| C          | 3.8838  | 0.6637  | 1.4700  | C | -2.7274 | 5.7517  | -1.4770 |
| C          | 4.5796  | -0.7380 | -0.5377 | C | -2.8274 | 1.1579  | -3.1181 |
| C          | 2.6338  | 1.1500  | 0.7113  | C | -2.4587 | -3.7634 | 4.4511  |
| C          | 3.3493  | -0.2270 | -1.3095 | C | -2.5927 | 3.4013  | -2.1680 |
| C          | 3.5816  | -1.8013 | -3.1325 | C | 1.3169  | 0.0286  | 3.9751  |
| C          | 4.2670  | -3.1554 | -5.0238 | C | -0.6727 | -2.0488 | 5.0482  |
| C          | 2.2074  | 0.0957  | -0.3148 | C | 0.4617  | 0.6019  | 6.2856  |
| C          | 3.2084  | -2.5256 | -4.3223 | C | 0.3143  | -3.6226 | -8.2749 |
| C          | 4.0418  | -3.7843 | -6.2317 | C | -1.2148 | -3.3834 | 5.0901  |
| C          | 2.7464  | -3.7446 | -6.7888 | C | -0.0563 | -1.5065 | -6.9970 |
| C          | 1.8686  | -2.5655 | -4.8488 |   |         |         |         |

|   |         |         |         |   |         |         |         |
|---|---------|---------|---------|---|---------|---------|---------|
| C | -1.5808 | 0.7918  | -2.5120 | H | -5.7715 | 1.1258  | -0.4168 |
| C | -0.8219 | -3.7305 | -6.0616 | H | -6.1685 | -2.8631 | 0.8445  |
| C | 1.2798  | -0.4252 | 5.4597  | H | -6.1872 | 6.6502  | -1.9857 |
| C | 0.6472  | -1.8232 | 5.5802  | H | -6.8233 | 8.0045  | -1.0610 |
| C | 0.2966  | -3.0116 | -6.8552 | H | -1.7356 | 1.5220  | 4.0771  |
| C | -0.4896 | -4.4157 | 5.7268  | H | -6.4265 | -5.1994 | -0.0111 |
| C | -1.4485 | 3.0445  | -1.4868 | H | -2.9377 | 2.7377  | 4.5192  |
| C | -0.1109 | -1.8947 | 1.3619  | H | -5.4804 | -0.0537 | -5.0324 |
| C | -0.6579 | -1.8383 | -0.0863 | H | -3.9019 | 4.5016  | 1.4164  |
| C | 1.0491  | -2.8737 | 1.6122  | H | -4.9904 | -1.0205 | -0.1107 |
| H | 0.2247  | -0.8831 | 1.6375  | H | -4.6981 | -5.4940 | 0.2338  |
| H | 3.7813  | -4.1748 | -1.6812 | H | -5.5764 | 1.1248  | -3.6980 |
| H | 2.8048  | -3.0871 | -0.6668 | H | -5.0742 | -3.1478 | -0.5203 |
| H | 3.6045  | -4.5023 | 0.0751  | H | -4.7186 | 1.5431  | -5.2028 |
| H | 0.7207  | -5.3654 | -2.5760 | H | -5.1823 | -2.9016 | 3.2709  |
| H | 1.6455  | -3.8690 | -2.7785 | H | -1.2001 | 3.0669  | 4.7878  |
| H | -1.1702 | -2.9759 | -3.2036 | H | -5.4516 | 7.4274  | 0.8901  |
| H | -1.4849 | -4.6956 | -2.8506 | H | -4.8761 | 5.9598  | 0.1129  |
| H | -2.2159 | -3.4192 | -1.8540 | H | -4.5368 | -1.8246 | -3.5934 |
| H | -0.3401 | -4.2124 | -0.5413 | H | -4.1782 | 6.8071  | -2.6721 |
| H | 5.8994  | -0.0532 | 1.0471  | H | -4.2096 | 2.7827  | -3.4037 |
| H | 4.2080  | 1.4301  | 2.1848  | H | -3.4035 | -1.1048 | -5.7113 |
| H | 5.3372  | 1.2283  | -0.0378 | H | -0.2336 | 1.9270  | 1.9861  |
| H | 5.4098  | -0.9583 | -1.2196 | H | -6.0193 | -6.4307 | 2.1429  |
| H | 3.6177  | -0.2275 | 2.0543  | H | -2.9497 | 5.0056  | 3.3402  |
| H | 4.3126  | -1.6708 | -0.0234 | H | -4.8228 | -5.2742 | 4.0133  |
| H | 4.6545  | -1.8047 | -2.9236 | H | -4.3647 | 8.7674  | -1.0251 |
| H | 5.2650  | -3.1242 | -4.5914 | H | -4.6992 | -0.6926 | -2.2222 |
| H | 2.8507  | 2.0955  | 0.1930  | H | -6.7189 | -4.8322 | 2.4498  |
| H | 1.8161  | 1.3327  | 1.4159  | H | -2.5057 | 0.4346  | -5.7821 |
| H | 3.6041  | 0.7092  | -1.8276 | H | 0.3075  | 0.1103  | 3.5715  |
| H | 1.9777  | -0.8305 | 0.2197  | H | 0.3498  | 3.3461  | 2.8953  |
| H | 4.8494  | -4.2735 | -6.7658 | H | -3.1851 | -3.5621 | 1.0762  |
| H | 0.5309  | 2.1531  | -0.1422 | H | -0.6699 | -3.4702 | -8.7335 |
| H | 2.7872  | -0.6470 | 7.0475  | H | -1.1893 | 5.1369  | 3.5348  |
| H | 3.3711  | -1.0992 | 5.4250  | H | -0.5677 | 0.6461  | 5.9255  |
| H | 2.6014  | -4.1975 | -7.7618 | H | -1.0631 | -1.4030 | -7.4234 |
| H | 3.1345  | 0.6160  | 5.8437  | H | -3.1341 | -1.4880 | -2.5410 |
| H | 1.3204  | -4.9827 | 6.7470  | H | -3.2275 | 7.9086  | 0.0337  |
| H | 2.3152  | -2.7329 | 6.5752  | H | -1.9112 | 5.2874  | 1.9126  |
| H | -0.9381 | 3.7427  | -0.8442 | H | -2.6535 | 7.6642  | -2.3941 |
| H | -8.5890 | 4.1782  | -0.8186 | H | -0.2401 | 3.5550  | 1.2292  |
| H | -8.5388 | 6.5681  | -0.4700 | H | -3.7321 | -5.5387 | 2.6439  |
| H | -7.9084 | 4.9334  | -2.2637 | H | -1.8923 | -0.9003 | -4.7878 |
| H | -7.3803 | 5.8233  | 0.6343  | H | -2.7761 | -4.7927 | 4.6424  |

|            |         |         |         |   |         |         |         |
|------------|---------|---------|---------|---|---------|---------|---------|
| H          | -1.7517 | -3.7102 | -6.6465 | C | 0.1585  | -4.0993 | 2.0944  |
| H          | 1.8127  | 1.0071  | 3.9046  | C | -1.3859 | -5.7034 | -5.8640 |
| H          | 0.9184  | 1.5979  | 6.1927  | C | 0.2068  | -1.4060 | 5.4415  |
| H          | 0.5171  | -4.7023 | -8.2496 | C | 0.4114  | -2.8428 | 2.7462  |
| H          | 1.0666  | -3.1378 | -8.9100 | C | 1.9299  | -0.3108 | 3.9321  |
| H          | -0.0325 | -0.9999 | -6.0308 | C | -2.0290 | 4.1955  | -2.5509 |
| H          | 1.8812  | -0.6938 | 3.3725  | C | -1.0380 | -4.3511 | 1.3223  |
| H          | 0.6615  | -1.0141 | -7.6653 | C | -2.5078 | 1.9906  | -3.4959 |
| H          | -0.9967 | -3.2305 | -5.1135 | C | -2.5104 | 6.2675  | -1.3897 |
| H          | 0.4614  | 0.3148  | 7.3457  | C | -2.7829 | 3.3488  | -3.3797 |
| H          | -0.9257 | -5.4131 | 5.7589  | C | -3.2059 | 7.5967  | -1.6513 |
| H          | -0.5509 | -4.7777 | -5.8703 | C | -1.9962 | 4.4453  | 3.3783  |
| H          | -1.5456 | -2.4695 | -0.1087 | C | -0.4077 | 3.0566  | 2.0466  |
| H          | -0.9543 | -0.8320 | -0.3601 | C | -2.3021 | 0.4113  | -5.4622 |
| H          | 0.8103  | -3.8779 | 1.2478  | C | -4.1041 | 0.0211  | -3.7135 |
| H          | 1.1902  | -2.9222 | 2.6976  | C | -3.3502 | -5.2460 | -0.2191 |
| H          | 1.9899  | -2.5592 | 1.1488  | C | -3.6031 | 8.3162  | -0.3513 |
|            |         |         |         | C | -3.2932 | 1.0990  | -4.4814 |
|            |         |         |         | C | -3.2412 | -3.8455 | 0.4040  |
| <b>F1:</b> |         |         |         | C | -4.7859 | -5.4813 | -0.7314 |
| -6708.3274 |         |         |         | C | -3.6137 | -2.7429 | -0.6277 |
| Cr         | -1.7933 | -1.4550 | 1.2799  | C | -1.7594 | 3.0255  | 2.8086  |
| Cr         | 0.2784  | -0.8781 | -2.0954 | C | -2.8875 | 1.2778  | 1.2436  |
| Cl         | -3.3089 | -1.6826 | 3.1089  | C | -2.8968 | 2.5867  | 1.8601  |
| Cl         | 1.5443  | -0.1582 | -3.9846 | C | -4.7475 | 7.6215  | 0.4175  |
| O          | -1.2802 | 0.1279  | -2.6538 | C | -4.0249 | 0.8873  | 0.4550  |
| O          | -2.0546 | 5.9162  | -0.3176 | C | -4.2965 | 1.9176  | -5.3307 |
| O          | -0.2592 | -1.7519 | 2.4759  | C | -5.0387 | -2.9766 | -1.1638 |
| O          | -2.4398 | 5.5546  | -2.5548 | C | -4.1667 | -0.4192 | -0.1440 |
| O          | -1.8451 | 0.4868  | 1.3983  | C | -5.2086 | -4.3975 | -1.7384 |
| O          | -5.4611 | 4.7085  | -1.3560 | C | -1.6672 | 2.0364  | 4.0026  |
| O          | -6.1685 | 3.9219  | 0.6838  | C | -3.9767 | 3.4297  | 1.6099  |
| O          | -0.1896 | -2.5545 | -3.0100 | C | -5.0929 | 1.7879  | 0.2367  |
| O          | -0.5762 | -1.5369 | -0.3598 | C | -5.0549 | 3.0388  | 0.8044  |
| N          | -1.9419 | -3.4777 | 1.0099  | C | -6.1396 | 7.8221  | -0.2163 |
| N          | -3.3895 | -1.4359 | 0.0370  | C | -6.2590 | 4.7089  | -0.4393 |
| N          | 0.9926  | 0.7124  | -1.0725 | C | -7.2409 | 6.9291  | 0.4078  |
| N          | 1.9753  | -1.7676 | -1.3872 | C | -7.4881 | 5.5957  | -0.3495 |
| C          | -0.9411 | 3.7136  | -1.8597 | C | -0.6347 | 2.3327  | -1.9175 |
| C          | 1.0362  | -5.1977 | 2.2877  | C | 2.2760  | -3.9224 | 3.8804  |
| C          | -1.0491 | -4.4543 | -5.0119 | C | 2.1284  | -5.1244 | 3.1364  |
| C          | 1.4485  | -2.8134 | 3.7561  | C | 2.6530  | -1.8176 | 5.7905  |
| C          | 1.5653  | -1.6026 | 4.7089  | C | -0.1187 | -4.7937 | -3.8245 |
| C          | -2.3921 | -3.8506 | -4.5263 | C | 0.5059  | 1.9090  | -1.1402 |
| C          | -1.4492 | 1.4331  | -2.6858 | C | 0.3572  | -3.7414 | -2.9542 |
| C          | -0.3250 | -3.4343 | -5.9371 |   |         |         |         |

|   |         |         |         |   |         |         |         |
|---|---------|---------|---------|---|---------|---------|---------|
| C | 0.3504  | -6.0877 | -3.6182 | H | 1.1861  | -0.0990 | 3.1632  |
| C | 1.3330  | -6.4414 | -2.6564 | H | -1.7669 | 1.1637  | -6.0538 |
| C | 1.4509  | -4.0574 | -2.0733 | H | -5.4756 | -5.4725 | 0.1258  |
| C | 2.1347  | 0.3686  | -0.1879 | H | -4.8383 | 0.5041  | -3.0571 |
| C | 1.8918  | -5.3971 | -1.9329 | H | -3.8931 | 9.3508  | -0.5866 |
| C | 2.2309  | -3.0381 | -1.4047 | H | -3.1044 | -6.0148 | 0.5237  |
| C | 2.9397  | -0.7585 | -0.8919 | H | -2.9160 | 4.4958  | 3.9739  |
| C | 3.0676  | 1.5401  | 0.1754  | H | -4.8617 | -6.4759 | -1.1891 |
| C | 4.0832  | -1.2624 | 0.0014  | H | -0.1880 | 2.0731  | 1.6289  |
| C | 4.2668  | 1.0674  | 1.0228  | H | -2.8552 | -0.2395 | -6.1531 |
| C | 5.0266  | -0.0939 | 0.3578  | H | -3.5996 | 3.7988  | -3.9278 |
| C | 3.1395  | -6.2709 | 3.3383  | H | -4.0712 | 7.4035  | -2.2943 |
| C | 1.7273  | -7.9136 | -2.4100 | H | -4.6432 | -0.6184 | -4.4254 |
| C | 2.8127  | -7.4955 | 2.4552  | H | -4.5148 | 6.5540  | 0.4970  |
| C | 3.1363  | -6.7356 | 4.8207  | H | -4.7765 | 8.0074  | 1.4472  |
| C | 4.5634  | -5.7722 | 2.9676  | H | -0.8473 | 2.3330  | 4.6712  |
| C | 1.5046  | -8.7945 | -3.6658 | H | -3.9639 | -3.7647 | 1.2292  |
| C | 0.8534  | -8.4778 | -1.2545 | H | -3.7921 | 2.7013  | -5.9087 |
| C | 3.2206  | -8.0426 | -2.0142 | H | -5.2751 | -2.2455 | -1.9454 |
| H | -2.9145 | -4.5689 | -3.8828 | H | -5.0737 | 2.3843  | -4.7130 |
| H | 0.8139  | -6.1113 | 1.7443  | H | -4.6022 | -4.4946 | -2.6476 |
| H | -0.0246 | -2.2849 | 6.0558  | H | -5.0380 | -0.5227 | -0.7912 |
| H | -2.2269 | -2.9276 | -3.9700 | H | -4.0147 | 4.4194  | 2.0447  |
| H | 0.6040  | -3.8660 | -6.3302 | H | -4.7919 | 1.2458  | -6.0419 |
| H | 2.9148  | -0.4204 | 3.4619  | H | -2.5994 | 2.0414  | 4.5797  |
| H | -0.0769 | -2.5173 | -5.3996 | H | -6.2544 | -4.5462 | -2.0383 |
| H | -0.4848 | -6.1692 | -6.2806 | H | -1.4875 | 1.0188  | 3.6545  |
| H | -1.9318 | -6.4602 | -5.2862 | H | -6.4201 | 8.8799  | -0.1079 |
| H | 0.2608  | -0.5309 | 6.1023  | H | -6.0925 | 7.6246  | -1.2959 |
| H | 1.9756  | 0.5432  | 4.6207  | H | -5.7541 | -2.8209 | -0.3427 |
| H | -3.0390 | -3.6337 | -5.3866 | H | -5.9420 | 1.4858  | -0.3680 |
| H | -1.1791 | -5.3934 | 1.0294  | H | -6.9924 | 6.7099  | 1.4554  |
| H | -1.5649 | -0.1883 | -4.9268 | H | -7.8030 | 5.8182  | -1.3744 |
| H | -2.6295 | -5.3446 | -1.0437 | H | -8.1969 | 7.4695  | 0.4199  |
| H | -0.4532 | 3.7920  | 1.2351  | H | -8.2881 | 5.0406  | 0.1515  |
| H | -2.5208 | 8.2213  | -2.2431 | H | -0.3367 | 4.3711  | -1.2502 |
| H | -2.0468 | 5.1979  | 2.5828  | H | 3.0755  | -3.8838 | 4.6095  |
| H | -2.7195 | 8.3685  | 0.2956  | H | -0.0961 | -2.3636 | -0.2063 |
| H | -3.4369 | -0.5975 | -3.1114 | H | 2.6772  | -0.9430 | 6.4517  |
| H | -0.9693 | -3.1780 | -6.7887 | H | -0.0388 | -6.8716 | -4.2517 |
| H | -0.6089 | -1.2583 | 4.7316  | H | 3.6542  | -1.9301 | 5.3547  |
| H | -1.1595 | 4.7070  | 4.0371  | H | 2.4436  | -2.6981 | 6.4104  |
| H | -2.0239 | -5.4010 | -6.7030 | H | 0.9796  | 2.7066  | -0.5685 |
| H | -2.8875 | -2.7961 | -1.4516 | H | 1.6958  | -0.0531 | 0.7282  |
| H | 0.4007  | 3.3449  | 2.7327  | H | 3.3683  | -0.3203 | -1.8060 |

|            |         |         |         |   |         |         |         |
|------------|---------|---------|---------|---|---------|---------|---------|
| H          | 2.5155  | 2.3041  | 0.7349  | N | 1.1706  | 1.3734  | -3.2005 |
| H          | 3.4235  | 2.0089  | -0.7536 | N | -2.0887 | -1.0460 | 0.2554  |
| H          | 2.7000  | -5.5818 | -1.2308 | N | -1.0577 | -3.2064 | 1.3656  |
| H          | 3.1367  | -3.4069 | -0.9182 | C | 2.0067  | -7.3776 | -2.2255 |
| H          | 3.6757  | -1.7148 | 0.9175  | C | -0.2595 | -7.9669 | -3.1158 |
| H          | 3.9038  | 0.7451  | 2.0068  | C | 1.7671  | -8.0665 | -4.6249 |
| H          | 4.6585  | -2.0392 | -0.5173 | C | 4.2458  | -6.2466 | 5.0745  |
| H          | 5.5120  | 0.2665  | -0.5613 | C | 2.2499  | -6.9480 | 6.4668  |
| H          | 4.9460  | 1.9122  | 1.1980  | C | 2.4811  | -7.7380 | 4.0977  |
| H          | 5.8275  | -0.4498 | 1.0193  | C | 1.0889  | -7.2823 | -3.4671 |
| H          | 1.8252  | -7.9083 | 2.6907  | C | 2.7207  | -6.5395 | 5.0438  |
| H          | 3.5541  | -8.2862 | 2.6226  | C | 5.1362  | 0.4683  | -1.6177 |
| H          | 2.8319  | -7.2373 | 1.3905  | C | 4.3947  | 1.6806  | -1.0234 |
| H          | 2.1443  | -7.1040 | 5.1059  | C | 4.1575  | -0.6711 | -1.9736 |
| H          | 3.4005  | -5.9191 | 5.5011  | C | 3.2699  | 2.1766  | -1.9553 |
| H          | 3.8632  | -7.5452 | 4.9694  | C | 3.0719  | -0.1544 | -2.9293 |
| H          | 4.5990  | -5.4547 | 1.9190  | C | 2.1613  | -2.3985 | -3.1990 |
| H          | 5.3031  | -6.5706 | 3.1129  | C | 1.5166  | -4.7413 | -3.3401 |
| H          | 4.8596  | -4.9179 | 3.5861  | C | 2.2964  | 1.0292  | -2.2899 |
| H          | -0.2099 | -8.4247 | -1.5151 | C | 1.2998  | -3.4103 | -3.7710 |
| H          | 1.0050  | -7.8961 | -0.3385 | C | 0.8514  | -5.8217 | -3.9021 |
| H          | 1.1067  | -9.5259 | -1.0450 | C | -0.0208 | -5.5346 | -4.9867 |
| H          | 0.4436  | -8.8839 | -3.9236 | C | 0.3524  | -3.1235 | -4.8155 |
| H          | 1.8811  | -9.8076 | -3.4767 | C | 0.6049  | 2.5382  | -3.1485 |
| H          | 2.0352  | -8.3889 | -4.5350 | C | -0.2716 | -4.2561 | -5.4748 |
| H          | 3.8697  | -7.6175 | -2.7883 | C | 2.6012  | -1.8355 | 7.0342  |
| H          | 3.4819  | -9.1008 | -1.8885 | C | 1.9538  | -5.2815 | 4.5888  |
| H          | 3.4419  | -7.5383 | -1.0681 | C | 2.0726  | -4.0756 | 5.3283  |
|            |         |         |         | C | -0.5577 | 2.9764  | -3.8820 |
|            |         |         |         | C | -6.7647 | 5.4169  | -0.4939 |
| <b>F2:</b> |         |         |         | C | -6.5333 | 6.8076  | 0.1403  |
| -6708.294  |         |         |         | C | -5.5733 | 4.4769  | -0.5637 |
| Cr         | 0.5056  | -0.2082 | -4.3268 | C | -5.7146 | 7.7893  | -0.7292 |
| Cr         | -0.8648 | -1.2442 | 1.8544  | C | -4.0709 | 3.3103  | 0.9851  |
| Cl         | 2.0181  | 0.4524  | -6.1204 | C | -3.8286 | 2.1723  | 0.2412  |
| Cl         | 1.0853  | -0.8033 | 0.8071  | C | -3.4123 | 3.5088  | 2.2111  |
| O          | -0.6247 | -0.7198 | -2.8615 | C | -2.2355 | 1.7657  | 5.1352  |
| O          | 0.0713  | -1.9126 | -5.2134 | C | -2.9065 | -3.6115 | -2.5593 |
| O          | -5.0281 | 4.3105  | 0.6899  | C | -2.7938 | 0.0001  | -0.0495 |
| O          | -5.2008 | 3.9058  | -1.5678 | C | -3.1012 | -2.3210 | -1.7393 |
| O          | -1.5261 | 0.4109  | 2.5364  | C | -4.3929 | 2.6954  | -7.1338 |
| O          | -2.7387 | 6.0515  | -3.9740 | C | -2.9428 | 1.1925  | 0.7519  |
| O          | -0.1369 | -1.7875 | 3.5514  | C | -4.1851 | 7.6714  | -0.5799 |
| O          | -1.3304 | 6.8283  | -2.3324 | C | -2.5255 | 2.5787  | 2.7497  |
| O          | -0.9178 | 0.9252  | -5.1000 | C | -2.2981 | 1.3621  | 2.0165  |
| N          | 2.0746  | -1.1284 | -3.4113 |   |         |         |         |



|   |         |         |         |   |         |         |         |
|---|---------|---------|---------|---|---------|---------|---------|
| C | -1.8169 | 2.8428  | 4.0959  | H | 2.8122  | -7.5200 | 3.0758  |
| C | -2.0143 | -2.2217 | -0.6606 | H | 3.0448  | -8.6084 | 4.4534  |
| C | -2.8567 | -4.8698 | -1.6759 | H | 1.4219  | -8.0191 | 4.0645  |
| C | -2.0173 | -3.4680 | 0.2507  | H | 5.8938  | 0.1035  | -0.9112 |
| C | -3.2148 | 1.8945  | -6.5265 | H | 5.1003  | 2.4990  | -0.8281 |
| C | -3.4053 | 8.6304  | -1.5076 | H | 5.6726  | 0.7799  | -2.5264 |
| C | -1.7879 | -4.7473 | -0.5684 | H | 4.7113  | -1.4955 | -2.4402 |
| C | -3.8087 | 0.6315  | -5.8420 | H | 3.9587  | 1.3969  | -0.0547 |
| C | -2.2784 | 1.4704  | -7.6932 | H | 3.6951  | -1.0609 | -1.0555 |
| C | -0.2756 | 2.8150  | 3.8957  | H | 2.9674  | -2.7853 | -2.5696 |
| C | -2.1866 | 4.2275  | 4.6800  | H | 2.2441  | -4.8925 | -2.5477 |
| C | -3.2808 | 8.1213  | -2.9572 | H | 3.6926  | 2.5675  | -2.8917 |
| C | -2.8140 | 4.0103  | -5.1539 | H | 2.7419  | 3.0040  | -1.4668 |
| C | -2.3249 | 6.9344  | -3.0325 | H | 3.5445  | 0.2261  | -3.8468 |
| C | -2.4251 | 2.7234  | -5.4914 | H | 1.8471  | 0.6582  | -1.3556 |
| C | -0.4276 | -4.1811 | 1.9497  | H | 1.0129  | 3.2936  | -2.4723 |
| C | -2.1220 | 4.7873  | -4.2036 | H | 2.2460  | -2.5998 | 7.7366  |
| C | 2.1924  | -0.4731 | 4.9803  | H | 3.5970  | -2.1241 | 6.6773  |
| C | 0.5559  | -2.8743 | 3.8601  | H | -0.5036 | -6.3718 | -5.4772 |
| C | 0.2540  | -1.1699 | 6.4767  | H | 2.7083  | -0.8976 | 7.5909  |
| C | -1.6698 | -5.3516 | -7.3309 | H | -0.5208 | -0.0526 | -2.1660 |
| C | 0.4357  | -4.0769 | 3.0950  | H | 2.7188  | -4.0863 | 6.1967  |
| C | -0.2960 | -3.3161 | -7.8208 | H | -0.4565 | 4.8809  | -2.8579 |
| C | -1.2656 | 2.1487  | -4.8276 | H | -7.5377 | 4.8926  | 0.0862  |
| C | -2.3830 | -3.1484 | -6.3849 | H | -7.5248 | 7.2429  | 0.3247  |
| C | 1.6122  | -1.6123 | 5.8643  | H | -7.1385 | 5.5245  | -1.5166 |
| C | 1.4168  | -2.8873 | 5.0143  | H | -6.0580 | 6.6858  | 1.1221  |
| C | -1.1471 | -4.0246 | -6.7269 | H | -4.2946 | 2.0195  | -0.7209 |
| C | 1.1270  | -5.2526 | 3.4798  | H | -4.1015 | -2.3047 | -1.2768 |
| C | -0.9974 | 4.2909  | -3.5820 | H | -6.0041 | 7.6585  | -1.7828 |
| H | 1.5865  | -6.8310 | -1.3730 | H | -6.0008 | 8.8176  | -0.4621 |
| H | 2.1240  | -8.4279 | -1.9302 | H | -1.9758 | 0.7660  | 4.7844  |
| H | 3.0053  | -6.9748 | -2.4306 | H | -3.7139 | -3.7004 | -3.2961 |
| H | 2.7303  | -7.6101 | -4.8807 | H | -3.3171 | 1.8070  | 5.3160  |
| H | 1.9442  | -9.1114 | -4.3353 | H | -4.9105 | 2.0671  | -7.8684 |
| H | 1.1446  | -8.0628 | -5.5260 | H | -3.6321 | 4.4280  | 2.7369  |
| H | -0.0991 | -9.0196 | -2.8461 | H | -3.3483 | 0.0026  | -0.9866 |
| H | -0.7396 | -7.4647 | -2.2676 | H | -1.9735 | -3.5235 | -3.1273 |
| H | -0.9560 | -7.9381 | -3.9599 | H | -5.1250 | 2.9912  | -6.3718 |
| H | 4.4877  | -5.4305 | 5.7639  | H | -2.9984 | -1.4702 | -2.4180 |
| H | 4.7972  | -7.1383 | 5.3999  | H | -4.0467 | 3.5986  | -7.6520 |
| H | 4.6057  | -5.9639 | 4.0787  | H | -3.0139 | -3.5282 | 0.7217  |
| H | 2.8010  | -7.8320 | 6.8126  | H | -1.7225 | 1.9469  | 6.0884  |
| H | 2.4148  | -6.1428 | 7.1906  | H | -3.9229 | 7.8886  | 0.4655  |
| H | 1.1799  | -7.1857 | 6.4650  | H | -3.8517 | 6.6422  | -0.7676 |

|            |         |         |         |    |         |         |         |
|------------|---------|---------|---------|----|---------|---------|---------|
| H          | -4.3455 | 0.0224  | -6.5815 | Cl | 6.7230  | -1.5603 | -1.3899 |
| H          | -4.2489 | 7.8358  | -3.3801 | Cl | -3.7152 | 2.7347  | -3.0222 |
| H          | -3.6861 | 4.4623  | -5.6082 | N  | 4.1309  | -0.7538 | -2.9745 |
| H          | -2.8364 | 0.8608  | -8.4167 | N  | 3.7408  | -2.1198 | -0.7195 |
| H          | 0.0569  | 1.8423  | 3.5313  | N  | -2.4344 | 3.8908  | -0.3470 |
| H          | -2.6360 | -5.7489 | -2.2936 | N  | -0.7772 | 3.1992  | -2.3589 |
| H          | -3.2608 | 4.3143  | 4.8849  | O  | 4.9957  | -0.1057 | 0.8132  |
| H          | -1.8367 | -5.6374 | 0.0711  | O  | 5.4422  | 1.3407  | -1.6538 |
| H          | -3.8906 | 9.6167  | -1.5062 | O  | 2.9018  | 0.6793  | -0.9588 |
| H          | -4.5192 | 0.9212  | -5.0564 | O  | -1.5485 | 0.4830  | -2.2656 |
| H          | -3.8414 | -5.0418 | -1.2124 | O  | -3.6115 | 1.3204  | -0.2335 |
| H          | -1.8934 | 2.3549  | -8.2160 | O  | -0.9164 | 1.7128  | 0.1577  |
| H          | 1.5436  | -0.2554 | 4.1312  | C  | 1.5530  | 0.2751  | -0.5286 |
| H          | 0.2260  | 3.0234  | 4.8497  | C  | 2.3105  | 1.2390  | 0.2645  |
| H          | -1.0538 | -2.1304 | -1.1904 | C  | 2.0395  | 2.7127  | 0.2253  |
| H          | -2.2694 | -5.1249 | -8.2209 | O  | 0.4280  | 0.1401  | -7.4424 |
| H          | -1.6567 | 4.3669  | 5.6294  | O  | 2.6975  | 0.1377  | -7.0950 |
| H          | -0.4749 | -0.9630 | 5.6922  | O  | 4.1864  | 4.4543  | -6.0883 |
| H          | -0.9038 | -3.1554 | -8.7215 | O  | 1.8888  | 4.3925  | -5.9926 |
| H          | -3.0170 | 0.0280  | -5.3963 | C  | 2.2041  | -4.6531 | -3.2658 |
| H          | -2.3903 | 8.7667  | -1.1180 | C  | 3.7386  | -2.7319 | 0.4248  |
| H          | -1.8924 | 5.0447  | 4.0105  | C  | 3.9276  | 0.1457  | -3.8830 |
| H          | -2.8766 | 8.9190  | -3.5974 | C  | 4.3507  | -2.2758 | 1.6493  |
| H          | 0.0328  | 3.5815  | 3.1743  | C  | 4.9732  | -0.9909 | 1.7926  |
| H          | -0.7879 | -4.7125 | -1.0207 | C  | 4.2896  | -3.1698 | 2.7505  |
| H          | -1.4315 | 0.8924  | -7.3203 | C  | 5.5556  | -0.6557 | 3.0698  |
| H          | -0.5532 | -5.1936 | 1.5633  | C  | 5.4586  | -1.5838 | 4.1029  |
| H          | -2.9584 | -2.9438 | -7.2978 | C  | 4.3116  | 1.5346  | -3.7805 |
| H          | 2.3056  | 0.4404  | 5.5784  | C  | 5.0875  | 2.0699  | -2.6933 |
| H          | 0.3925  | -0.2602 | 7.0757  | C  | 3.9699  | 2.3424  | -4.8890 |
| H          | -2.3113 | -5.8990 | -6.6282 | C  | 5.5331  | 3.4422  | -2.7797 |
| H          | -0.8502 | -6.0127 | -7.6391 | C  | 5.1519  | 4.2000  | -3.8879 |
| H          | 0.0706  | -2.3515 | -7.4658 | C  | 3.0524  | -2.6732 | -1.9176 |
| H          | 3.1801  | -0.7537 | 4.5950  | C  | 3.8342  | -2.1879 | -3.1717 |
| H          | 0.5664  | -3.9364 | -8.0963 | C  | 3.0931  | -2.5832 | -4.4557 |
| H          | -2.0726 | -2.1997 | -5.9467 | C  | 2.8776  | -4.2021 | -1.9520 |
| H          | -0.1459 | -1.9536 | 7.1329  | C  | 2.9342  | -4.1160 | -4.5112 |
| H          | 0.9882  | -6.1366 | 2.8666  | C  | -0.2137 | 2.8111  | -3.4573 |
| H          | -3.0400 | -3.6688 | -5.6766 | C  | -3.4023 | 4.1781  | 0.4574  |
|            |         |         |         | C  | -0.3102 | 1.4994  | -4.0583 |
|            |         |         |         | C  | -1.0249 | 0.3990  | -3.4620 |
| <b>F3:</b> |         |         |         | C  | 0.2361  | 1.3835  | -5.3566 |
| -6901.4151 |         |         |         | C  | -1.1365 | -0.8368 | -4.2146 |
| Cr         | 4.7437  | -0.3848 | -1.0931 | C  | -0.5875 | -0.8909 | -5.4951 |
| Cr         | -2.1322 | 2.1048  | -1.2718 | C  | -4.4890 | 3.3046  | 0.8353  |

|   |         |         |         |   |         |         |         |
|---|---------|---------|---------|---|---------|---------|---------|
| C | -4.5570 | 1.9202  | 0.4569  | C | 3.0110  | 5.3328  | -7.9396 |
| C | -5.4872 | 3.8733  | 1.6662  | H | 5.9486  | 6.1515  | -2.0220 |
| C | -5.7126 | 1.1631  | 0.8954  | H | 7.3748  | 5.6064  | -2.9405 |
| C | -6.6506 | 1.7886  | 1.7092  | H | 7.4885  | 5.8732  | -1.1929 |
| C | -0.8313 | 4.6516  | -2.0292 | H | 4.8625  | 4.6303  | -0.3191 |
| C | -1.2697 | 4.7807  | -0.5463 | H | 6.4424  | 4.3951  | 0.4604  |
| C | -1.4546 | 6.2582  | -0.1566 | H | 5.4836  | 2.9832  | -0.0382 |
| C | 0.4562  | 5.4544  | -2.3017 | H | 7.5736  | 2.1638  | -1.4053 |
| C | -0.1625 | 7.0544  | -0.4265 | H | 8.4395  | 3.6237  | -0.8641 |
| C | 0.2708  | 6.9317  | -1.8979 | H | 8.3016  | 3.2618  | -2.5991 |
| C | 6.4584  | 4.0329  | -1.6944 | H | 5.4730  | 5.2282  | -3.9883 |
| C | 7.7771  | 3.2108  | -1.6366 | H | 2.0588  | -2.2005 | -1.9604 |
| C | 5.7626  | 4.0023  | -0.3073 | H | 2.2642  | -4.5390 | -1.1073 |
| C | 6.8343  | 5.5050  | -1.9917 | H | 3.8650  | -4.6745 | -1.8482 |
| C | 6.2690  | 0.6992  | 3.2719  | H | 1.1647  | -4.2959 | -3.2772 |
| C | 5.2603  | 1.8655  | 3.0803  | H | 2.1615  | -5.7495 | -3.2942 |
| C | 7.4368  | 0.8440  | 2.2571  | H | 3.9284  | -4.5822 | -4.5834 |
| C | 6.8690  | 0.8340  | 4.6931  | H | 2.3848  | -4.3986 | -5.4180 |
| C | -5.9140 | -0.2881 | 0.4083  | H | 3.6387  | -2.2307 | -5.3381 |
| C | -4.7176 | -1.1896 | 0.8212  | H | 2.1047  | -2.1056 | -4.4799 |
| C | -6.0605 | -0.2750 | -1.1391 | H | 4.8150  | -2.6849 | -3.1521 |
| C | -7.1941 | -0.9329 | 0.9938  | H | 6.0974  | 0.8002  | 5.4722  |
| C | -1.9425 | -2.0190 | -3.6391 | H | 7.3803  | 1.8005  | 4.7723  |
| C | -3.4231 | -1.5843 | -3.4667 | H | 7.6062  | 0.0482  | 4.8972  |
| C | -1.3730 | -2.4561 | -2.2607 | H | 7.0767  | 0.7814  | 1.2298  |
| C | -1.9127 | -3.2542 | -4.5714 | H | 8.1783  | 0.0512  | 2.4136  |
| C | 4.3775  | 3.6588  | -4.9238 | H | 7.9347  | 1.8121  | 2.4011  |
| C | 4.8319  | -2.8525 | 3.9862  | H | 4.8537  | 1.8594  | 2.0684  |
| C | 0.0855  | 0.2060  | -6.0565 | H | 5.7638  | 2.8266  | 3.2475  |
| C | -6.5711 | 3.1433  | 2.1270  | H | 4.4328  | 1.7853  | 3.7971  |
| C | -7.6596 | 3.7215  | 3.0519  | H | 3.8001  | -4.1253 | 2.5918  |
| C | -9.0537 | 3.5903  | 2.3797  | H | 5.8894  | -1.3287 | 5.0626  |
| C | -7.4234 | 5.2161  | 3.3664  | H | -5.3735 | 4.9194  | 1.9345  |
| C | -7.6699 | 2.9400  | 4.3946  | H | -7.5025 | 1.2110  | 2.0473  |
| C | 4.7879  | -3.7940 | 5.2055  | H | -7.1519 | -1.0045 | 2.0883  |
| C | 4.0823  | -5.1311 | 4.8822  | H | -7.2929 | -1.9496 | 0.5944  |
| C | 4.0158  | -3.1101 | 6.3665  | H | -8.0971 | -0.3760 | 0.7158  |
| C | 6.2336  | -4.1155 | 5.6722  | H | -4.5864 | -1.1782 | 1.9114  |
| C | 1.7975  | 0.3298  | -9.3493 | H | -3.7958 | -0.8456 | 0.3529  |
| C | 1.7304  | 0.1958  | -7.8368 | H | -4.9118 | -2.2257 | 0.5117  |
| C | 2.9804  | 1.1805  | -9.8551 | H | -6.9854 | 0.2398  | -1.4282 |
| C | 3.0949  | 2.6014  | -9.2559 | H | -6.1057 | -1.3037 | -1.5209 |
| C | 1.7597  | 3.3654  | -9.1312 | H | -5.2220 | 0.2414  | -1.6085 |
| C | 1.8995  | 4.8917  | -8.9147 | H | -1.7187 | 6.3464  | 0.9043  |
| C | 2.9222  | 4.6772  | -6.5710 | H | -2.2854 | 6.6862  | -0.7362 |

|   |         |         |         |            |         |         |         |
|---|---------|---------|---------|------------|---------|---------|---------|
| H | 0.6398  | 6.6647  | 0.2179  | H          | -3.4305 | 5.1635  | 0.9288  |
| H | -0.3066 | 8.1078  | -0.1527 | H          | 0.7546  | 0.6102  | -1.1784 |
| H | -0.4971 | 7.3890  | -2.5397 | H          | 1.4948  | -0.7524 | -0.1781 |
| H | 1.2023  | 7.4860  | -2.0714 | H          | -1.5141 | 1.4563  | 0.8774  |
| H | -1.6495 | 5.0587  | -2.6424 | H          | 1.8824  | -0.6823 | -9.7703 |
| H | -0.4712 | 4.3423  | 0.0682  | H          | 0.8426  | 0.7343  | -9.6954 |
| H | 0.7333  | 5.3976  | -3.3598 |            |         |         |         |
| H | 1.2870  | 5.0167  | -1.7314 | <b>F4:</b> |         |         |         |
| H | -0.6959 | -1.7777 | -6.1068 | -6901.4262 |         |         |         |
| H | 0.7251  | 2.2423  | -5.8040 | Cr         | 4.5877  | -0.3066 | -1.0351 |
| H | -0.3121 | -2.7258 | -2.3508 | Cr         | -2.1003 | 2.0731  | -1.3462 |
| H | -1.9193 | -3.3363 | -1.8969 | Cl         | 6.5231  | -1.6406 | -1.1930 |
| H | -1.4685 | -1.6502 | -1.5332 | Cl         | -3.8625 | 2.7581  | -2.8447 |
| H | -3.8625 | -1.3226 | -4.4367 | N          | 4.0501  | -0.7431 | -2.9272 |
| H | -3.4923 | -0.7164 | -2.8113 | N          | 3.4563  | -1.9572 | -0.6250 |
| H | -4.0072 | -2.4065 | -3.0317 | N          | -2.3659 | 3.7727  | -0.2754 |
| H | -2.3839 | -3.0462 | -5.5398 | N          | -0.8980 | 3.2789  | -2.4930 |
| H | -2.4728 | -4.0702 | -4.0993 | O          | 4.7956  | 0.0419  | 0.8771  |
| H | -0.8896 | -3.6083 | -4.7536 | O          | 5.4574  | 1.3337  | -1.6596 |
| H | 2.9733  | 3.2765  | 0.3264  | O          | 2.8936  | 0.8109  | -1.0628 |
| H | 1.3600  | 2.9691  | 1.0433  | O          | -1.5854 | 0.5584  | -2.4942 |
| H | 1.5462  | 2.9771  | -0.7118 | O          | -3.4131 | 1.1453  | -0.2245 |
| H | 2.8138  | 0.8675  | 1.1528  | O          | -0.6892 | 1.6048  | -0.0693 |
| H | 3.4160  | 1.9029  | -5.7083 | C          | 1.1652  | 0.7483  | -0.6386 |
| H | 2.9845  | -2.8919 | 6.0665  | C          | 2.2418  | 1.5082  | -0.0088 |
| H | 4.4879  | -2.1661 | 6.6594  | C          | 2.2881  | 3.0142  | -0.1232 |
| H | 3.9902  | -3.7645 | 7.2477  | O          | 0.4025  | 0.3921  | -7.6722 |
| H | 6.7965  | -4.6071 | 4.8703  | O          | 2.6530  | 0.2125  | -7.2454 |
| H | 6.2132  | -4.7837 | 6.5430  | O          | 4.4939  | 4.3192  | -6.2485 |
| H | 6.7766  | -3.2077 | 5.9568  | O          | 2.1937  | 4.3974  | -6.1859 |
| H | 3.0400  | -4.9733 | 4.5802  | C          | 1.9604  | -4.5620 | -3.1271 |
| H | 4.0805  | -5.7714 | 5.7724  | C          | 3.3492  | -2.5005 | 0.5481  |
| H | 4.5962  | -5.6718 | 4.0786  | C          | 3.9429  | 0.1178  | -3.8864 |
| H | -9.0790 | 4.1498  | 1.4374  | C          | 3.9385  | -2.0263 | 1.7779  |
| H | -9.8374 | 3.9852  | 3.0405  | C          | 4.6691  | -0.7951 | 1.8849  |
| H | -9.2939 | 2.5453  | 2.1564  | C          | 3.7552  | -2.8525 | 2.9154  |
| H | -7.4336 | 5.8201  | 2.4517  | C          | 5.2414  | -0.4591 | 3.1677  |
| H | -6.4644 | 5.3754  | 3.8734  | C          | 5.0224  | -1.3209 | 4.2360  |
| H | -8.2189 | 5.5867  | 4.0247  | C          | 4.4103  | 1.4855  | -3.8336 |
| H | -6.7044 | 3.0387  | 4.9050  | C          | 5.2074  | 2.0125  | -2.7551 |
| H | -7.8543 | 1.8724  | 4.2319  | C          | 4.1352  | 2.2677  | -4.9760 |
| H | -8.4551 | 3.3249  | 5.0596  | C          | 5.7838  | 3.3312  | -2.9146 |
| H | 3.4591  | -0.1339 | -4.8258 | C          | 5.4643  | 4.0640  | -4.0548 |
| H | 3.2385  | -3.6994 | 0.5046  | C          | 2.8088  | -2.5408 | -1.8324 |
| H | 0.3571  | 3.5289  | -4.0503 | C          | 3.6920  | -2.1679 | -3.0592 |

|   |         |         |         |   |         |         |          |
|---|---------|---------|---------|---|---------|---------|----------|
| C | 3.0266  | -2.6084 | -4.3693 | C | 4.1037  | -3.3988 | 5.4142   |
| C | 2.5640  | -4.0612 | -1.7965 | C | 3.2839  | -4.6776 | 5.1272   |
| C | 2.7972  | -4.1331 | -4.3471 | C | 3.3640  | -2.5870 | 6.5141   |
| C | -0.3788 | 2.9622  | -3.6388 | C | 5.4961  | -3.8314 | 5.9504   |
| C | -3.2654 | 3.9605  | 0.6345  | C | 1.8405  | 0.4392  | -9.5348  |
| C | -0.4297 | 1.6683  | -4.2810 | C | 1.7235  | 0.3347  | -8.0226  |
| C | -1.1154 | 0.5354  | -3.7149 | C | 3.1046  | 1.1715  | -10.0318 |
| C | 0.1380  | 1.5948  | -5.5738 | C | 3.3294  | 2.5867  | -9.4469  |
| C | -1.2457 | -0.6644 | -4.5150 | C | 2.0583  | 3.4589  | -9.3669  |
| C | -0.6693 | -0.6793 | -5.7833 | C | 2.3083  | 4.9661  | -9.1134  |
| C | -4.2647 | 3.0081  | 1.0608  | C | 3.2529  | 4.6282  | -6.7404  |
| C | -4.3025 | 1.6457  | 0.6081  | C | 3.4159  | 5.3045  | -8.0932  |
| C | -5.2113 | 3.4792  | 2.0043  | H | 6.4972  | 6.0266  | -2.3084  |
| C | -5.3533 | 0.7966  | 1.1243  | H | 7.8408  | 5.2776  | -3.2045  |
| C | -6.2481 | 1.3311  | 2.0452  | H | 8.0073  | 5.6239  | -1.4765  |
| C | -1.0140 | 4.7105  | -2.0894 | H | 5.2736  | 4.7084  | -0.5068  |
| C | -1.2895 | 4.7495  | -0.5615 | H | 6.8349  | 4.3544  | 0.2648   |
| C | -1.5316 | 6.1918  | -0.0836 | H | 5.7284  | 3.0241  | -0.1496  |
| C | 0.1775  | 5.6165  | -2.4562 | H | 7.6917  | 1.9195  | -1.4955  |
| C | -0.3412 | 7.0976  | -0.4565 | H | 8.7165  | 3.2994  | -1.0313  |
| C | -0.0613 | 7.0597  | -1.9685 | H | 8.5197  | 2.8750  | -2.7463  |
| C | 6.7788  | 3.8800  | -1.8684 | H | 5.8744  | 5.0538  | -4.2080  |
| C | 8.0043  | 2.9262  | -1.7791 | H | 1.8447  | -2.0242 | -1.9594  |
| C | 6.1063  | 3.9942  | -0.4735 | H | 1.8808  | -4.3233 | -0.9793  |
| C | 7.3047  | 5.2861  | -2.2476 | H | 3.5186  | -4.5688 | -1.5987  |
| C | 6.0907  | 0.8220  | 3.3296  | H | 0.9409  | -4.1655 | -3.2321  |
| C | 5.2272  | 2.0786  | 3.0294  | H | 1.8703  | -5.6557 | -3.0956  |
| C | 7.3070  | 0.7712  | 2.3628  | H | 3.7711  | -4.6445 | -4.3197  |
| C | 6.6434  | 0.9780  | 4.7675  | H | 2.2995  | -4.4487 | -5.2730  |
| C | -5.4960 | -0.6568 | 0.6188  | H | 3.6578  | -2.3387 | -5.2243  |
| C | -4.2028 | -1.4696 | 0.9077  | H | 2.0681  | -2.0867 | -4.5039  |
| C | -5.7811 | -0.6349 | -0.9087 | H | 4.6435  | -2.7064 | -2.9385  |
| C | -6.6673 | -1.4057 | 1.3013  | H | 5.8391  | 1.0777  | 5.5075   |
| C | -2.1063 | -1.8466 | -4.0168 | H | 7.2544  | 1.8870  | 4.8161   |
| C | -3.5826 | -1.3704 | -3.9254 | H | 7.2807  | 0.1334  | 5.0561   |
| C | -1.6389 | -2.3524 | -2.6242 | H | 6.9838  | 0.6795  | 1.3251   |
| C | -2.0517 | -3.0541 | -4.9847 | H | 7.9486  | -0.0868 | 2.5986   |
| C | 4.6348  | 3.5460  | -5.0602 | H | 7.9056  | 1.6858  | 2.4696   |
| C | 4.2790  | -2.5270 | 4.1548  | H | 4.8550  | 2.0533  | 2.0049   |
| C | 0.0191  | 0.4308  | -6.2989 | H | 5.8287  | 2.9872  | 3.1640   |
| C | -6.2116 | 2.6692  | 2.5150  | H | 4.3731  | 2.1283  | 3.7167   |
| C | -7.2600 | 3.1490  | 3.5379  | H | 3.1871  | -3.7677 | 2.7804   |
| C | -8.6880 | 2.9723  | 2.9512  | H | 5.4485  | -1.0622 | 5.1970   |
| C | -7.0757 | 4.6395  | 3.9043  | H | -5.1305 | 4.5167  | 2.3132   |
| C | -7.1428 | 2.3141  | 4.8434  | H | -7.0310 | 0.6885  | 2.4297   |

|   |         |         |         |            |         |         |         |
|---|---------|---------|---------|------------|---------|---------|---------|
| H | -6.5225 | -1.4967 | 2.3854  | H          | -9.4441 | 3.2977  | 3.6781  |
| H | -6.7299 | -2.4190 | 0.8868  | H          | -8.8908 | 1.9262  | 2.6984  |
| H | -7.6306 | -0.9140 | 1.1190  | H          | -7.1751 | 5.2829  | 3.0225  |
| H | -3.9832 | -1.4730 | 1.9834  | H          | -6.0943 | 4.8255  | 4.3565  |
| H | -3.3518 | -1.0435 | 0.3768  | H          | -7.8412 | 4.9407  | 4.6297  |
| H | -4.3385 | -2.5102 | 0.5846  | H          | -6.1517 | 2.4408  | 5.2946  |
| H | -6.7620 | -0.1851 | -1.1073 | H          | -7.2883 | 1.2455  | 4.6515  |
| H | -5.7872 | -1.6588 | -1.3053 | H          | -7.8995 | 2.6328  | 5.5728  |
| H | -5.0256 | -0.0549 | -1.4390 | H          | 3.4937  | -0.1804 | -4.8348 |
| H | -1.6766 | 6.2176  | 1.0032  | H          | 2.7719  | -3.4221 | 0.6536  |
| H | -2.4529 | 6.5778  | -0.5442 | H          | 0.1275  | 3.7296  | -4.2277 |
| H | 0.5547  | 6.7580  | 0.0844  | H          | -3.3010 | 4.9192  | 1.1570  |
| H | -0.5381 | 8.1260  | -0.1266 | H          | 0.7743  | 1.0722  | -1.5847 |
| H | -0.9187 | 7.4899  | -2.5078 | H          | 0.9457  | -0.2544 | -0.2974 |
| H | 0.8102  | 7.6812  | -2.2109 | H          | -1.1546 | 1.1882  | 0.6750  |
| H | -1.9219 | 5.0790  | -2.5911 | H          | 1.8338  | -0.5842 | -9.9379 |
| H | -0.3949 | 4.3522  | -0.0621 | H          | 0.9344  | 0.9240  | -9.9083 |
| H | 0.3423  | 5.6240  | -3.5386 |            |         |         |         |
| H | 1.0924  | 5.2175  | -1.9974 |            |         |         |         |
| H | -0.7697 | -1.5452 | -6.4250 | <b>F5:</b> |         |         |         |
| H | 0.6358  | 2.4642  | -5.9907 | -6901.464  |         |         |         |
| H | -0.5835 | -2.6507 | -2.6589 | Cr         | 4.5712  | -0.2329 | -0.9598 |
| H | -2.2324 | -3.2295 | -2.3341 | Cr         | -2.1594 | 2.0559  | -1.5757 |
| H | -1.7581 | -1.5776 | -1.8685 | Cl         | 6.6487  | -1.4465 | -1.0954 |
| H | -3.9542 | -1.0771 | -4.9146 | Cl         | -3.9225 | 2.9428  | -2.8138 |
| H | -3.6719 | -0.5121 | -3.2580 | N          | 4.1628  | -0.7308 | -2.8901 |
| H | -4.2168 | -2.1815 | -3.5443 | N          | 3.5974  | -1.9911 | -0.5886 |
| H | -2.4498 | -2.8060 | -5.9760 | N          | -2.1315 | 3.6867  | -0.3572 |
| H | -2.6662 | -3.8652 | -4.5768 | N          | -0.8892 | 3.2000  | -2.6785 |
| H | -1.0296 | -3.4362 | -5.1058 | O          | 4.7440  | 0.0893  | 0.9730  |
| H | 3.3171  | 3.3622  | 0.0029  | O          | 5.3698  | 1.4609  | -1.5987 |
| H | 1.6591  | 3.4691  | 0.6504  | O          | 2.8503  | 0.6183  | -1.0575 |
| H | 1.9283  | 3.3294  | -1.1059 | O          | -1.8378 | 0.5537  | -2.7543 |
| H | 2.5504  | 1.1551  | 0.9791  | O          | -3.3503 | 1.1704  | -0.3136 |
| H | 3.5469  | 1.8409  | -5.7796 | O          | -0.6137 | 1.3146  | -0.3263 |
| H | 2.3686  | -2.2862 | 6.1675  | C          | 0.5772  | 0.6307  | -0.8156 |
| H | 3.9162  | -1.6791 | 6.7795  | C          | 1.9089  | 0.9487  | -0.1011 |
| H | 3.2458  | -3.1896 | 7.4246  | C          | 2.0184  | 2.4219  | 0.3120  |
| H | 6.0350  | -4.4144 | 5.1947  | O          | 0.4101  | 0.2463  | -7.8170 |
| H | 5.3865  | -4.4490 | 6.8517  | O          | 2.6516  | 0.1984  | -7.3185 |
| H | 6.1153  | -2.9658 | 6.2097  | O          | 4.2435  | 4.3594  | -6.2094 |
| H | 2.2734  | -4.4380 | 4.7755  | O          | 1.9426  | 4.3257  | -6.1934 |
| H | 3.1873  | -5.2694 | 6.0452  | C          | 2.1350  | -4.5730 | -3.1241 |
| H | 3.7715  | -5.3052 | 4.3721  | C          | 3.4748  | -2.5408 | 0.5767  |
| H | -8.8071 | 3.5664  | 2.0377  | C          | 4.0134  | 0.1182  | -3.8505 |
|   |         |         |         | C          | 4.0027  | -2.0434 | 1.8265  |

|   |         |         |         |   |         |         |          |
|---|---------|---------|---------|---|---------|---------|----------|
| C | 4.6485  | -0.7668 | 1.9631  | C | -3.6741 | -1.5046 | -4.0782  |
| C | 3.8435  | -2.8924 | 2.9507  | C | -1.6738 | -2.4026 | -2.7951  |
| C | 5.1807  | -0.4225 | 3.2651  | C | -2.1060 | -3.1483 | -5.1385  |
| C | 4.9901  | -1.3096 | 4.3188  | C | 4.4093  | 3.6051  | -5.0057  |
| C | 4.3574  | 1.5234  | -3.7894 | C | 4.3169  | -2.5543 | 4.2069   |
| C | 5.0648  | 2.1219  | -2.6829 | C | -0.0115 | 0.3088  | -6.4601  |
| C | 4.0433  | 2.2795  | -4.9400 | C | -5.9451 | 2.8115  | 2.5538   |
| C | 5.4862  | 3.5055  | -2.8159 | C | -6.9204 | 3.3439  | 3.6228   |
| C | 5.1351  | 4.2071  | -3.9663 | C | -8.3717 | 3.3154  | 3.0690   |
| C | 2.9723  | -2.5656 | -1.8061 | C | -6.5960 | 4.7990  | 4.0340   |
| C | 3.8629  | -2.1674 | -3.0216 | C | -6.8425 | 2.4565  | 4.8959   |
| C | 3.2265  | -2.6237 | -4.3432 | C | 4.1619  | -3.4531 | 5.4495   |
| C | 2.7354  | -4.0873 | -1.7884 | C | 3.4247  | -4.7732 | 5.1244   |
| C | 2.9948  | -4.1473 | -4.3281 | C | 3.3471  | -2.7046 | 6.5409   |
| C | -0.3497 | 2.8507  | -3.8065 | C | 5.5615  | -3.8145 | 6.0177   |
| C | -2.9690 | 3.9201  | 0.6034  | C | 1.9067  | 0.3736  | -9.6340  |
| C | -0.4839 | 1.5715  | -4.4642 | C | 1.7475  | 0.2641  | -8.1270  |
| C | -1.2467 | 0.4784  | -3.9299 | C | 3.1351  | 1.1921  | -10.0864 |
| C | 0.1270  | 1.4700  | -5.7355 | C | 3.2584  | 2.6139  | -9.4844  |
| C | -1.3493 | -0.7383 | -4.7007 | C | 1.9357  | 3.4042  | -9.4060  |
| C | -0.7303 | -0.7819 | -5.9488 | C | 2.0933  | 4.9179  | -9.1169  |
| C | -4.0274 | 3.0442  | 1.0458  | C | 3.0052  | 4.6066  | -6.7223  |
| C | -4.1862 | 1.7062  | 0.5618  | C | 3.1571  | 5.3020  | -8.0674  |
| C | -4.9022 | 3.5591  | 2.0343  | H | 5.8288  | 6.2604  | -2.1674  |
| C | -5.2762 | 0.9213  | 1.0837  | H | 7.3076  | 5.6872  | -2.9786  |
| C | -6.1006 | 1.4954  | 2.0477  | H | 7.3234  | 6.0386  | -1.2426  |
| C | -0.8260 | 4.6124  | -2.2090 | H | 4.6435  | 4.7601  | -0.4603  |
| C | -1.0001 | 4.5938  | -0.6682 | H | 6.1868  | 4.6468  | 0.4152   |
| C | -1.0848 | 6.0225  | -0.1058 | H | 5.3201  | 3.1649  | -0.0547  |
| C | 0.4386  | 5.4020  | -2.5997 | H | 7.4637  | 2.3251  | -1.2844  |
| C | 0.1689  | 6.8292  | -0.5029 | H | 8.2777  | 3.8175  | -0.7484  |
| C | 0.3790  | 6.8339  | -2.0270 | H | 8.2484  | 3.3899  | -2.4742  |
| C | 6.3431  | 4.1622  | -1.7114 | H | 5.4387  | 5.2376  | -4.0983  |
| C | 7.6685  | 3.3655  | -1.5427 | H | 2.0084  | -2.0498 | -1.9350  |
| C | 5.5703  | 4.1795  | -0.3646 | H | 2.0559  | -4.3630 | -0.9725  |
| C | 6.7165  | 5.6245  | -2.0566 | H | 3.6920  | -4.5944 | -1.5985  |
| C | 5.9676  | 0.8938  | 3.4567  | H | 1.1232  | -4.1562 | -3.2378  |
| C | 5.0496  | 2.1119  | 3.1650  | H | 2.0244  | -5.6653 | -3.1020  |
| C | 7.1933  | 0.9126  | 2.5004  | H | 3.9662  | -4.6616 | -4.2811  |
| C | 6.5008  | 1.0542  | 4.9016  | H | 2.5150  | -4.4611 | -5.2645  |
| C | -5.5433 | -0.5009 | 0.5404  | H | 3.8740  | -2.3539 | -5.1862  |
| C | -4.3115 | -1.4193 | 0.7759  | H | 2.2691  | -2.1044 | -4.4989  |
| C | -5.8586 | -0.4134 | -0.9791 | H | 4.8302  | -2.6730 | -2.8857  |
| C | -6.7538 | -1.1749 | 1.2309  | H | 5.6873  | 1.1060  | 5.6366   |
| C | -2.1839 | -1.9309 | -4.1853 | H | 7.0696  | 1.9895  | 4.9675   |

|   |         |         |         |            |         |         |          |
|---|---------|---------|---------|------------|---------|---------|----------|
| H | 7.1735  | 0.2349  | 5.1831  | H          | 3.5347  | 1.7967  | -5.7668  |
| H | 6.8827  | 0.8143  | 1.4595  | H          | 2.3435  | -2.4623 | 6.1725   |
| H | 7.8723  | 0.0832  | 2.7334  | H          | 3.8340  | -1.7668 | 6.8284   |
| H | 7.7475  | 1.8537  | 2.6200  | H          | 3.2450  | -3.3245 | 7.4421   |
| H | 4.6634  | 2.0590  | 2.1475  | H          | 6.1520  | -4.3557 | 5.2695   |
| H | 5.6140  | 3.0466  | 3.2827  | H          | 5.4642  | -4.4493 | 6.9088   |
| H | 4.2045  | 2.1310  | 3.8655  | H          | 6.1234  | -2.9187 | 6.3031   |
| H | 3.3359  | -3.8388 | 2.7905  | H          | 2.4125  | -4.5866 | 4.7459   |
| H | 5.3844  | -1.0407 | 5.2910  | H          | 3.3354  | -5.3822 | 6.0324   |
| H | -4.7304 | 4.5751  | 2.3735  | H          | 3.9680  | -5.3615 | 4.3759   |
| H | -6.9204 | 0.9036  | 2.4346  | H          | -8.4552 | 3.9456  | 2.1763   |
| H | -6.5953 | -1.3015 | 2.3093  | H          | -9.0762 | 3.6880  | 3.8239   |
| H | -6.8998 | -2.1707 | 0.7967  | H          | -8.6770 | 2.3002  | 2.7943   |
| H | -7.6803 | -0.6083 | 1.0790  | H          | -6.6776 | 5.4836  | 3.1818   |
| H | -4.0749 | -1.4803 | 1.8460  | H          | -5.5865 | 4.8861  | 4.4530   |
| H | -3.4388 | -1.0409 | 0.2431  | H          | -7.3055 | 5.1321  | 4.8008   |
| H | -4.5287 | -2.4338 | 0.4169  | H          | -5.8325 | 2.4798  | 5.3216   |
| H | -6.7966 | 0.1309  | -1.1439 | H          | -7.0899 | 1.4121  | 4.6764   |
| H | -5.9712 | -1.4222 | -1.3969 | H          | -7.5464 | 2.8171  | 5.6574   |
| H | -5.0644 | 0.1039  | -1.5191 | H          | 3.6131  | -0.2117 | -4.8107  |
| H | -1.1674 | 6.0016  | 0.9880  | H          | 2.9348  | -3.4873 | 0.6648   |
| H | -1.9890 | 6.5148  | -0.4929 | H          | 0.2572  | 3.5710  | -4.3544  |
| H | 1.0497  | 6.3877  | -0.0151 | H          | -2.8925 | 4.8569  | 1.1588   |
| H | 0.0812  | 7.8565  | -0.1269 | H          | 0.6919  | 0.9829  | -1.8379  |
| H | -0.4470 | 7.3817  | -2.5055 | H          | 0.3896  | -0.4475 | -0.8418  |
| H | 1.3022  | 7.3695  | -2.2802 | H          | -1.0366 | 0.8507  | 0.4145   |
| H | -1.7122 | 5.1057  | -2.6362 | H          | 1.9879  | -0.6470 | -10.0353 |
| H | -0.1082 | 4.1068  | -0.2521 | H          | 0.9829  | 0.7946  | -10.0400 |
| H | 0.5481  | 5.4553  | -3.6877 |            |         |         |          |
| H | 1.3264  | 4.8806  | -2.2163 | <b>R1:</b> |         |         |          |
| H | -0.8120 | -1.6614 | -6.5738 | -6626.631  |         |         |          |
| H | 0.6755  | 2.3178  | -6.1301 | Cr         | 1.9850  | 0.7081  | -2.6627  |
| H | -0.6137 | -2.6800 | -2.8500 | Cr         | -1.6762 | -1.5194 | 1.9195   |
| H | -2.2426 | -3.2844 | -2.4738 | Cl         | 3.3361  | 2.3054  | -3.8502  |
| H | -1.7926 | -1.6165 | -2.0492 | Cl         | -2.5266 | -2.4081 | 3.8905   |
| H | -4.0702 | -1.2401 | -5.0662 | O          | -1.1335 | -0.5528 | 0.1205   |
| H | -3.7846 | -0.6437 | -3.4180 | O          | 3.7808  | -7.6526 | -1.2276  |
| H | -4.2731 | -2.3336 | -3.6788 | O          | 4.3039  | -5.6642 | -2.0651  |
| H | -2.5103 | -2.9198 | -6.1320 | O          | 2.5346  | -0.7288 | -3.8586  |
| H | -2.7029 | -3.9668 | -4.7197 | O          | 1.0365  | -0.5487 | -1.5558  |
| H | -1.0768 | -3.5105 | -5.2554 | O          | 0.3515  | 1.2424  | -3.5701  |
| H | 3.0156  | 2.5995  | 0.7210  | O          | -3.5612 | -7.5929 | -2.0304  |
| H | 1.2729  | 2.7005  | 1.0692  | O          | -1.9920 | -8.0901 | -0.4214  |
| H | 1.9002  | 3.0648  | -0.5687 | O          | -0.6422 | -3.0598 | 1.4537   |
| H | 1.9964  | 0.3346  | 0.8159  | O          | -0.2385 | -0.6377 | 2.8318   |



|   |         |         |         |   |         |         |         |
|---|---------|---------|---------|---|---------|---------|---------|
| N | 3.5463  | 0.2881  | -1.4235 | C | -5.1345 | 1.0482  | 1.4467  |
| N | 1.6700  | 2.1924  | -1.2871 | C | -4.4807 | -1.3871 | 1.1027  |
| N | -3.2941 | -2.2659 | 0.9604  | C | -3.9743 | 0.0809  | 1.1702  |
| N | -2.8390 | 0.1275  | 2.1158  | C | -3.3849 | -3.4780 | 0.5029  |
| C | 0.2976  | -2.8432 | -1.7156 | C | -2.1969 | 2.2605  | -6.9569 |
| C | -0.7796 | 0.8583  | 0.1747  | C | -2.5491 | 1.1670  | 2.8348  |
| C | -1.3524 | -0.9686 | -1.2716 | C | -1.6758 | 4.0071  | -4.7417 |
| C | -0.0288 | -1.3646 | -1.9817 | C | -2.6972 | -5.7453 | -0.0084 |
| C | 4.7944  | 2.2079  | 1.7168  | C | -2.3410 | -4.4711 | 0.5045  |
| C | 4.6565  | 1.0081  | 0.7593  | C | -1.9530 | 0.4471  | -5.2592 |
| C | 3.9031  | -4.3956 | -2.5496 | C | -1.4730 | 4.9731  | -3.7319 |
| C | 3.3708  | -6.6321 | -1.7482 | C | -2.7878 | -8.3701 | -1.5045 |
| C | 4.1133  | -3.2930 | -1.7505 | C | -1.2789 | 1.7189  | -5.8388 |
| C | 3.3711  | -4.2502 | -3.8431 | C | -1.3637 | 1.3299  | 3.6424  |
| C | 3.8293  | 1.3820  | -0.4776 | C | -1.2794 | 2.5044  | 4.4328  |
| C | 4.0093  | -0.9092 | -1.3003 | C | -1.0596 | 2.7577  | -4.7235 |
| C | 3.7142  | -2.0130 | -2.1907 | C | -2.5192 | -9.7858 | -1.9661 |
| C | 3.4167  | 2.7642  | 2.1269  | C | -1.7703 | -6.7642 | 0.0199  |
| C | 2.9564  | -1.8727 | -6.5735 | C | -0.6143 | 4.6832  | -2.6872 |
| C | 2.9134  | -3.0229 | -4.3104 | C | -1.0266 | -4.2402 | 1.0365  |
| C | 3.0377  | -1.8648 | -3.4542 | C | -0.2769 | 0.3873  | 3.6524  |
| C | 2.9616  | -0.1113 | 5.7728  | C | -0.1836 | 2.7374  | 5.2415  |
| C | 1.9010  | -6.4051 | -2.0775 | C | -0.1796 | 2.4402  | -3.6266 |
| C | 2.5868  | 3.1523  | 0.8897  | C | 0.0544  | 3.4379  | -2.6144 |
| C | 2.1641  | -4.2399 | -6.4240 | C | -0.4910 | -6.5607 | 0.5760  |
| C | 2.2110  | -2.8916 | -5.6727 | C | -0.0906 | -5.3362 | 1.0935  |
| C | 2.4396  | 1.9543  | -0.0549 | C | 0.0746  | 1.3319  | -6.4966 |
| C | 1.1847  | -7.7505 | -2.2992 | H | 1.1516  | -3.1566 | -2.3191 |
| C | 2.1444  | -4.0816 | 1.0899  | H | 0.5476  | -2.9601 | -0.6620 |
| C | 2.0850  | -6.4820 | 1.7861  | H | -0.5605 | -3.4907 | -1.9518 |
| C | 1.8750  | -0.5172 | 4.7527  | H | -0.2428 | 1.0236  | 1.1060  |
| C | 2.6087  | -0.8734 | 3.4340  | H | -1.6971 | 1.4633  | 0.1440  |
| C | 1.1525  | -1.7750 | 5.3075  | H | -0.1424 | 1.0591  | -0.6758 |
| C | 1.2763  | -5.1648 | 1.7819  | H | -1.8264 | -0.1211 | -1.7851 |
| C | 0.7448  | -2.4185 | -5.4699 | H | -2.0503 | -1.8079 | -1.2267 |
| C | -0.1313 | -7.5996 | -3.0791 | H | 5.6489  | 0.6562  | 0.4486  |
| C | 0.9182  | 3.2275  | -1.4745 | H | 5.3690  | 3.0029  | 1.2178  |
| C | 0.8427  | 1.7680  | 5.3089  | H | 5.3602  | 1.9044  | 2.6074  |
| C | 0.8239  | 0.5941  | 4.5590  | H | 4.5604  | -3.4142 | -0.7690 |
| C | -1.0645 | -9.9638 | -2.4693 | H | 4.6751  | -1.1537 | -0.4693 |
| C | 1.0490  | -4.7480 | 3.2590  | H | 4.3403  | 2.1618  | -1.0586 |
| C | -0.6693 | -8.9608 | -3.5788 | H | 3.9647  | -2.2396 | -6.8076 |
| C | -6.2177 | 0.8990  | 0.3606  | H | 4.1609  | 0.1781  | 1.2794  |
| C | -6.7161 | -0.5545 | 0.2685  | H | 3.2890  | -5.1389 | -4.4555 |
| C | -5.5476 | -1.5247 | 0.0027  | H | 3.6724  | -0.9401 | 5.8755  |

|   |         |          |         |            |         |          |         |
|---|---------|----------|---------|------------|---------|----------|---------|
| H | 3.1738  | -4.6296  | -6.6070 | H          | -5.9306 | -2.5504  | -0.0424 |
| H | 3.5400  | 3.6356   | 2.7837  | H          | -5.5535 | 0.8286   | 2.4390  |
| H | 3.0715  | 3.9772   | 0.3470  | H          | -7.2009 | -0.8316  | 1.2166  |
| H | 2.5300  | 0.0954   | 6.7602  | H          | -4.9231 | -1.6242  | 2.0817  |
| H | 3.5132  | 0.7762   | 5.4349  | H          | -4.7716 | 2.0826   | 1.4581  |
| H | 3.0335  | -0.9046  | -6.0741 | H          | -5.0835 | -1.3003  | -0.9687 |
| H | 2.8639  | 2.0065   | 2.6986  | H          | -4.3370 | -3.8228  | 0.0939  |
| H | 3.1277  | -4.0576  | 1.5796  | H          | -3.1982 | 2.5038   | -6.5758 |
| H | 2.4027  | -1.7485  | -7.5148 | H          | -3.5503 | 0.3105   | 0.1803  |
| H | 1.0145  | -8.2365  | -1.3319 | H          | -2.9331 | 0.7009   | -4.8312 |
| H | 1.8525  | -8.4185  | -2.8607 | H          | -3.2331 | 2.0193   | 2.8475  |
| H | 3.0354  | -6.3035  | 2.3029  | H          | -2.3338 | 4.2629   | -5.5643 |
| H | 2.3183  | -6.8388  | 0.7768  | H          | -3.6860 | -5.9016  | -0.4144 |
| H | 1.4362  | -5.8456  | -1.2540 | H          | -2.3017 | 1.4888   | -7.7295 |
| H | 2.2974  | -4.3055  | 0.0300  | H          | -1.9761 | 5.9336   | -3.7882 |
| H | 1.7899  | -5.7734  | -2.9589 | H          | -1.7701 | 3.1594   | -7.4211 |
| H | 3.3052  | -1.7007  | 3.6271  | H          | -2.1010 | -0.2867  | -6.0640 |
| H | 1.5942  | -4.9926  | -5.8619 | H          | -2.0999 | 3.2180   | 4.3914  |
| H | 1.8648  | -2.6073  | 5.3794  | H          | -3.2270 | -10.0049 | -2.7715 |
| H | 1.6706  | -4.0903  | -7.3920 | H          | -1.3238 | 0.0040   | -4.4850 |
| H | 1.9211  | 1.1368   | 0.4672  | H          | -0.4296 | 5.4163   | -1.9042 |
| H | 1.5974  | 3.5011   | 1.2131  | H          | -2.7030 | -10.4777 | -1.1339 |
| H | 3.1915  | -0.0123  | 3.0891  | H          | -1.5363 | -8.7943  | -4.2346 |
| H | 0.7542  | -1.5659  | 6.3089  | H          | 0.4822  | -5.5224  | 3.7913  |
| H | 1.6837  | -3.0959  | 1.1737  | H          | 0.5033  | -3.8062  | 3.3177  |
| H | 1.5483  | -7.2747  | 2.3239  | H          | -0.1168 | 3.6402   | 5.8400  |
| H | 1.6684  | 1.9483   | 5.9872  | H          | -0.1080 | 0.5769   | -7.2748 |
| H | -0.3774 | -9.8701  | -1.6211 | H          | -0.2289 | -1.2362  | -3.0586 |
| H | 2.0242  | -4.6265  | 3.7497  |            |         |          |         |
| H | 0.8885  | 4.0215   | -0.7235 | <b>R2:</b> |         |          |         |
| H | 0.7717  | 0.9269   | -5.7613 | -6626.609  |         |          |         |
| H | 0.1181  | -9.4156  | -4.1972 | Cr         | 0.7141  | -1.5893  | -2.5372 |
| H | 0.7203  | -1.4170  | -5.0400 | Cr         | -2.4954 | -1.4903  | 2.6330  |
| H | -0.9698 | -10.9900 | -2.8492 | Cl         | 2.2300  | -0.0159  | -3.7176 |
| H | 0.1789  | -7.4094  | 0.5914  | Cl         | -4.3600 | -2.3707  | 3.7249  |
| H | 1.9102  | -1.1719  | 2.6520  | O          | -0.3276 | -2.8816  | -1.5453 |
| H | 0.2101  | -3.1083  | -4.8035 | O          | 0.4986  | -2.7305  | -4.1327 |
| H | 0.2325  | -2.4007  | -6.4421 | O          | -6.2149 | 4.0056   | 0.3354  |
| H | 0.0548  | -6.9665  | -3.9596 | O          | -5.6749 | 3.7027   | -1.8932 |
| H | 0.3246  | -2.0756  | 4.6633  | O          | -2.8723 | 0.3651   | 2.8739  |
| H | -0.8723 | -7.0641  | -2.4748 | O          | -1.6950 | 4.8418   | -1.1393 |
| H | 0.5340  | 2.2132   | -6.9619 | O          | -1.0056 | -1.4956  | 3.8359  |
| H | -5.7904 | 1.1940   | -0.6091 | O          | -0.6700 | 5.1778   | 0.9094  |
| H | -7.0527 | 1.5784   | 0.5700  | O          | 1.7050  | 2.3739   | 2.1648  |
| H | -7.4698 | -0.6498  | -0.5236 | O          | -0.8112 | -0.3801  | -2.8273 |

|   |         |         |         |   |         |         |         |
|---|---------|---------|---------|---|---------|---------|---------|
| N | 2.4137  | -2.6143 | -2.0648 | C | -2.4100 | 7.7429  | 0.7335  |
| N | 1.0852  | -0.6223 | -0.7945 | C | -2.3390 | -5.0191 | 0.1188  |
| N | -3.2864 | -1.3754 | 0.7738  | C | -3.5418 | -0.0185 | -3.9741 |
| N | -1.8720 | -3.2924 | 1.9673  | C | -1.6713 | 0.8948  | -5.4273 |
| C | 4.7721  | -2.0647 | 0.9904  | C | -1.9799 | 2.9662  | 4.1641  |
| C | 3.7017  | -1.5185 | 1.9507  | C | -4.0844 | 4.1808  | 4.7721  |
| C | 4.1356  | -2.8400 | -0.1803 | C | -1.5580 | 7.0657  | -0.3625 |
| C | 2.6800  | -0.6382 | 1.2052  | C | -2.1203 | 2.9994  | -2.5490 |
| C | 3.1217  | -1.9609 | -0.9336 | C | -1.2569 | 5.6039  | -0.0992 |
| C | 2.8743  | -3.6569 | -2.6856 | C | -1.9422 | 1.7164  | -3.0471 |
| C | 2.9696  | -5.4619 | -4.3194 | C | -0.8618 | -3.9886 | 2.3987  |
| C | 2.0408  | -1.4006 | 0.0332  | C | -1.4418 | 3.4557  | -1.4064 |
| C | 2.3100  | -4.2993 | -3.8520 | C | 0.9840  | 0.4317  | 5.0332  |
| C | 2.5263  | -6.1310 | -5.4442 | C | -0.0673 | -2.3877 | 4.1752  |
| C | 1.4075  | -5.6288 | -6.1413 | C | -0.6119 | -0.6401 | 6.7002  |
| C | 1.1587  | -3.7984 | -4.5524 | C | -0.8079 | -4.8310 | -7.7781 |
| C | 0.6032  | 0.5333  | -0.4373 | C | 0.0351  | -3.6282 | 3.4708  |
| C | 3.0188  | 4.1885  | 0.9452  | C | -0.1671 | -2.5173 | -7.0636 |
| C | 0.7152  | -4.4877 | -5.7422 | C | -1.0077 | 0.8449  | -2.3710 |
| C | 1.8582  | -0.6611 | 7.1074  | C | -1.7616 | -3.9104 | -5.6593 |
| C | 1.9442  | -4.2697 | 4.8256  | C | 0.7740  | -0.7606 | 6.0071  |
| C | 1.8355  | -3.0480 | 5.5194  | C | 1.4400  | 3.6279  | 2.9475  |
| C | -0.3415 | 1.3278  | -1.1935 | C | 0.8589  | -2.0919 | 5.2310  |
| C | 2.7281  | 3.4668  | 2.2333  | C | -0.4870 | -3.9480 | -6.5478 |
| C | -6.7714 | 5.7664  | -1.1561 | C | 1.0503  | -4.5533 | 3.8094  |
| C | -6.1472 | 6.7952  | -0.1851 | C | -0.5799 | 2.6381  | -0.7059 |
| C | -6.1607 | 4.3908  | -0.9939 | H | 5.4761  | -2.7143 | 1.5273  |
| C | -4.6353 | 7.0474  | -0.4214 | H | 4.1731  | -0.9356 | 2.7528  |
| C | -5.4075 | 2.9809  | 0.9121  | H | 5.3573  | -1.2252 | 0.5855  |
| C | -5.1048 | 1.7835  | 0.3030  | H | 4.9262  | -3.1801 | -0.8609 |
| C | -4.9265 | 3.2911  | 2.1943  | H | 3.1832  | -2.3570 | 2.4368  |
| C | -3.8857 | 1.7532  | 5.3443  | H | 3.6258  | -3.7379 | 0.2002  |
| C | -3.6157 | -4.1731 | -1.9170 | H | 3.7955  | -4.1215 | -2.3251 |
| C | -3.9601 | -0.3618 | 0.3047  | H | 3.8407  | -5.8200 | -3.7741 |
| C | -4.0260 | -2.8992 | -1.1490 | H | 3.1796  | 0.2634  | 0.8237  |
| C | -3.6533 | 2.3223  | -4.8566 | H | 1.9096  | -0.2925 | 1.9017  |
| C | -4.2710 | 0.8674  | 0.9905  | H | 3.6367  | -1.0969 | -1.3786 |
| C | -3.8405 | 7.1870  | 0.8954  | H | 1.4736  | -2.2597 | 0.4184  |
| C | -4.0904 | 2.4327  | 2.9008  | H | 3.0328  | -7.0233 | -5.7983 |
| C | -3.7329 | 1.1909  | 2.2738  | H | 3.6009  | 5.0981  | 1.1424  |
| C | -3.5224 | 2.8247  | 4.2799  | H | 0.9298  | 0.9889  | 0.4990  |
| C | -2.9746 | -2.5684 | -0.0755 | H | 2.0892  | 4.4742  | 0.4456  |
| C | -3.3784 | -5.3620 | -0.9695 | H | 3.5969  | 3.5563  | 0.2619  |
| C | -2.7829 | -3.7635 | 0.8845  | H | 1.7619  | -1.4606 | 7.8523  |
| C | -2.6929 | 1.2394  | -4.3085 | H | 2.8719  | -0.6927 | 6.6895  |

|   |         |         |         |            |         |         |         |
|---|---------|---------|---------|------------|---------|---------|---------|
| H | 1.0825  | -6.1585 | -7.0289 | H          | -3.6675 | 4.3974  | 5.7621  |
| H | 1.7448  | 0.2950  | 7.6313  | H          | -1.4205 | -0.7057 | 5.9714  |
| H | 2.7229  | -4.9764 | 5.0927  | H          | -1.0235 | -2.1224 | -7.6269 |
| H | -0.4583 | -3.6514 | -2.1357 | H          | -2.9015 | -0.8076 | -3.5751 |
| H | 2.5474  | -2.8507 | 6.3112  | H          | -1.8799 | 7.6576  | 1.6909  |
| H | -0.0760 | 2.9690  | 0.1907  | H          | -3.8053 | 5.0072  | 4.1073  |
| H | 0.6685  | 4.2537  | 2.5139  | H          | -0.5891 | 7.5817  | -0.4148 |
| H | -7.8503 | 5.6918  | -0.9650 | H          | -1.7223 | 3.7319  | 3.4226  |
| H | -6.7050 | 7.7378  | -0.2596 | H          | -1.3629 | -4.8201 | -0.3407 |
| H | -6.6326 | 6.0588  | -2.2012 | H          | -0.9734 | 0.1238  | -5.0986 |
| H | -6.2995 | 6.4191  | 0.8327  | H          | -0.6503 | -4.9466 | 1.9237  |
| H | -5.4659 | 1.5525  | -0.6892 | H          | -2.6156 | -3.5474 | -6.2464 |
| H | -5.0109 | -3.0363 | -0.6746 | H          | 1.3942  | 3.4726  | 4.0212  |
| H | -4.2079 | 6.2181  | -1.0002 | H          | 0.9502  | 1.3751  | 5.5943  |
| H | -4.5012 | 7.9492  | -1.0369 | H          | -0.6843 | 0.3237  | 7.2204  |
| H | -3.4963 | 0.7735  | 5.0678  | H          | -1.0730 | -5.8562 | -7.4897 |
| H | -4.3877 | -4.4253 | -2.6549 | H          | 0.0311  | -4.8755 | -8.4836 |
| H | -4.9744 | 1.6762  | 5.4572  | H          | 0.0506  | -1.8449 | -6.2328 |
| H | -4.1772 | 1.9202  | -5.7324 | H          | 1.9591  | 0.3653  | 4.5359  |
| H | -5.2229 | 4.2430  | 2.6129  | H          | 0.7030  | -2.5375 | -7.7319 |
| H | -4.3336 | -0.4178 | -0.7170 | H          | -1.6134 | -3.2452 | -4.8076 |
| H | -2.6957 | -3.9570 | -2.4732 | H          | -0.7402 | -1.4387 | 7.4420  |
| H | -4.4058 | 2.6229  | -4.1182 | H          | 3.5964  | 3.1758  | 2.8231  |
| H | -4.1125 | -2.0785 | -1.8681 | H          | 1.1129  | -5.4885 | 3.2586  |
| H | -3.1082 | 3.2173  | -5.1817 | H          | -2.0045 | -4.9163 | -5.2913 |
| H | -3.7404 | -3.9596 | 1.3896  |            |         |         |         |
| H | -3.4611 | 2.0402  | 6.3151  | <b>R3:</b> |         |         |         |
| H | -4.3886 | 7.8478  | 1.5837  | -6819.721  |         |         |         |
| H | -3.8000 | 6.2030  | 1.3837  | Cr         | -2.2932 | -1.8357 | 2.0320  |
| H | -4.0404 | -0.3862 | -4.8806 | Cr         | 2.4473  | -0.7841 | -3.1186 |
| H | -2.0289 | 7.1567  | -1.3424 | Cl         | -3.3590 | -2.5341 | 3.9610  |
| H | -2.7951 | 3.6935  | -3.0299 | Cl         | 4.0970  | 0.8412  | -3.8164 |
| H | -2.2063 | 0.5392  | -6.3186 | O          | -1.5799 | -1.1709 | 0.1897  |
| H | -1.5277 | 2.0212  | 3.8607  | O          | -1.3677 | -0.3672 | 2.8583  |
| H | -3.0415 | -6.2384 | -1.5378 | O          | -0.8136 | -3.0323 | 2.1544  |
| H | -5.1771 | 4.1608  | 4.8671  | O          | 0.1463  | -8.1069 | 0.1512  |
| H | -2.2343 | -5.8701 | 0.8057  | O          | -1.9680 | -9.0054 | 0.2572  |
| H | -2.4641 | 8.8144  | 0.4935  | O          | 0.9788  | 0.3390  | -3.7158 |
| H | -4.3192 | 0.2298  | -3.2382 | O          | 1.1282  | -2.0174 | -2.4690 |
| H | -4.3278 | -5.6417 | -0.4874 | O          | 2.6568  | -1.7781 | -4.7711 |
| H | -1.0945 | 1.7852  | -5.7051 | O          | 5.0588  | -6.6693 | -5.7216 |
| H | 0.2098  | 0.4565  | 4.2662  | O          | 4.6475  | -8.8568 | -5.5026 |
| H | -1.5580 | 3.2630  | 5.1336  | O          | -1.2430 | -3.7358 | -2.1262 |
| H | -2.0006 | -2.3936 | -0.5745 | N          | -3.8263 | -0.5908 | 1.5417  |
| H | -1.6655 | -4.4005 | -8.3085 | N          | -3.3313 | -3.1539 | 0.9018  |

|   |         |          |         |   |         |          |         |
|---|---------|----------|---------|---|---------|----------|---------|
| N | 2.4374  | 0.1830   | -1.3264 | C | 1.2576  | 0.8841   | 3.4404  |
| N | 3.9785  | -1.8188  | -2.2668 | C | 0.3423  | 0.9640   | 4.6912  |
| C | -1.9432 | 0.7788   | -1.3264 | C | 2.5916  | -5.4004  | 3.5136  |
| C | -0.2059 | -0.7532  | -0.0837 | C | 2.0594  | -3.1112  | 2.6942  |
| C | -1.2911 | 0.2394   | -0.0841 | C | 2.1346  | -8.5839  | -4.1815 |
| C | 0.3427  | 1.4119   | -6.3698 | C | 3.2317  | -0.5280  | -0.3071 |
| C | 0.4706  | -5.0235  | 2.1427  | C | 1.9911  | -3.0356  | -7.2168 |
| C | 0.6606  | -6.2934  | 1.6087  | C | 1.8443  | -3.9298  | -8.4662 |
| C | 1.0282  | 2.0478   | -2.0212 | C | 3.7086  | 0.3190   | 0.8828  |
| C | 0.5964  | 1.5090   | -3.2840 | C | 2.9179  | -7.3682  | -4.6765 |
| C | -2.8399 | 3.1759   | 4.4504  | C | 1.0408  | 1.8912   | 5.7094  |
| C | -1.8646 | 0.7333   | 3.3850  | C | 3.2981  | -2.8858  | -4.9993 |
| C | -0.6749 | -4.2680  | 1.7154  | C | 3.0236  | -3.6014  | -6.2282 |
| C | 0.5414  | 3.3057   | -1.5908 | C | 2.4183  | -1.6242  | -7.7009 |
| C | -0.2284 | -6.8434  | 0.6717  | C | 4.5119  | -0.5390  | 1.8764  |
| C | -0.1161 | -10.3433 | -0.5829 | C | 4.2576  | -3.4380  | -4.0737 |
| C | -0.3473 | 2.2617   | -4.0772 | C | 4.5873  | -2.8249  | -2.8056 |
| C | -3.6214 | 2.4562   | 3.5665  | C | 4.4560  | -1.1736  | -1.0194 |
| C | -3.1655 | 1.2292   | 3.0250  | C | 3.6604  | -4.8153  | -6.4458 |
| C | -0.8476 | 1.6684   | -5.4060 | C | 4.8747  | -4.6794  | -4.3554 |
| C | -0.7872 | -9.1055  | -0.0082 | C | 4.2501  | -7.7247  | -5.3208 |
| C | -0.3507 | 4.0282   | -2.3624 | C | 4.5568  | -5.3609  | -5.5084 |
| C | -1.5930 | 0.3315   | -5.1422 | C | 5.2148  | -2.0742  | -0.0301 |
| C | -1.6044 | -4.8698  | 0.8076  | C | 5.6889  | -1.2497  | 1.1846  |
| C | -1.3489 | -6.1504  | 0.2675  | C | 1.2309  | -3.4238  | -2.3448 |
| C | -0.7844 | 3.4924   | -3.5972 | C | -0.0517 | -4.1100  | -2.8515 |
| C | -4.0268 | 0.5765   | 2.0655  | C | -1.8564 | -2.5602  | -2.6831 |
| C | -1.8350 | 2.6149   | -6.1230 | C | 1.5252  | -3.8120  | -0.8898 |
| C | -2.8616 | -4.2671  | 0.4359  | H | -1.7002 | 0.1689   | -2.1976 |
| C | -4.6495 | -1.1447  | 0.4432  | H | -3.0334 | 0.7974   | -1.1887 |
| C | -4.7105 | -2.6850  | 0.6423  | H | -1.6036 | 1.8014   | -1.5108 |
| C | -6.0534 | -0.5463  | 0.2789  | H | 0.1990  | -1.1665  | -1.0123 |
| C | -5.4470 | -3.3563  | -0.5242 | H | 0.4239  | -0.8146  | 0.8019  |
| C | -6.8585 | -2.7588  | -0.6796 | H | 2.0358  | -3.8231  | -2.9811 |
| C | -6.7998 | -1.2342  | -0.8816 | H | -0.0340 | 0.9748   | -7.3056 |
| C | 0.0098  | -9.3064  | -2.9393 | H | -3.1930 | 4.1131   | 4.8677  |
| C | 0.6502  | -4.1751  | 4.5082  | H | -0.1931 | -3.5029  | 4.3382  |
| C | 0.7828  | -10.0091 | -1.7915 | H | 0.2715  | -5.1218  | 4.9141  |
| C | -1.0522 | 1.4884   | 4.3008  | H | -0.9470 | -8.9177  | -2.5614 |
| C | -1.5662 | 2.6817   | 4.8061  | H | 0.4862  | -10.8117 | 0.2083  |
| C | 1.8790  | 1.3296   | -1.1045 | H | 0.8776  | 3.6905   | -0.6298 |
| C | 0.8071  | -8.1403  | -3.5459 | H | -0.9253 | -0.3916  | -4.6705 |
| C | 0.6004  | -2.9505  | -6.5285 | H | -0.9144 | -11.0392 | -0.8596 |
| C | 1.4283  | -4.4373  | 3.1916  | H | -4.6024 | 2.8231   | 3.2719  |
| C | 0.2308  | -0.4435  | 5.3379  | H | -1.9508 | -0.0807  | -6.0957 |

|   |         |          |         |            |         |         |         |
|---|---------|----------|---------|------------|---------|---------|---------|
| H | -1.3619 | 3.5769   | -6.3588 | H          | 2.3150  | -6.7966 | -5.3954 |
| H | -0.7177 | 4.9941   | -2.0307 | H          | 2.6245  | -3.2789 | 1.7689  |
| H | -2.1541 | 2.1487   | -7.0634 | H          | 3.0982  | -6.6712 | -3.8478 |
| H | -2.0455 | -6.5830  | -0.4377 | H          | 3.2028  | -5.6002 | 2.6234  |
| H | -1.4881 | 4.0731   | -4.1827 | H          | 3.2312  | -4.9359 | 4.2734  |
| H | -4.9052 | 1.1538   | 1.7679  | H          | 1.9449  | -9.2754 | -5.0129 |
| H | -2.4619 | 0.5013   | -4.4910 | H          | 2.7386  | -9.1368 | -3.4510 |
| H | -4.0760 | -0.9724  | -0.4795 | H          | 1.6493  | -1.2271 | -8.3779 |
| H | -2.7279 | 2.8044   | -5.5119 | H          | 2.7475  | -2.7376 | 3.4649  |
| H | -3.4569 | -4.8535  | -0.2640 | H          | 3.8426  | -1.2869 | 2.3161  |
| H | -4.8659 | -3.2089  | -1.4464 | H          | 2.5383  | -0.9409 | -6.8588 |
| H | -5.9867 | 0.5305   | 0.0802  | H          | 1.2027  | 2.8945  | 5.2940  |
| H | -5.2594 | -2.8672  | 1.5785  | H          | 0.4554  | 1.9818  | 6.6330  |
| H | -7.4409 | -2.9788  | 0.2280  | H          | 4.3291  | 1.1413  | 0.4981  |
| H | -6.6115 | -0.6778  | 1.2173  | H          | 4.8775  | 0.0922  | 2.6970  |
| H | -5.5224 | -4.4362  | -0.3503 | H          | 2.8000  | -4.0299 | -8.9971 |
| H | -7.3740 | -3.2358  | -1.5224 | H          | 2.0183  | 1.4636  | 5.9633  |
| H | -7.8133 | -0.8217  | -0.9660 | H          | 3.4580  | -5.3984 | -7.3360 |
| H | -6.2803 | -1.0130  | -1.8259 | H          | 4.5474  | -2.8828 | 0.3028  |
| H | 0.8508  | 2.3558   | -6.6051 | H          | 3.3676  | -1.6851 | -8.2495 |
| H | 1.0129  | -7.4095  | -2.7490 | H          | 5.1037  | -0.3481 | -1.3462 |
| H | -0.2203 | -1.1591  | 4.6493  | H          | 5.4238  | -3.2941 | -2.2814 |
| H | 0.1985  | -7.6203  | -4.3000 | H          | 5.5643  | -5.1185 | -3.6401 |
| H | -0.1283 | -2.5226  | -7.2309 | H          | 6.2077  | -1.9044 | 1.8967  |
| H | 0.2587  | -3.9546  | -6.2405 | H          | 6.4153  | -0.4976 | 0.8416  |
| H | 0.8395  | 0.2015   | 2.6986  | H          | 6.0842  | -2.5375 | -0.5109 |
| H | 1.5120  | -6.8942  | 1.8996  | H          | 0.0492  | -5.1966 | -2.7208 |
| H | 1.2543  | -10.9310 | -2.1536 | H          | -0.1796 | -3.8875 | -3.9213 |
| H | 0.6490  | -2.3211  | -5.6376 | H          | -1.1180 | -1.7633 | -2.8005 |
| H | -0.2373 | -10.0337 | -3.7259 | H          | -2.6359 | -2.2538 | -1.9779 |
| H | 1.0649  | 0.7284   | -5.9209 | H          | -2.3019 | -2.7837 | -3.6685 |
| H | 2.0191  | 1.8195   | -0.1387 | H          | 0.7372  | -3.4214 | -0.2423 |
| H | 1.3244  | -3.7211  | 5.2473  | H          | 2.4855  | -3.3874 | -0.5793 |
| H | 1.5892  | -9.3531  | -1.4435 | H          | 1.5660  | -4.9010 | -0.7592 |
| H | -0.9716 | 3.2654   | 5.4987  | H          | -1.3890 | 0.8485  | 0.8101  |
| H | 2.2248  | -6.3552  | 3.9111  |            |         |         |         |
| H | 1.2892  | -2.3595  | 2.5127  | <b>R4:</b> |         |         |         |
| H | -0.3835 | -0.3933  | 6.2459  | -6819.701  |         |         |         |
| H | 1.3763  | 1.8784   | 2.9883  | Cr         | -2.3524 | -1.5199 | 1.7427  |
| H | 2.8533  | 0.7611   | 1.4030  | Cr         | 2.4801  | -0.7255 | -2.7352 |
| H | 2.6041  | -1.3510  | 0.0613  | Cl         | -3.5460 | -1.0855 | 3.7974  |
| H | 1.1182  | -3.4690  | -9.1465 | Cl         | 3.8893  | 0.9895  | -3.4269 |
| H | 1.2344  | -0.7968  | 5.6141  | O          | -1.7836 | -2.0028 | -0.0072 |
| H | 1.4808  | -4.9323  | -8.2036 | O          | -1.1509 | -0.0095 | 1.9978  |
| H | 2.2493  | 0.5172   | 3.7374  | O          | -1.1955 | -2.8677 | 2.5635  |

|   |         |         |         |   |         |         |         |
|---|---------|---------|---------|---|---------|---------|---------|
| O | -0.3304 | -8.0191 | 0.6968  | C | 0.1067  | -9.0193 | -3.0200 |
| O | -2.1731 | -8.5412 | -0.5803 | C | 0.7516  | -3.8293 | 4.6226  |
| O | 0.9229  | 0.3256  | -2.9786 | C | 0.8158  | -9.4434 | -1.7129 |
| O | 1.3193  | -2.3654 | -1.8795 | C | -0.8362 | 2.0643  | 3.1340  |
| O | 2.4024  | -1.5718 | -4.4732 | C | -1.1729 | 3.4172  | 3.2026  |
| O | 4.7525  | -6.2036 | -6.3344 | C | 1.9265  | 0.7932  | -0.2753 |
| O | 4.5572  | -8.4049 | -5.9788 | C | 0.8406  | -7.8789 | -3.7385 |
| O | -0.2736 | -5.2174 | -1.9672 | C | 0.1279  | -2.6859 | -6.0198 |
| N | -3.6934 | -0.3202 | 0.7996  | C | 1.2809  | -4.1295 | 3.1957  |
| N | -3.7342 | -2.9638 | 1.3378  | C | -0.3814 | 0.2750  | 4.8673  |
| N | 2.6216  | -0.1594 | -0.8212 | C | 1.4309  | 0.9149  | 3.2462  |
| N | 4.1631  | -1.7936 | -2.2952 | C | 0.2312  | 1.4494  | 4.0600  |
| C | -1.5188 | -1.6473 | -2.3394 | C | 2.5274  | -5.0316 | 3.3250  |
| C | 0.3780  | -2.3043 | -0.7529 | C | 1.7439  | -2.8056 | 2.5390  |
| C | -0.9060 | -1.4771 | -0.9469 | C | 2.2164  | -8.2551 | -4.3137 |
| C | 0.6293  | 2.3625  | -5.2277 | C | 3.5737  | -1.0052 | -0.0685 |
| C | 0.1712  | -4.7967 | 2.3647  | C | 1.3829  | -2.5724 | -6.9276 |
| C | 0.3203  | -6.0769 | 1.8463  | C | 1.0737  | -3.3171 | -8.2444 |
| C | 0.9507  | 1.6132  | -0.9456 | C | 4.0582  | -0.4459 | 1.2737  |
| C | 0.5311  | 1.3904  | -2.3000 | C | 2.8808  | -7.0090 | -4.9102 |
| C | -2.2233 | 3.9801  | 2.4496  | C | 0.7843  | 2.4784  | 5.0699  |
| C | -1.5646 | 1.2227  | 2.2199  | C | 3.0796  | -2.5672 | -4.9852 |
| C | -1.0702 | -4.0944 | 2.1293  | C | 2.6054  | -3.1676 | -6.2089 |
| C | 0.3785  | 2.6697  | -0.1953 | C | 1.6293  | -1.0810 | -7.2778 |
| C | -0.7136 | -6.7270 | 1.1493  | C | 5.0633  | -1.4135 | 1.9260  |
| C | -0.1856 | -9.9436 | -0.6369 | C | 4.2310  | -3.1340 | -4.3307 |
| C | -0.3739 | 2.3156  | -2.9174 | C | 4.7438  | -2.6564 | -3.0628 |
| C | -2.9987 | 3.1499  | 1.6570  | C | 4.7599  | -1.3225 | -1.0206 |
| C | -2.7169 | 1.7707  | 1.5546  | C | 3.2198  | -4.3342 | -6.6538 |
| C | -0.6889 | 2.2079  | -4.4224 | C | 4.8207  | -4.3151 | -4.8389 |
| C | -1.0460 | -8.7798 | -0.1725 | C | 4.1143  | -7.3003 | -5.7534 |
| C | -0.5472 | 3.5191  | -0.7720 | C | 4.2885  | -4.9235 | -5.9533 |
| C | -1.3376 | 0.8491  | -4.7928 | C | 5.7575  | -2.2828 | -0.3544 |
| C | -2.1281 | -4.7926 | 1.4468  | C | 6.2459  | -1.7042 | 0.9881  |
| C | -1.9426 | -6.1158 | 0.9828  | C | 1.6420  | -3.7394 | -2.2920 |
| C | -0.8958 | 3.3415  | -2.1264 | C | 0.4341  | -4.4254 | -2.9318 |
| C | -3.6579 | 0.9698  | 0.7988  | C | -1.5323 | -5.6651 | -2.4932 |
| C | -1.6552 | 3.3206  | -4.8856 | C | 2.2891  | -4.5425 | -1.1598 |
| C | -3.4269 | -4.2046 | 1.1705  | H | -1.8972 | -2.6733 | -2.4283 |
| C | -4.6789 | -1.1229 | 0.0495  | H | -2.3635 | -0.9575 | -2.4526 |
| C | -5.0194 | -2.3678 | 0.9373  | H | -0.7953 | -1.4454 | -3.1314 |
| C | -5.9562 | -0.3831 | -0.3739 | H | 0.0383  | -3.3212 | -0.5630 |
| C | -5.9958 | -3.3010 | 0.2112  | H | 0.9212  | -1.9404 | 0.1197  |
| C | -7.2773 | -2.5432 | -0.1819 | H | 2.3699  | -3.6014 | -3.0775 |
| C | -6.9407 | -1.3368 | -1.0778 | H | 0.4145  | 2.2571  | -6.3008 |

|   |         |          |         |   |         |         |         |
|---|---------|----------|---------|---|---------|---------|---------|
| H | -2.4420 | 5.0403   | 2.5281  | H | 2.2907  | -5.9759 | 3.8318  |
| H | -0.1065 | -3.1551  | 4.5776  | H | 0.9023  | -2.1251 | 2.4002  |
| H | 0.4494  | -4.7609  | 5.1191  | H | -1.2450 | 0.6171  | 5.4476  |
| H | -0.9092 | -8.6771  | -2.7843 | H | 1.9628  | 1.7421  | 2.7542  |
| H | 0.3608  | -10.3617 | 0.2156  | H | 3.2078  | -0.3015 | 1.9441  |
| H | 0.6545  | 2.7886   | 0.8476  | H | 3.0605  | -1.9572 | 0.1159  |
| H | -0.6320 | 0.0346   | -4.6363 | H | 0.2192  | -2.8306 | -8.7291 |
| H | -0.8428 | -10.7100 | -1.0597 | H | 0.3784  | -0.1231 | 5.5558  |
| H | -3.8512 | 3.5476   | 1.1097  | H | 0.8089  | -4.3678 | -8.0664 |
| H | -1.6287 | 0.8698   | -5.8530 | H | 2.1352  | 0.4096  | 3.9221  |
| H | -1.2312 | 4.3174   | -4.7096 | H | 2.1627  | -6.4689 | -5.5433 |
| H | -1.0075 | 4.3042   | -0.1846 | H | 2.2001  | -3.0253 | 1.5677  |
| H | -1.8309 | 3.2067   | -5.9623 | H | 3.1349  | -6.2997 | -4.1123 |
| H | -2.7519 | -6.6248  | 0.4808  | H | 2.9532  | -5.2630 | 2.3394  |
| H | -1.5993 | 4.0392   | -2.5648 | H | 3.2877  | -4.5048 | 3.9153  |
| H | -4.4091 | 1.5374   | 0.2433  | H | 2.1093  | -9.0275 | -5.0860 |
| H | -2.2325 | 0.6603   | -4.1869 | H | 2.8593  | -8.6806 | -3.5317 |
| H | -4.1481 | -1.5066  | -0.8325 | H | 0.7445  | -0.6830 | -7.7930 |
| H | -2.6221 | 3.2540   | -4.3688 | H | 2.4962  | -2.3237 | 3.1781  |
| H | -4.1655 | -4.8978  | 0.7584  | H | 4.5452  | -2.3528 | 2.1631  |
| H | -5.5101 | -3.6938  | -0.6948 | H | 1.8090  | -0.4936 | -6.3762 |
| H | -5.7005 | 0.4472   | -1.0444 | H | 1.2799  | 3.3170  | 4.5619  |
| H | -5.4750 | -1.9865  | 1.8617  | H | -0.0149 | 2.8770  | 5.7073  |
| H | -7.7813 | -2.1881  | 0.7293  | H | 4.5276  | 0.5346  | 1.1071  |
| H | -6.4288 | 0.0466   | 0.5215  | H | 5.4211  | -0.9926 | 2.8739  |
| H | -6.2410 | -4.1583  | 0.8514  | H | 1.9280  | -3.2804 | -8.9322 |
| H | -7.9712 | -3.2197  | -0.6978 | H | 1.5227  | 1.9800  | 5.7104  |
| H | -7.8551 | -0.7933  | -1.3496 | H | 2.8552  | -4.8473 | -7.5343 |
| H | -6.4866 | -1.7014  | -2.0116 | H | 5.2641  | -3.2518 | -0.1848 |
| H | 1.0649  | 3.3543   | -5.0526 | H | 2.4937  | -0.9884 | -7.9481 |
| H | 0.9482  | -7.0569  | -3.0192 | H | 5.2561  | -0.3714 | -1.2565 |
| H | -0.7249 | -0.5230  | 4.2084  | H | 5.6767  | -3.1244 | -2.7415 |
| H | 0.2153  | -7.4975  | -4.5599 | H | 5.6440  | -4.7833 | -4.3071 |
| H | -0.7457 | -2.2975  | -6.5593 | H | 6.9463  | -2.4054 | 1.4592  |
| H | -0.0609 | -3.7360  | -5.7606 | H | 6.7959  | -0.7709 | 0.7957  |
| H | 1.0818  | 0.2008   | 2.4986  | H | 6.6180  | -2.4575 | -1.0123 |
| H | 1.2477  | -6.6219  | 1.9692  | H | 0.7838  | -5.0757 | -3.7512 |
| H | 1.5554  | -10.2289 | -1.9126 | H | -0.2169 | -3.6615 | -3.3676 |
| H | 0.2549  | -2.1097  | -5.1018 | H | -2.1882 | -4.8087 | -2.7076 |
| H | 0.0037  | -9.8878  | -3.6876 | H | -1.9827 | -6.3038 | -1.7321 |
| H | 1.3577  | 1.6042   | -4.9327 | H | -1.3863 | -6.2450 | -3.4185 |
| H | 2.0731  | 1.0211   | 0.7757  | H | 1.6024  | -4.6985 | -0.3240 |
| H | 1.5487  | -3.3598  | 5.2163  | H | 3.1839  | -4.0192 | -0.8060 |
| H | 1.3591  | -8.5851  | -1.2939 | H | 2.5802  | -5.5310 | -1.5379 |
| H | -0.6242 | 4.0676   | 3.8740  | H | -0.6979 | -0.4134 | -0.7680 |



R5:  
-6819.747

|    |         |         |         |   |         |         |         |
|----|---------|---------|---------|---|---------|---------|---------|
| Cr | -2.3524 | -1.5199 | 1.7427  | C | -0.8958 | 3.3415  | -2.1264 |
| Cr | 2.4801  | -0.7255 | -2.7352 | C | -3.6579 | 0.9698  | 0.7988  |
| Cl | -3.5460 | -1.0855 | 3.7974  | C | -1.6552 | 3.3206  | -4.8856 |
| Cl | 3.8893  | 0.9895  | -3.4269 | C | -3.4269 | -4.2046 | 1.1705  |
| O  | -1.7836 | -2.0028 | -0.0072 | C | -4.6789 | -1.1229 | 0.0495  |
| O  | -1.1509 | -0.0095 | 1.9978  | C | -5.0194 | -2.3678 | 0.9373  |
| O  | -1.1955 | -2.8677 | 2.5635  | C | -5.9562 | -0.3831 | -0.3739 |
| O  | -0.3304 | -8.0191 | 0.6968  | C | -5.9958 | -3.3010 | 0.2112  |
| O  | -2.1731 | -8.5412 | -0.5803 | C | -7.2773 | -2.5432 | -0.1819 |
| O  | 0.9229  | 0.3256  | -2.9786 | C | -6.9407 | -1.3368 | -1.0778 |
| O  | 1.3193  | -2.3654 | -1.8795 | C | 0.1067  | -9.0193 | -3.0200 |
| O  | 2.4024  | -1.5718 | -4.4732 | C | 0.7516  | -3.8293 | 4.6226  |
| O  | 4.7525  | -6.2036 | -6.3344 | C | 0.8158  | -9.4434 | -1.7129 |
| O  | 4.5572  | -8.4049 | -5.9788 | C | -0.8362 | 2.0643  | 3.1340  |
| O  | -0.2736 | -5.2174 | -1.9672 | C | -1.1729 | 3.4172  | 3.2026  |
| N  | -3.6934 | -0.3202 | 0.7996  | C | 1.9265  | 0.7932  | -0.2753 |
| N  | -3.7342 | -2.9638 | 1.3378  | C | 0.8406  | -7.8789 | -3.7385 |
| N  | 2.6216  | -0.1594 | -0.8212 | C | 0.1279  | -2.6859 | -6.0198 |
| N  | 4.1631  | -1.7936 | -2.2952 | C | 1.2809  | -4.1295 | 3.1957  |
| C  | -1.5188 | -1.6473 | -2.3394 | C | -0.3814 | 0.2750  | 4.8673  |
| C  | 0.3780  | -2.3043 | -0.7529 | C | 1.4309  | 0.9149  | 3.2462  |
| C  | -0.9060 | -1.4771 | -0.9469 | C | 0.2312  | 1.4494  | 4.0600  |
| C  | 0.6293  | 2.3625  | -5.2277 | C | 2.5274  | -5.0316 | 3.3250  |
| C  | 0.1712  | -4.7967 | 2.3647  | C | 1.7439  | -2.8056 | 2.5390  |
| C  | 0.3203  | -6.0769 | 1.8463  | C | 2.2164  | -8.2551 | -4.3137 |
| C  | 0.9507  | 1.6132  | -0.9456 | C | 3.5737  | -1.0052 | -0.0685 |
| C  | 0.5311  | 1.3904  | -2.3000 | C | 1.3829  | -2.5724 | -6.9276 |
| C  | -2.2233 | 3.9801  | 2.4496  | C | 1.0737  | -3.3171 | -8.2444 |
| C  | -1.5646 | 1.2227  | 2.2199  | C | 4.0582  | -0.4459 | 1.2737  |
| C  | -1.0702 | -4.0944 | 2.1293  | C | 2.8808  | -7.0090 | -4.9102 |
| C  | 0.3785  | 2.6697  | -0.1953 | C | 0.7843  | 2.4784  | 5.0699  |
| C  | -0.7136 | -6.7270 | 1.1493  | C | 3.0796  | -2.5672 | -4.9852 |
| C  | -0.1856 | -9.9436 | -0.6369 | C | 2.6054  | -3.1676 | -6.2089 |
| C  | -0.3739 | 2.3156  | -2.9174 | C | 1.6293  | -1.0810 | -7.2778 |
| C  | -2.9987 | 3.1499  | 1.6570  | C | 5.0633  | -1.4135 | 1.9260  |
| C  | -2.7169 | 1.7707  | 1.5546  | C | 4.2310  | -3.1340 | -4.3307 |
| C  | -0.6889 | 2.2079  | -4.4224 | C | 4.7438  | -2.6564 | -3.0628 |
| C  | -1.0460 | -8.7798 | -0.1725 | C | 4.7599  | -1.3225 | -1.0206 |
| C  | -0.5472 | 3.5191  | -0.7720 | C | 3.2198  | -4.3342 | -6.6538 |
| C  | -1.3376 | 0.8491  | -4.7928 | C | 4.8207  | -4.3151 | -4.8389 |
| C  | -2.1281 | -4.7926 | 1.4468  | C | 4.1143  | -7.3003 | -5.7534 |
| C  | -1.9426 | -6.1158 | 0.9828  | C | 4.2885  | -4.9235 | -5.9533 |
|    |         |         |         | C | 5.7575  | -2.2828 | -0.3544 |
|    |         |         |         | C | 6.2459  | -1.7042 | 0.9881  |
|    |         |         |         | C | 1.6420  | -3.7394 | -2.2920 |

|   |         |          |         |   |         |          |         |
|---|---------|----------|---------|---|---------|----------|---------|
| C | 0.4341  | -4.4254  | -2.9318 | H | 1.0818  | 0.2008   | 2.4986  |
| C | -1.5323 | -5.6651  | -2.4932 | H | 1.2477  | -6.6219  | 1.9692  |
| C | 2.2891  | -4.5425  | -1.1598 | H | 1.5554  | -10.2289 | -1.9126 |
| H | -1.8972 | -2.6733  | -2.4283 | H | 0.2549  | -2.1097  | -5.1018 |
| H | -2.3635 | -0.9575  | -2.4526 | H | 0.0037  | -9.8878  | -3.6876 |
| H | -0.7953 | -1.4454  | -3.1314 | H | 1.3577  | 1.6042   | -4.9327 |
| H | 0.0383  | -3.3212  | -0.5630 | H | 2.0731  | 1.0211   | 0.7757  |
| H | 0.9212  | -1.9404  | 0.1197  | H | 1.5487  | -3.3598  | 5.2163  |
| H | 2.3699  | -3.6014  | -3.0775 | H | 1.3591  | -8.5851  | -1.2939 |
| H | 0.4145  | 2.2571   | -6.3008 | H | -0.6242 | 4.0676   | 3.8740  |
| H | -2.4420 | 5.0403   | 2.5281  | H | 2.2907  | -5.9759  | 3.8318  |
| H | -0.1065 | -3.1551  | 4.5776  | H | 0.9023  | -2.1251  | 2.4002  |
| H | 0.4494  | -4.7609  | 5.1191  | H | -1.2450 | 0.6171   | 5.4476  |
| H | -0.9092 | -8.6771  | -2.7843 | H | 1.9628  | 1.7421   | 2.7542  |
| H | 0.3608  | -10.3617 | 0.2156  | H | 3.2078  | -0.3015  | 1.9441  |
| H | 0.6545  | 2.7886   | 0.8476  | H | 3.0605  | -1.9572  | 0.1159  |
| H | -0.6320 | 0.0346   | -4.6363 | H | 0.2192  | -2.8306  | -8.7291 |
| H | -0.8428 | -10.7100 | -1.0597 | H | 0.3784  | -0.1231  | 5.5558  |
| H | -3.8512 | 3.5476   | 1.1097  | H | 0.8089  | -4.3678  | -8.0664 |
| H | -1.6287 | 0.8698   | -5.8530 | H | 2.1352  | 0.4096   | 3.9221  |
| H | -1.2312 | 4.3174   | -4.7096 | H | 2.1627  | -6.4689  | -5.5433 |
| H | -1.0075 | 4.3042   | -0.1846 | H | 2.2001  | -3.0253  | 1.5677  |
| H | -1.8309 | 3.2067   | -5.9623 | H | 3.1349  | -6.2997  | -4.1123 |
| H | -2.7519 | -6.6248  | 0.4808  | H | 2.9532  | -5.2630  | 2.3394  |
| H | -1.5993 | 4.0392   | -2.5648 | H | 3.2877  | -4.5048  | 3.9153  |
| H | -4.4091 | 1.5374   | 0.2433  | H | 2.1093  | -9.0275  | -5.0860 |
| H | -2.2325 | 0.6603   | -4.1869 | H | 2.8593  | -8.6806  | -3.5317 |
| H | -4.1481 | -1.5066  | -0.8325 | H | 0.7445  | -0.6830  | -7.7930 |
| H | -2.6221 | 3.2540   | -4.3688 | H | 2.4962  | -2.3237  | 3.1781  |
| H | -4.1655 | -4.8978  | 0.7584  | H | 4.5452  | -2.3528  | 2.1631  |
| H | -5.5101 | -3.6938  | -0.6948 | H | 1.8090  | -0.4936  | -6.3762 |
| H | -5.7005 | 0.4472   | -1.0444 | H | 1.2799  | 3.3170   | 4.5619  |
| H | -5.4750 | -1.9865  | 1.8617  | H | -0.0149 | 2.8770   | 5.7073  |
| H | -7.7813 | -2.1881  | 0.7293  | H | 4.5276  | 0.5346   | 1.1071  |
| H | -6.4288 | 0.0466   | 0.5215  | H | 5.4211  | -0.9926  | 2.8739  |
| H | -6.2410 | -4.1583  | 0.8514  | H | 1.9280  | -3.2804  | -8.9322 |
| H | -7.9712 | -3.2197  | -0.6978 | H | 1.5227  | 1.9800   | 5.7104  |
| H | -7.8551 | -0.7933  | -1.3496 | H | 2.8552  | -4.8473  | -7.5343 |
| H | -6.4866 | -1.7014  | -2.0116 | H | 5.2641  | -3.2518  | -0.1848 |
| H | 1.0649  | 3.3543   | -5.0526 | H | 2.4937  | -0.9884  | -7.9481 |
| H | 0.9482  | -7.0569  | -3.0192 | H | 5.2561  | -0.3714  | -1.2565 |
| H | -0.7249 | -0.5230  | 4.2084  | H | 5.6767  | -3.1244  | -2.7415 |
| H | 0.2153  | -7.4975  | -4.5599 | H | 5.6440  | -4.7833  | -4.3071 |
| H | -0.7457 | -2.2975  | -6.5593 | H | 6.9463  | -2.4054  | 1.4592  |
| H | -0.0609 | -3.7360  | -5.7606 | H | 6.7959  | -0.7709  | 0.7957  |

|            |         |         |         |   |         |         |         |
|------------|---------|---------|---------|---|---------|---------|---------|
| H          | 6.6180  | -2.4575 | -1.0123 | C | -2.5687 | 1.7112  | -3.4210 |
| H          | 0.7838  | -5.0757 | -3.7512 | C | -2.8144 | 6.0787  | -1.3940 |
| H          | -0.2169 | -3.6615 | -3.3676 | C | -2.9527 | 3.0443  | -3.3111 |
| H          | -2.1882 | -4.8087 | -2.7076 | C | -3.5494 | 7.3654  | -1.7433 |
| H          | -1.9827 | -6.3038 | -1.7321 | C | -1.6149 | 4.1464  | 3.6282  |
| H          | -1.3863 | -6.2450 | -3.4185 | C | -0.0250 | 2.7050  | 2.3717  |
| H          | 1.6024  | -4.6985 | -0.3240 | C | -2.0238 | 0.2353  | -5.3991 |
| H          | 3.1839  | -4.0192 | -0.8060 | C | -3.9235 | -0.3978 | -3.8692 |
| H          | 2.5802  | -5.5310 | -1.5379 | C | -3.5186 | -5.0679 | -0.5968 |
| H          | -0.6979 | -0.4134 | -0.7680 | C | -3.7675 | 8.2421  | -0.5002 |
|            |         |         |         | C | -3.1625 | 0.7915  | -4.5021 |
|            |         |         |         | C | -3.3483 | -3.7099 | 0.0951  |
| <b>A1:</b> |         |         |         | C | -4.9481 | -5.1809 | -1.1655 |
| -6394.244  |         |         |         | C | -3.5841 | -2.5446 | -0.9146 |
| Cr         | -1.8110 | -1.4892 | 1.1730  | C | -1.4605 | 2.7693  | 2.9474  |
| Cr         | 0.3640  | -0.9169 | -1.9613 | C | -2.5624 | 1.3168  | 1.1210  |
| Cl         | -3.4994 | -1.5725 | 2.8336  | C | -2.5171 | 2.5567  | 1.8470  |
| Cl         | 1.5905  | -0.0610 | -3.7990 | C | -4.8009 | 7.6168  | 0.4570  |
| N          | -2.0714 | -3.4752 | 0.7874  | C | -3.6351 | 1.0969  | 0.1935  |
| N          | -3.2645 | -1.2770 | -0.2169 | C | -4.1593 | 1.5410  | -5.4129 |
| N          | 0.8995  | 0.6916  | -0.8677 | C | -5.0222 | -2.6426 | -1.4569 |
| N          | 2.0798  | -1.6946 | -1.1703 | C | -3.8606 | -0.1624 | -0.4814 |
| O          | -1.2722 | -0.0697 | -2.5193 | C | -5.2871 | -4.0124 | -2.1112 |
| O          | -2.2935 | 5.8489  | -0.3159 | C | -1.6192 | 1.6731  | 4.0353  |
| O          | -0.4245 | -1.9546 | 2.4583  | C | -3.4983 | 3.5137  | 1.5922  |
| O          | -2.8112 | 5.2543  | -2.4747 | C | -4.5916 | 2.1063  | -0.0441 |
| O          | -1.6105 | 0.4247  | 1.3015  | C | -4.5207 | 3.2876  | 0.6625  |
| O          | -5.5050 | 4.5039  | -1.6592 | C | -6.2524 | 7.7851  | -0.0424 |
| O          | -5.5746 | 4.2457  | 0.6214  | C | -6.0337 | 4.7071  | -0.5827 |
| O          | 0.0375  | -2.6075 | -2.8677 | C | -7.2183 | 6.7214  | 0.5261  |
| O          | -0.4578 | -1.6483 | -0.2898 | C | -7.3293 | 5.4743  | -0.3816 |
| C          | -1.2976 | 3.4967  | -1.6069 | C | -0.8717 | 2.1525  | -1.6853 |
| C          | 0.9552  | -5.2939 | 1.7625  | C | 2.3290  | -4.1219 | 3.3595  |
| C          | -0.9054 | -4.6742 | -4.5721 | C | 2.1000  | -5.2483 | 2.5369  |
| C          | 1.4701  | -3.0267 | 3.3898  | C | 2.9287  | -2.0437 | 5.2414  |
| C          | 1.6664  | -1.8576 | 4.3715  | C | 0.0077  | -4.9234 | -3.3586 |
| C          | -2.2148 | -3.9626 | -4.1552 | C | 0.2656  | 1.8158  | -0.8658 |
| C          | -1.5429 | 1.2187  | -2.5384 | C | 0.5179  | -3.7943 | -2.6127 |
| C          | -0.1540 | -3.7938 | -5.6071 | C | 0.4213  | -6.2010 | -2.9927 |
| C          | 0.0506  | -4.2050 | 1.7299  | C | 1.3641  | -6.4337 | -1.9651 |
| C          | -1.3037 | -5.9912 | -5.2746 | C | 1.5577  | -4.0260 | -1.6410 |
| C          | 0.4416  | -1.7670 | 5.3203  | C | 2.0281  | 0.4260  | 0.0509  |
| C          | 0.3269  | -3.0227 | 2.5068  | C | 1.9484  | -5.3514 | -1.3330 |
| C          | 1.8210  | -0.5150 | 3.6152  | C | 2.3207  | -2.9577 | -1.0280 |
| C          | -2.3399 | 3.9218  | -2.4020 | C | 2.9435  | -0.6275 | -0.6345 |
| C          | -1.1733 | -4.3863 | 0.9742  |   |         |         |         |

|   |         |         |         |            |         |         |         |
|---|---------|---------|---------|------------|---------|---------|---------|
| C | 2.8576  | 1.6686  | 0.4215  | H          | -0.8795 | 1.8416  | 4.8311  |
| C | 4.0788  | -1.0511 | 0.3029  | H          | -4.1133 | -3.6032 | 0.8777  |
| C | 4.0801  | 1.3072  | 1.2887  | H          | -3.6760 | 2.3806  | -5.9282 |
| C | 4.9306  | 0.1851  | 0.6603  | H          | -5.2050 | -1.8598 | -2.1962 |
| H | -2.7562 | -4.5860 | -3.4365 | H          | -5.0126 | 1.9254  | -4.8390 |
| H | 0.7392  | -6.1615 | 1.1448  | H          | -4.6846 | -4.0922 | -3.0228 |
| H | 0.3542  | -2.6857 | 5.9153  | H          | -4.6436 | -0.1353 | -1.2365 |
| H | -2.0033 | -2.9908 | -3.7075 | H          | -3.5031 | 4.4568  | 2.1204  |
| H | 0.7634  | -4.2998 | -5.9361 | H          | -4.5395 | 0.8434  | -6.1698 |
| H | 2.6629  | -0.5860 | 2.9205  | H          | -2.6236 | 1.7176  | 4.4732  |
| H | 0.1102  | -2.8247 | -5.1767 | H          | -6.3410 | -4.0733 | -2.4138 |
| H | -0.4217 | -6.5312 | -5.6425 | H          | -1.4741 | 0.6765  | 3.6150  |
| H | -1.8636 | -6.6532 | -4.5998 | H          | -6.6020 | 8.7934  | 0.2225  |
| H | 0.5769  | -0.9181 | 6.0046  | H          | -6.2766 | 7.7293  | -1.1414 |
| H | 2.0247  | 0.2916  | 4.3335  | H          | -5.7125 | -2.4815 | -0.6159 |
| H | -2.8535 | -3.8169 | -5.0377 | H          | -5.3844 | 1.9372  | -0.7635 |
| H | -1.3100 | -5.3840 | 0.5525  | H          | -6.8892 | 6.4123  | 1.5267  |
| H | -1.3130 | -0.3508 | -4.8146 | H          | -7.6795 | 5.7723  | -1.3751 |
| H | -2.7680 | -5.1717 | -1.3919 | H          | -8.2276 | 7.1412  | 0.6301  |
| H | 0.1222  | 3.5167  | 1.6471  | H          | -8.0596 | 4.7779  | 0.0522  |
| H | -2.9628 | 7.8959  | -2.5065 | H          | -0.8066 | 4.1728  | -0.9233 |
| H | -1.5045 | 4.9626  | 2.9019  | H          | 3.2023  | -4.1257 | 4.0015  |
| H | -2.8080 | 8.3553  | 0.0175  | H          | 0.0303  | -2.4604 | -0.0921 |
| H | -3.2818 | -0.9238 | -3.1612 | H          | 2.8003  | -6.0775 | 2.5431  |
| H | -0.7980 | -3.6339 | -6.4835 | H          | 3.0147  | -1.1931 | 5.9286  |
| H | -0.4785 | -1.6211 | 4.7493  | H          | 0.0289  | -7.0588 | -3.5271 |
| H | -0.8364 | 4.2519  | 4.3940  | H          | 3.8363  | -2.0824 | 4.6240  |
| H | -1.9449 | -5.7524 | -6.1319 | H          | 2.8708  | -2.9629 | 5.8382  |
| H | -2.8555 | -2.6490 | -1.7291 | H          | 0.6007  | 2.6189  | -0.2150 |
| H | 0.7011  | 2.8335  | 3.1869  | H          | 1.6552  | -7.4488 | -1.7143 |
| H | 0.9152  | -0.2748 | 3.0574  | H          | 1.6013  | -0.0342 | 0.9510  |
| H | -1.4817 | 1.0587  | -5.8808 | H          | 3.3708  | -0.1429 | -1.5248 |
| H | -5.6561 | -5.1742 | -0.3229 | H          | 2.2397  | 2.3887  | 0.9674  |
| H | -4.8228 | -0.0332 | -3.3550 | H          | 3.1852  | 2.1454  | -0.5135 |
| H | -4.1042 | 9.2424  | -0.8087 | H          | 2.7130  | -5.4989 | -0.5750 |
| H | -3.3497 | -5.8789 | 0.1235  | H          | 3.1702  | -3.2826 | -0.4228 |
| H | -2.5924 | 4.2397  | 4.1179  | H          | 3.6603  | -1.5115 | 1.2092  |
| H | -5.0696 | -6.1383 | -1.6892 | H          | 3.7347  | 0.9917  | 2.2794  |
| H | 0.1487  | 1.7434  | 1.8872  | H          | 4.7094  | -1.8031 | -0.1885 |
| H | -2.4632 | -0.4015 | -6.1801 | H          | 5.3977  | 0.5623  | -0.2623 |
| H | -3.7395 | 3.4519  | -3.9306 | H          | 4.6976  | 2.2036  | 1.4359  |
| H | -4.4993 | 7.0878  | -2.2164 | H          | 5.7403  | -0.1030 | 1.3436  |
| H | -4.2375 | -1.0971 | -4.6562 |            |         |         |         |
| H | -4.5597 | 6.5565  | 0.5867  | <b>A2:</b> |         |         |         |
| H | -4.7148 | 8.0722  | 1.4535  | -6587.287  |         |         |         |

|    |         |         |         |   |         |         |         |
|----|---------|---------|---------|---|---------|---------|---------|
| Cr | 0.0799  | -1.5667 | -3.1510 | C | -3.2799 | 1.9985  | 5.1239  |
| Cr | -2.4763 | -1.3445 | 2.3173  | C | -4.2532 | -3.9507 | -2.0751 |
| Cl | 1.4956  | -0.0081 | -4.4623 | C | -4.1134 | -0.1270 | 0.1566  |
| Cl | -4.2507 | -2.0768 | 3.6314  | C | -4.5059 | -2.6588 | -1.2696 |
| O  | -0.8672 | -2.8345 | -2.0405 | C | -4.4348 | 2.2988  | -5.2465 |
| O  | -0.2478 | -2.7372 | -4.6965 | C | -4.2714 | 1.1140  | 0.8739  |
| O  | -6.2141 | 4.2973  | 0.5055  | C | -4.2640 | 7.1136  | 0.6504  |
| O  | -5.8291 | 4.0276  | -1.7597 | C | -3.7497 | 2.6711  | 2.7251  |
| O  | -2.6522 | 0.5401  | 2.5486  | C | -3.5449 | 1.4131  | 2.0666  |
| O  | -2.1601 | 4.9268  | -1.7823 | C | -2.9766 | 3.0356  | 4.0075  |
| O  | -0.8858 | -1.4682 | 3.3871  | C | -3.3271 | -2.3947 | -0.3154 |
| O  | -1.2510 | 5.1264  | 0.3377  | C | -3.9795 | -5.1577 | -1.1599 |
| O  | 4.6921  | -6.4211 | 3.4098  | C | -3.1123 | -3.6018 | 0.6233  |
| O  | -1.4735 | -0.3689 | -3.3407 | C | -3.4384 | 1.2270  | -4.7423 |
| N  | 1.8174  | -2.5698 | -2.7791 | C | -2.8384 | 7.6581  | 0.4326  |
| N  | 0.5819  | -0.5529 | -1.4672 | C | -2.8201 | -4.8764 | -0.1798 |
| N  | -3.4653 | -1.1860 | 0.5563  | C | -4.2633 | -0.0157 | -4.3088 |
| N  | -2.0712 | -3.1953 | 1.6116  | C | -2.5042 | 0.8434  | -5.9231 |
| C  | 5.7779  | -4.1162 | 3.5841  | C | -1.4529 | 3.0651  | 3.6987  |
| C  | 4.3825  | -1.9394 | 0.0901  | C | -3.3722 | 4.4331  | 4.5413  |
| C  | 3.3706  | -1.3999 | 1.1146  | C | -2.1346 | 7.0890  | -0.8165 |
| C  | 3.6816  | -2.7396 | -1.0258 | C | -2.7131 | 3.0433  | -3.1007 |
| C  | 2.2874  | -0.5403 | 0.4347  | C | -1.7969 | 5.6187  | -0.6596 |
| C  | 2.6009  | -1.8888 | -1.7161 | C | -2.5901 | 1.7391  | -3.5602 |
| C  | 2.2344  | -3.6259 | -3.4076 | C | -1.0915 | -3.9732 | 1.9688  |
| C  | 2.2225  | -5.4594 | -5.0105 | C | -1.9377 | 3.5372  | -2.0380 |
| C  | 1.5829  | -1.3189 | -0.6876 | C | 1.3139  | 0.2549  | 4.4952  |
| C  | 1.5904  | -4.2917 | -4.5181 | C | -0.0242 | -2.4523 | 3.6732  |
| C  | 1.7042  | -6.1504 | -6.0888 | C | -0.2477 | -0.7128 | 6.2526  |
| C  | 0.5361  | -5.6658 | -6.7132 | C | -1.7832 | -4.9097 | -8.2118 |
| C  | 0.3882  | -3.8096 | -5.1432 | C | -0.0882 | -3.6948 | 2.9674  |
| C  | 0.1372  | 0.6199  | -1.1236 | C | -1.1170 | -2.5792 | -7.5800 |
| C  | -0.1341 | -4.5214 | -6.2863 | C | -1.6148 | 0.8805  | -2.9281 |
| C  | 2.2352  | -0.9466 | 6.4873  | C | -2.6057 | -3.9551 | -6.0513 |
| C  | 1.8442  | -4.5249 | 4.1887  | C | 1.0737  | -0.9354 | 5.4651  |
| C  | 1.8907  | -3.3031 | 4.8916  | C | 4.5375  | -5.8234 | 2.0447  |
| C  | -0.8457 | 1.4033  | -1.8331 | C | 0.9910  | -2.2568 | 4.6699  |
| C  | 5.6995  | -5.4442 | 2.8805  | C | -1.3908 | -4.0027 | -7.0198 |
| C  | -7.1741 | 5.9038  | -0.9734 | C | 0.8576  | -4.7124 | 3.2367  |
| C  | -6.7462 | 7.1119  | -0.1075 | C | -1.0235 | 2.7377  | -1.3874 |
| C  | -6.3270 | 4.6616  | -0.8275 | H | 6.2798  | -4.2181 | 4.5531  |
| C  | -5.3074 | 7.6330  | -0.3627 | H | 6.3481  | -3.3978 | 2.9815  |
| C  | -5.3365 | 3.2654  | 0.9591  | H | 4.7781  | -3.7065 | 3.7550  |
| C  | -5.1592 | 2.0622  | 0.3118  | H | 5.1287  | -2.5736 | 0.5873  |
| C  | -4.6565 | 3.5582  | 2.1514  | H | 3.8838  | -0.8071 | 1.8827  |

|   |         |         |         |            |         |         |         |
|---|---------|---------|---------|------------|---------|---------|---------|
| H | 4.9311  | -1.0983 | -0.3593 | H          | -3.4226 | 3.7269  | -3.5444 |
| H | 4.4281  | -3.0725 | -1.7577 | H          | -3.1040 | 0.4691  | -6.7637 |
| H | 2.8932  | -2.2416 | 1.6361  | H          | -1.1059 | 2.0785  | 3.3892  |
| H | 3.2185  | -3.6437 | -0.6015 | H          | -3.7440 | -6.0437 | -1.7638 |
| H | 3.1795  | -4.0819 | -3.1027 | H          | -4.4403 | 4.4929  | 4.7850  |
| H | 3.1322  | -5.8027 | -4.5218 | H          | -2.6976 | -5.7358 | 0.4930  |
| H | 2.7488  | 0.3669  | 0.0165  | H          | -2.8691 | 8.7544  | 0.3550  |
| H | 1.5552  | -0.2155 | 1.1839  | H          | -4.9686 | 0.2506  | -3.5091 |
| H | 3.0715  | -1.0287 | -2.2148 | H          | -4.8883 | -5.3973 | -0.5870 |
| H | 1.0369  | -2.1715 | -0.2595 | H          | -1.9416 | 1.7200  | -6.2658 |
| H | 2.1894  | -7.0464 | -6.4626 | H          | 0.5054  | 0.3279  | 3.7666  |
| H | 0.5333  | 1.0967  | -0.2251 | H          | -0.9006 | 3.3656  | 4.5990  |
| H | 2.1173  | -1.7426 | 7.2323  | H          | -2.4049 | -2.2831 | -0.9188 |
| H | 3.2098  | -1.0675 | 5.9987  | H          | -2.6758 | -4.4944 | -8.6942 |
| H | 0.1541  | -6.2123 | -7.5671 | H          | -2.8103 | 4.6326  | 5.4610  |
| H | 2.2475  | 0.0106  | 7.0206  | H          | -1.1032 | -0.6692 | 5.5775  |
| H | 2.5784  | -5.2987 | 4.3863  | H          | -2.0068 | -2.2069 | -8.1051 |
| H | -1.1127 | -3.5930 | -2.6085 | H          | -3.5966 | -0.8045 | -3.9560 |
| H | 2.6613  | -3.1828 | 5.6431  | H          | -2.2215 | 7.4148  | 1.3063  |
| H | -0.4463 | 3.1131  | -0.5540 | H          | -3.1294 | 5.2267  | 3.8247  |
| H | 4.6593  | -6.5275 | 1.2267  | H          | -1.1872 | 7.6237  | -0.9739 |
| H | -8.2070 | 5.6314  | -0.7145 | H          | -1.2355 | 3.7833  | 2.8992  |
| H | -7.4669 | 7.9152  | -0.3113 | H          | -1.8841 | -4.7335 | -0.7347 |
| H | -7.1571 | 6.1658  | -2.0358 | H          | -1.7903 | 0.0745  | -5.6240 |
| H | -6.8617 | 6.8492  | 0.9509  | H          | -0.9965 | -4.9479 | 1.4895  |
| H | -5.6634 | 1.8433  | -0.6190 | H          | -3.5005 | -3.6180 | -6.5915 |
| H | -5.4410 | -2.7390 | -0.6933 | H          | 3.7021  | -5.1350 | 1.9563  |
| H | -5.0020 | 7.3758  | -1.3871 | H          | 1.3579  | 1.1937  | 5.0619  |
| H | -5.3105 | 8.7318  | -0.3128 | H          | -0.1933 | 0.2312  | 6.8101  |
| H | -3.0470 | 0.9853  | 4.7944  | H          | -2.0215 | -5.9318 | -7.8910 |
| H | -5.1144 | -4.1557 | -2.7235 | H          | -0.9898 | -4.9602 | -8.9678 |
| H | -4.3394 | 2.0359  | 5.4070  | H          | -0.8677 | -1.8878 | -6.7743 |
| H | -5.0281 | 1.8747  | -6.0654 | H          | 2.2664  | 0.1340  | 3.9626  |
| H | -4.8547 | 4.5171  | 2.6088  | H          | -0.2823 | -2.6003 | -8.2917 |
| H | -4.5949 | -0.1521 | -0.8202 | H          | -2.4095 | -3.2642 | -5.2306 |
| H | -3.3904 | -3.7829 | -2.7315 | H          | -0.4071 | -1.5258 | 6.9719  |
| H | -5.1243 | 2.6235  | -4.4576 | H          | 0.7927  | -5.6481 | 2.6867  |
| H | -4.6198 | -1.8316 | -1.9774 | H          | -2.8115 | -4.9529 | -5.6413 |
| H | -3.9155 | 3.1824  | -5.6369 | H          | 6.6531  | -5.9184 | 2.6531  |
| H | -4.0251 | -3.7438 | 1.2220  |            |         |         |         |
| H | -2.6796 | 2.2281  | 6.0138  | <b>A3:</b> |         |         |         |
| H | -4.5982 | 7.3956  | 1.6600  | -6587.320  |         |         |         |
| H | -4.2331 | 6.0178  | 0.6385  | Cr         | 1.4645  | -1.0526 | -3.2520 |
| H | -4.8466 | -0.3935 | -5.1591 | Cr         | -2.8345 | -1.3959 | 2.0870  |
| H | -2.7348 | 7.2191  | -1.7198 | Cl         | 2.3607  | 0.1840  | -5.1324 |

|    |         |         |         |   |         |         |         |
|----|---------|---------|---------|---|---------|---------|---------|
| Cl | -4.6813 | -1.9595 | 3.3807  | C | -5.1821 | -2.8851 | -1.2620 |
| O  | 0.8990  | -1.9779 | -1.6690 | C | -4.3073 | 1.3742  | -4.0891 |
| O  | 0.9781  | -2.6135 | -4.3111 | C | -4.7177 | 0.9757  | 0.6467  |
| O  | -6.5300 | 4.1724  | 0.0371  | C | -4.4854 | 6.7758  | 0.8345  |
| O  | -5.0852 | 4.4605  | -1.7293 | C | -4.2019 | 2.5936  | 2.4510  |
| O  | -3.0833 | 0.4991  | 2.3549  | C | -3.9740 | 1.3114  | 1.8324  |
| O  | -1.7553 | 4.9899  | -1.7658 | C | -3.5207 | 2.9563  | 3.7809  |
| O  | -1.5234 | -1.6811 | 3.4689  | C | -3.9422 | -2.5958 | -0.4001 |
| O  | -1.9695 | 4.5448  | 0.4743  | C | -4.7807 | -5.3890 | -0.9488 |
| O  | -1.2384 | -1.0724 | 0.8047  | C | -3.6873 | -3.7530 | 0.6047  |
| O  | -0.2379 | -0.0901 | -3.3887 | C | -2.9171 | 0.7064  | -3.9968 |
| N  | 3.3352  | -1.8383 | -3.0035 | C | -3.0112 | 7.2120  | 0.9027  |
| N  | 2.1975  | 0.3893  | -2.0162 | C | -3.5133 | -5.0881 | -0.1249 |
| N  | -3.9914 | -1.3430 | 0.3963  | C | -3.1174 | -0.6686 | -3.3097 |
| N  | -2.5856 | -3.3150 | 1.4767  | C | -2.3891 | 0.4773  | -5.4369 |
| C  | -0.1599 | 1.2155  | 1.2591  | C | -1.9798 | 2.9752  | 3.6196  |
| C  | 6.4380  | -0.2153 | -1.3180 | C | -3.9428 | 4.3578  | 4.2755  |
| C  | 5.6536  | 0.5552  | -0.2422 | C | -2.2369 | 6.8208  | -0.3637 |
| C  | 5.5882  | -1.3631 | -1.8975 | C | -2.2802 | 2.8421  | -2.7566 |
| C  | 4.3355  | 1.1120  | -0.8120 | C | -1.9978 | 5.3202  | -0.4606 |
| C  | 4.2693  | -0.8274 | -2.4717 | C | -1.9195 | 1.5775  | -3.2129 |
| C  | 3.6629  | -3.0693 | -3.2134 | C | -1.5044 | -3.9980 | 1.6665  |
| C  | 3.2362  | -5.4361 | -3.6425 | C | -1.3687 | 3.6573  | -2.0684 |
| C  | 3.4765  | -0.0203 | -1.3998 | C | 0.3165  | 0.1875  | 4.8233  |
| C  | 2.7634  | -4.1035 | -3.6803 | C | -0.4959 | -2.5063 | 3.4477  |
| C  | 2.4113  | -6.4971 | -3.9756 | C | -0.7862 | -1.4957 | 6.3526  |
| C  | 1.0671  | -6.2380 | -4.3205 | C | -1.7558 | -5.9772 | -4.8153 |
| C  | 1.4240  | -3.8322 | -4.1319 | C | -0.4207 | -3.6203 | 2.5417  |
| C  | 1.6259  | 1.5183  | -1.7571 | C | -1.1460 | -3.8242 | -5.9330 |
| C  | 0.5460  | -4.9480 | -4.3895 | C | -0.5762 | 1.0969  | -2.9632 |
| C  | 1.6921  | -1.1750 | 6.3943  | C | -1.5337 | -3.9140 | -3.4290 |
| C  | 1.7879  | -4.2030 | 3.3812  | C | 0.4578  | -1.2149 | 5.4664  |
| C  | 1.6882  | -3.1474 | 4.3116  | C | -1.2878 | -0.3447 | -0.4797 |
| C  | 0.3168  | 1.9333  | -2.2004 | C | 0.5769  | -2.3087 | 4.3897  |
| C  | -0.1961 | -0.0595 | 0.4669  | C | -0.9449 | -4.6736 | -4.6507 |
| C  | -6.9269 | 6.0096  | -1.3928 | C | 0.7290  | -4.4450 | 2.5257  |
| C  | -6.7766 | 7.1127  | -0.3124 | C | -0.0992 | 3.2176  | -1.7795 |
| C  | -6.0633 | 4.8023  | -1.0966 | H | 0.1583  | 1.0340  | 2.2893  |
| C  | -5.3255 | 7.6196  | -0.1445 | H | 0.5555  | 1.8984  | 0.7852  |
| C  | -5.7002 | 3.1730  | 0.6111  | H | -1.1353 | 1.7030  | 1.2714  |
| C  | -5.5574 | 1.9366  | 0.0333  | H | 7.3700  | -0.6157 | -0.8976 |
| C  | -5.0565 | 3.4875  | 1.8177  | H | 6.2610  | 1.3741  | 0.1652  |
| C  | -3.9157 | 1.9245  | 4.8705  | H | 6.7130  | 0.4738  | -2.1303 |
| C  | -5.0645 | -4.2579 | -1.9550 | H | 6.1516  | -1.8856 | -2.6809 |
| C  | -4.6631 | -0.3102 | -0.0015 | H | 5.4216  | -0.1274 | 0.5894  |

|   |         |         |         |            |         |         |         |
|---|---------|---------|---------|------------|---------|---------|---------|
| H | 5.3646  | -2.0952 | -1.1074 | H          | -4.6692 | -6.3450 | -1.4761 |
| H | 4.6793  | -3.4083 | -2.9953 | H          | -5.0285 | 4.4245  | 4.4248  |
| H | 4.2634  | -5.6126 | -3.3283 | H          | -3.3358 | -5.8893 | 0.6035  |
| H | 4.5465  | 1.8470  | -1.6022 | H          | -2.9491 | 8.2996  | 1.0497  |
| H | 3.7874  | 1.6297  | -0.0148 | H          | -3.4921 | -0.5282 | -2.2909 |
| H | 4.4725  | -0.1403 | -3.3040 | H          | -5.6348 | -5.4899 | -0.2619 |
| H | 3.2113  | -0.7291 | -0.6009 | H          | -2.3150 | 1.4355  | -5.9669 |
| H | 2.7783  | -7.5179 | -3.9452 | H          | -0.5668 | 0.2270  | 4.1860  |
| H | 2.1345  | 2.2435  | -1.1177 | H          | -1.5244 | 3.3250  | 4.5569  |
| H | 1.8294  | -2.1276 | 6.9228  | H          | -3.0574 | -2.5224 | -1.0503 |
| H | 2.6085  | -0.9495 | 5.8326  | H          | -2.8133 | -5.7234 | -4.9624 |
| H | 0.4183  | -7.0827 | -4.5241 | H          | -3.4517 | 4.5497  | 5.2367  |
| H | 1.5430  | -0.3857 | 7.1414  | H          | -1.6965 | -1.5026 | 5.7485  |
| H | 2.6778  | -4.8233 | 3.3549  | H          | -2.2205 | -3.6478 | -6.0857 |
| H | 0.8776  | -2.9332 | -1.8300 | H          | -2.1812 | -1.2232 | -3.2765 |
| H | 2.5155  | -2.9929 | 4.9942  | H          | -2.5314 | 6.7278  | 1.7619  |
| H | 0.5853  | 3.8492  | -1.2215 | H          | -3.6329 | 5.1384  | 3.5676  |
| H | -1.0698 | -0.9736 | -1.3320 | H          | -1.2472 | 7.3010  | -0.3728 |
| H | -7.9766 | 5.6936  | -1.4405 | H          | -1.6904 | 3.6484  | 2.8048  |
| H | -7.4321 | 7.9450  | -0.6012 | H          | -2.6398 | -5.0393 | -0.7888 |
| H | -6.6269 | 6.3988  | -2.3708 | H          | -1.4040 | 0.0065  | -5.4097 |
| H | -7.1446 | 6.7218  | 0.6452  | H          | -1.3722 | -4.9521 | 1.1503  |
| H | -6.0726 | 1.6948  | -0.8903 | H          | -2.5499 | -3.5765 | -3.6668 |
| H | -6.0704 | -2.8590 | -0.6146 | H          | -2.0982 | 0.3735  | -0.5488 |
| H | -4.8413 | 7.6399  | -1.1315 | H          | 0.2169  | 0.9443  | 5.6135  |
| H | -5.3396 | 8.6571  | 0.2203  | H          | -0.8702 | -0.7129 | 7.1194  |
| H | -3.6583 | 0.9090  | 4.5617  | H          | -1.6734 | -6.6084 | -3.9208 |
| H | -5.9882 | -4.4657 | -2.5104 | H          | -1.4152 | -6.5542 | -5.6850 |
| H | -4.9955 | 1.9689  | 5.0633  | H          | -0.6317 | -2.8666 | -5.8407 |
| H | -4.9862 | 0.7038  | -4.6309 | H          | 1.2070  | 0.4252  | 4.2258  |
| H | -5.2413 | 4.4643  | 2.2388  | H          | -0.7529 | -4.3612 | -6.8067 |
| H | -5.2573 | -0.3808 | -0.9132 | H          | -0.9307 | -3.0411 | -3.1711 |
| H | -4.2470 | -4.2207 | -2.6853 | H          | -0.6801 | -2.4665 | 6.8546  |
| H | -4.7234 | 1.5672  | -3.0911 | H          | 0.7656  | -5.2716 | 1.8193  |
| H | -5.2942 | -2.1104 | -2.0281 | H          | -1.5792 | -4.5848 | -2.5602 |
| H | -4.2578 | 2.3263  | -4.6312 | H          | 0.7385  | -0.5721 | 0.2601  |
| H | -4.5684 | -3.8110 | 1.2589  |            |         |         |         |
| H | -3.3834 | 2.1627  | 5.8020  | <b>A4:</b> |         |         |         |
| H | -4.9412 | 6.8423  | 1.8329  | -6587.258  |         |         |         |
| H | -4.5050 | 5.7200  | 0.5552  | Cr         | 1.6043  | -0.7493 | -3.2531 |
| H | -3.8565 | -1.2517 | -3.8780 | Cr         | -3.0749 | -1.6935 | 2.3402  |
| H | -2.7506 | 7.1508  | -1.2724 | Cl         | 2.4548  | 0.0836  | -5.4001 |
| H | -3.2742 | 3.2369  | -2.9127 | Cl         | -5.0005 | -2.1082 | 3.7732  |
| H | -3.0859 | -0.1738 | -5.9840 | O          | 1.0241  | -1.3663 | -1.4592 |
| H | -1.6090 | 1.9750  | 3.4057  | O          | 1.0164  | -2.4613 | -4.0110 |



|   |         |         |         |   |         |         |         |
|---|---------|---------|---------|---|---------|---------|---------|
| O | -6.4825 | 4.0822  | 0.1191  | C | -4.3961 | 6.9448  | 0.5761  |
| O | -5.1904 | 4.1819  | -1.7993 | C | -4.2201 | 2.4442  | 2.5749  |
| O | -3.2597 | 0.2499  | 2.5593  | C | -4.0964 | 1.1187  | 2.0129  |
| O | -1.5715 | 5.4356  | -2.1384 | C | -3.4798 | 2.8207  | 3.8751  |
| O | -1.7695 | -2.0699 | 3.7495  | C | -4.3838 | -2.9045 | -0.0188 |
| O | -1.5993 | 5.0355  | 0.1414  | C | -5.4157 | -5.6706 | -0.4138 |
| O | -1.5701 | -1.5341 | 1.0802  | C | -4.1499 | -4.0463 | 1.0065  |
| O | -0.0471 | 0.2672  | -3.5292 | C | -2.7017 | 1.1125  | -4.3072 |
| N | 3.4568  | -1.5837 | -2.9588 | C | -2.9774 | 7.5580  | 0.5493  |
| N | 2.4569  | 0.8585  | -2.3565 | C | -4.0834 | -5.4124 | 0.3120  |
| N | -4.3659 | -1.6202 | 0.7433  | C | -2.9952 | -0.2044 | -3.5375 |
| N | -3.0143 | -3.6788 | 1.8726  | C | -2.1068 | 0.7741  | -5.7029 |
| C | 0.2061  | 0.9596  | 0.8865  | C | -1.9445 | 2.7444  | 3.6461  |
| C | 6.7113  | 0.2065  | -1.7670 | C | -3.8109 | 4.2618  | 4.3319  |
| C | 6.0166  | 1.1657  | -0.7857 | C | -2.1937 | 7.2427  | -0.7336 |
| C | 5.8021  | -0.9889 | -2.1109 | C | -2.0448 | 3.2812  | -3.1324 |
| C | 4.6770  | 1.6676  | -1.3592 | C | -1.7711 | 5.7942  | -0.8156 |
| C | 4.4531  | -0.5122 | -2.6805 | C | -1.7035 | 1.9914  | -3.5242 |
| C | 3.8055  | -2.7991 | -3.2685 | C | -1.9281 | -4.3860 | 1.9852  |
| C | 3.4685  | -5.1886 | -3.6290 | C | -1.1334 | 4.1156  | -2.4676 |
| C | 3.7544  | 0.4901  | -1.7244 | C | 0.3290  | -0.3187 | 4.9584  |
| C | 2.9189  | -3.8839 | -3.6125 | C | -0.8008 | -2.9755 | 3.7550  |
| C | 2.6843  | -6.2814 | -3.9417 | C | -0.9552 | -1.7620 | 6.6036  |
| C | 1.3207  | -6.0836 | -4.2449 | C | -1.4842 | -5.9966 | -4.8518 |
| C | 1.5380  | -3.6804 | -3.9488 | C | -0.8229 | -4.1065 | 2.8661  |
| C | 1.8722  | 2.0041  | -2.1437 | C | -0.9543 | -3.7525 | -5.8366 |
| C | 0.7182  | -4.8266 | -4.2576 | C | -0.3801 | 1.5052  | -3.2045 |
| C | 1.5525  | -1.7315 | 6.6231  | C | -1.4997 | -3.9828 | -3.3643 |
| C | 1.3192  | -4.8729 | 3.7277  | C | 0.3096  | -1.6829 | 5.7022  |
| C | 1.3207  | -3.7866 | 4.6287  | C | -1.4644 | -0.7739 | -0.1276 |
| C | 0.5420  | 2.3874  | -2.5384 | C | 0.2953  | -2.8437 | 4.6845  |
| C | -0.0577 | -0.3500 | 0.1378  | C | -0.7820 | -4.6455 | -4.5753 |
| C | -6.9622 | 5.8224  | -1.4285 | C | 0.2481  | -5.0312 | 2.8697  |
| C | -6.7929 | 7.0212  | -0.4581 | C | 0.1410  | 3.6987  | -2.1784 |
| C | -6.1043 | 4.6244  | -1.1006 | H | 0.5826  | 0.6749  | 1.8730  |
| C | -5.3732 | 7.6338  | -0.3977 | H | 0.8901  | 1.6827  | 0.4334  |
| C | -5.7063 | 3.0407  | 0.7289  | H | -0.7352 | 1.4982  | 1.0385  |
| C | -5.6581 | 1.7729  | 0.2041  | H | 7.6595  | -0.1542 | -1.3494 |
| C | -5.0221 | 3.3663  | 1.9114  | H | 6.6658  | 2.0198  | -0.5565 |
| C | -3.8955 | 1.8531  | 5.0182  | H | 6.9591  | 0.7504  | -2.6911 |
| C | -5.7084 | -4.5603 | -1.4394 | H | 6.3135  | -1.6312 | -2.8375 |
| C | -4.8956 | -0.5308 | 0.2570  | H | 5.8327  | 0.6407  | 0.1633  |
| C | -5.6891 | -3.1582 | -0.7989 | H | 5.6230  | -1.5941 | -1.2097 |
| C | -4.0537 | 1.8340  | -4.5246 | H | 4.8491  | -3.0959 | -3.1426 |
| C | -4.8764 | 0.7826  | 0.8505  | H | 4.5201  | -5.3163 | -3.3815 |

|   |         |         |         |            |         |         |         |
|---|---------|---------|---------|------------|---------|---------|---------|
| H | 4.8567  | 2.2752  | -2.2579 | H          | -3.0554 | 8.6494  | 0.6568  |
| H | 4.1926  | 2.3161  | -0.6201 | H          | -3.4200 | 0.0167  | -2.5496 |
| H | 4.6110  | -0.0010 | -3.6401 | H          | -6.2192 | -5.7098 | 0.3360  |
| H | 3.4984  | -0.0670 | -0.8101 | H          | -1.9538 | 1.6886  | -6.2890 |
| H | 3.1021  | -7.2828 | -3.9490 | H          | -0.5488 | -0.2243 | 4.3179  |
| H | 2.4131  | 2.7718  | -1.5865 | H          | -1.4179 | 3.0800  | 4.5494  |
| H | 1.5910  | -2.6582 | 7.2098  | H          | -3.5326 | -2.8845 | -0.7154 |
| H | 2.4875  | -1.6410 | 6.0563  | H          | -2.5469 | -5.8142 | -5.0515 |
| H | 0.7249  | -6.9586 | -4.4752 | H          | -3.2811 | 4.4664  | 5.2693  |
| H | 1.5086  | -0.8932 | 7.3288  | H          | -1.8624 | -1.7029 | 6.0001  |
| H | 2.1463  | -5.5756 | 3.7222  | H          | -2.0220 | -3.6292 | -6.0617 |
| H | 0.8577  | -2.3252 | -1.3954 | H          | -2.0831 | -0.7879 | -3.4099 |
| H | 2.1667  | -3.6925 | 5.2996  | H          | -2.4068 | 7.1780  | 1.4046  |
| H | 0.8371  | 4.3551  | -1.6665 | H          | -3.4870 | 5.0100  | 3.5971  |
| H | -1.5744 | -1.3556 | -1.0484 | H          | -1.2744 | 7.8474  | -0.7771 |
| H | -8.0114 | 5.5032  | -1.4074 | H          | -1.6490 | 3.3919  | 2.8104  |
| H | -7.4940 | 7.7951  | -0.7989 | H          | -3.2540 | -5.4497 | -0.4095 |
| H | -6.7073 | 6.1274  | -2.4478 | H          | -1.1484 | 0.2613  | -5.6047 |
| H | -7.1140 | 6.7172  | 0.5462  | H          | -1.8766 | -5.3566 | 1.4841  |
| H | -6.2087 | 1.5231  | -0.6966 | H          | -2.5351 | -3.7357 | -3.6341 |
| H | -6.5329 | -3.0508 | -0.1027 | H          | -2.1436 | 0.0856  | -0.1580 |
| H | -4.9520 | 7.6554  | -1.4128 | H          | 0.3254  | 0.5053  | 5.6843  |
| H | -5.4654 | 8.6844  | -0.0822 | H          | -0.9533 | -0.9355 | 7.3272  |
| H | -3.7018 | 0.8148  | 4.7457  | H          | -1.4166 | -6.6762 | -3.9933 |
| H | -6.6809 | -4.7319 | -1.9183 | H          | -1.0634 | -6.5023 | -5.7295 |
| H | -4.9646 | 1.9572  | 5.2405  | H          | -0.5090 | -2.7698 | -5.6758 |
| H | -4.7302 | 1.1636  | -5.0682 | H          | 1.2350  | -0.2291 | 4.3442  |
| H | -5.1346 | 4.3720  | 2.2911  | H          | -0.4735 | -4.2196 | -6.7054 |
| H | -5.4931 | -0.5991 | -0.6546 | H          | -0.9932 | -3.0609 | -3.0738 |
| H | -4.9531 | -4.6020 | -2.2390 | H          | -0.9669 | -2.7055 | 7.1652  |
| H | -4.5339 | 2.1095  | -3.5784 | H          | 0.2096  | -5.8773 | 2.1862  |
| H | -5.8231 | -2.4048 | -1.5839 | H          | -1.5215 | -4.6686 | -2.5067 |
| H | -3.9371 | 2.7449  | -5.1243 | H          | 0.5976  | -1.1023 | 0.5615  |
| H | -5.0180 | -4.0356 | 1.6814  |            |         |         |         |
| H | -3.3303 | 2.0934  | 5.9286  | <b>A5:</b> |         |         |         |
| H | -4.7971 | 7.0481  | 1.5954  | -6587.339  |         |         |         |
| H | -4.3296 | 5.8688  | 0.3853  | Cr         | 1.3801  | -0.2790 | -3.0121 |
| H | -3.7255 | -0.8038 | -4.0977 | Cr         | -2.6192 | -1.7325 | 2.1562  |
| H | -2.7551 | 7.4973  | -1.6369 | Cl         | 2.4177  | 1.2350  | -4.4174 |
| H | -3.0342 | 3.6784  | -3.3122 | Cl         | -4.1347 | -0.7806 | 3.7954  |
| H | -2.8004 | 0.1254  | -6.2545 | O          | 0.5619  | -1.7000 | -1.7442 |
| H | -1.6447 | 1.7194  | 3.4269  | O          | 1.2516  | -1.7208 | -4.2857 |
| H | -5.3988 | -6.6438 | -0.9208 | O          | -5.9943 | 3.8273  | 0.0726  |
| H | -4.8836 | 4.3950  | 4.5180  | O          | -4.9979 | 4.5595  | -1.8617 |
| H | -3.9014 | -6.1984 | 1.0566  | O          | -2.1690 | 0.0221  | 1.4183  |

|   |         |         |         |   |         |         |         |
|---|---------|---------|---------|---|---------|---------|---------|
| O | -2.2256 | 5.5568  | -2.4757 | C | -1.7005 | 2.7013  | 2.3776  |
| O | -1.1647 | -1.8177 | 3.4361  | C | -4.7177 | -3.2061 | 0.7840  |
| O | -2.0623 | 5.6584  | -0.1929 | C | -6.5182 | -5.4194 | 1.5936  |
| O | -1.7458 | -2.8410 | 0.8488  | C | -4.6673 | -3.8165 | 2.2253  |
| O | -0.4115 | 0.3806  | -3.2373 | C | -3.0239 | 1.0123  | -4.2364 |
| N | 3.1790  | -1.0027 | -2.3510 | C | -3.6080 | 8.0280  | -0.0754 |
| N | 1.5941  | 0.9305  | -1.4251 | C | -5.1116 | -5.2861 | 2.2095  |
| N | -4.2218 | -1.8242 | 0.8939  | C | -3.3370 | -0.2032 | -3.3215 |
| N | -3.3222 | -3.5467 | 2.7603  | C | -2.3288 | 0.5205  | -5.5324 |
| C | 0.7002  | -2.8857 | 0.9745  | C | -0.3873 | 2.5107  | 1.5824  |
| C | 5.3737  | 0.3101  | 0.5908  | C | -1.7735 | 4.1824  | 2.8150  |
| C | 4.2174  | 0.8909  | 1.4257  | C | -3.0996 | 7.4825  | -1.4196 |
| C | 4.8658  | -0.7291 | -0.4307 | C | -2.5242 | 3.3251  | -3.2755 |
| C | 3.1380  | 1.5119  | 0.5190  | C | -2.4188 | 6.1347  | -1.2533 |
| C | 3.7968  | -0.1066 | -1.3434 | C | -2.1258 | 2.0107  | -3.4885 |
| C | 3.6973  | -2.1369 | -2.6947 | C | -2.5830 | -4.4226 | 3.3497  |
| C | 3.8478  | -4.2914 | -3.8306 | C | -1.7415 | 4.2271  | -2.5377 |
| C | 2.6331  | 0.4717  | -0.4870 | C | 1.5096  | -0.5774 | 3.6324  |
| C | 3.1452  | -3.0751 | -3.6484 | C | -0.6329 | -2.8921 | 3.9595  |
| C | 3.3745  | -5.2671 | -4.6893 | C | 0.1978  | -0.5580 | 5.7942  |
| C | 2.1608  | -5.0513 | -5.3770 | C | -0.3318 | -4.9004 | -6.7943 |
| C | 1.9314  | -2.8434 | -4.3818 | C | -1.2545 | -4.1907 | 3.8823  |
| C | 1.0005  | 2.0796  | -1.3285 | C | 0.1579  | -2.4531 | -6.9262 |
| C | 1.4202  | -3.8781 | -5.2429 | C | -0.8530 | 1.5936  | -2.9666 |
| C | 2.5354  | -1.4447 | 5.7260  | C | -1.0553 | -3.4168 | -4.9214 |
| C | 0.6751  | -5.2066 | 4.9750  | C | 1.2091  | -1.3657 | 4.9356  |
| C | 1.2476  | -3.9244 | 5.1172  | C | -0.5011 | -1.4841 | -0.7427 |
| C | -0.1224 | 2.4973  | -2.1221 | C | 0.6255  | -2.7658 | 4.6573  |
| C | -0.5664 | -2.7574 | 0.1141  | C | 0.0749  | -3.6651 | -5.9614 |
| C | -7.1743 | 5.4177  | -1.2016 | C | -0.5748 | -5.3219 | 4.3920  |
| C | -7.2506 | 6.5589  | -0.1572 | C | -0.5755 | 3.8242  | -1.9314 |
| C | -5.9240 | 4.5680  | -1.0728 | H | 0.7401  | -2.0533 | 1.6785  |
| C | -6.1190 | 7.5961  | -0.3249 | H | 0.6644  | -3.8145 | 1.5529  |
| C | -4.9703 | 2.8696  | 0.3455  | H | 1.6028  | -2.8793 | 0.3472  |
| C | -5.2177 | 1.5505  | 0.0371  | H | 6.1216  | -0.1547 | 1.2459  |
| C | -3.8345 | 3.2445  | 1.0753  | H | 4.5950  | 1.6464  | 2.1263  |
| C | -1.6566 | 1.8449  | 3.6701  | H | 5.8749  | 1.1275  | 0.0501  |
| C | -6.5505 | -4.8382 | 0.1681  | H | 5.7095  | -1.0987 | -1.0267 |
| C | -4.7394 | -0.8160 | 0.2803  | H | 3.7587  | 0.0938  | 2.0257  |
| C | -6.1132 | -3.3616 | 0.1665  | H | 4.4259  | -1.5874 | 0.0981  |
| C | -4.3770 | 1.6484  | -4.6246 | H | 4.6309  | -2.4594 | -2.2283 |
| C | -4.3075 | 0.5563  | 0.4541  | H | 4.7696  | -4.4470 | -3.2737 |
| C | -4.8282 | 7.2400  | 0.4405  | H | 3.5534  | 2.3708  | -0.0279 |
| C | -2.8945 | 2.3012  | 1.4921  | H | 2.2999  | 1.8710  | 1.1271  |
| C | -3.0924 | 0.9213  | 1.1308  | H | 4.2305  | 0.7317  | -1.9075 |

|   |         |         |         |   |         |         |         |
|---|---------|---------|---------|---|---------|---------|---------|
| H | 2.1949  | -0.3706 | 0.0701  | H | -0.3064 | 1.4786  | 1.2284  |
| H | 3.9164  | -6.1973 | -4.8249 | H | -6.8256 | -6.4737 | 1.5859  |
| H | 1.3178  | 2.7855  | -0.5626 | H | -2.6927 | 4.3763  | 3.3835  |
| H | 2.3958  | -1.9385 | 6.6961  | H | -5.1082 | -5.6866 | 3.2315  |
| H | 3.3028  | -1.9917 | 5.1617  | H | -3.8763 | 9.0880  | -0.1888 |
| H | 1.7953  | -5.8388 | -6.0261 | H | -3.7985 | 0.1321  | -2.3842 |
| H | 2.9005  | -0.4257 | 5.9066  | H | -7.2382 | -4.8733 | 2.2217  |
| H | 1.2002  | -6.0808 | 5.3471  | H | -2.1356 | 1.3681  | -6.2029 |
| H | 0.2912  | -2.4488 | -2.3030 | H | 0.5952  | -0.3886 | 3.0673  |
| H | 2.2059  | -3.8511 | 5.6187  | H | 0.4716  | 2.7389  | 2.2313  |
| H | -0.0209 | 4.4975  | -1.2905 | H | -3.9711 | -3.7461 | 0.1867  |
| H | -1.4457 | -1.2836 | -1.2512 | H | -1.2979 | -4.7003 | -7.2729 |
| H | -8.0475 | 4.7647  | -1.0831 | H | -0.9175 | 4.3920  | 3.4694  |
| H | -8.2273 | 7.0481  | -0.2723 | H | -0.7491 | -0.4339 | 5.2653  |
| H | -7.1797 | 5.8428  | -2.2103 | H | -0.8185 | -2.3050 | -7.4072 |
| H | -7.2185 | 6.1249  | 0.8506  | H | -2.4222 | -0.7510 | -3.0885 |
| H | -6.1386 | 1.2687  | -0.4651 | H | -2.7932 | 7.9642  | 0.6549  |
| H | -6.8278 | -2.7605 | 0.7478  | H | -1.7327 | 4.8622  | 1.9593  |
| H | -5.8981 | 7.6998  | -1.3977 | H | -2.3737 | 8.1710  | -1.8756 |
| H | -6.4623 | 8.5832  | 0.0173  | H | -0.3855 | 3.1942  | 0.7276  |
| H | -1.5027 | 0.7891  | 3.4544  | H | -4.3911 | -5.8729 | 1.6202  |
| H | -7.5562 | -4.9328 | -0.2616 | H | -1.3804 | 0.0310  | -5.3020 |
| H | -2.5974 | 1.9351  | 4.2240  | H | -2.9554 | -5.4419 | 3.4877  |
| H | -4.9967 | 0.8855  | -5.1121 | H | -2.0172 | -3.3275 | -5.4438 |
| H | -3.7131 | 4.2880  | 1.3290  | H | -0.2082 | -0.6043 | -0.1689 |
| H | -5.6071 | -0.9532 | -0.3691 | H | 1.9711  | 0.3858  | 3.8926  |
| H | -5.8652 | -5.4158 | -0.4702 | H | 0.6133  | 0.4351  | 6.0159  |
| H | -4.9062 | 2.0190  | -3.7375 | H | -0.4366 | -5.7932 | -6.1642 |
| H | -6.1148 | -2.9766 | -0.8613 | H | 0.4047  | -5.1105 | -7.5807 |
| H | -4.2439 | 2.4826  | -5.3256 | H | 0.4292  | -1.5449 | -6.3854 |
| H | -5.3563 | -3.2245 | 2.8440  | H | 2.2124  | -1.1418 | 3.0059  |
| H | -0.8331 | 2.2065  | 4.3029  | H | 0.9075  | -2.6430 | -7.7055 |
| H | -4.9836 | 7.4458  | 1.5086  | H | -0.8800 | -2.4911 | -4.3688 |
| H | -4.6095 | 6.1701  | 0.3644  | H | 0.0126  | -1.0807 | 6.7420  |
| H | -4.0337 | -0.8763 | -3.8410 | H | -1.0567 | -6.2950 | 4.3112  |
| H | -3.9136 | 7.3606  | -2.1433 | H | -1.1213 | -4.2606 | -4.2201 |
| H | -3.4705 | 3.6898  | -3.6444 | H | -0.5626 | -3.6032 | -0.6126 |
| H | -2.9861 | -0.1914 | -6.0516 |   |         |         |         |

## VII. X-ray Crystallography Conditions and Coordinates

X-ray diffraction quality crystals of the  $\mu$ -hydroxide non-tethered chromium salen complex were obtained by refluxing (*R,R*-salcy)CrCl in acetonitrile at 75 °C for 16 hours and allowing the solvent volume to be reduced by three fourths. Crystals were collected and rinsed with cold acetonitrile.

X-ray diffraction data was collected on a Bruker APEX 2 CCD Kappa diffractometer (Mo K $\alpha$ ,  $\lambda$  = 0.71073 Å) at 173 K. The structures were solved through intrinsic phasing using SHELXT<sup>18</sup> and refined against  $F^2$  on all data by full-matrix least squares with SHELXL<sup>19</sup> following established refinement strategies.<sup>20</sup> All non-hydrogen atoms were refined anisotropically. Hydrogen atoms were included in the model at geometrically calculated positions and refined using a riding model. Hydrogen atoms bound to oxygen were located in the difference Fourier synthesis and subsequently refined semi-freely with the help of distance restraints. The isotropic displacement parameters of all hydrogen atoms were fixed to 1.2 times the  $U$  value of the atoms they are linked to (1.5 times for methyl groups). A partially occupied solvent molecule of acetonitrile was included in the unit cell but could not be satisfactorily modeled. Therefore, that solvent was treated as a diffuse contribution to the overall scattering without using specific atom positions by the solvent masking function in Olex2.<sup>21</sup> Details of the data quality and a summary of the residual values of all the refinements are listed in Table S4-S8.

**Table S4.** Crystal data and structure refinement for  $\mu$ -hydroxide non-tethered chromium salen complex complex.

|                                   |                                                                                                                            |
|-----------------------------------|----------------------------------------------------------------------------------------------------------------------------|
| Identification code               | $\mu$ -hydroxide non-tethered chromium salen complex                                                                       |
| Empirical formula                 | C <sub>75</sub> H <sub>109.5</sub> Cl Cr <sub>2</sub> N <sub>5.5</sub> O <sub>5</sub>                                      |
| Formula weight                    | 1307.62                                                                                                                    |
| Temperature                       | 173.15 K                                                                                                                   |
| Wavelength                        | 0.71073 Å                                                                                                                  |
| Crystal system                    | Orthorhombic                                                                                                               |
| Space group                       | P 21 21 21                                                                                                                 |
| Unit cell dimensions              | a = 17.0512(8) Å $\alpha = 90^\circ$ .<br>b = 20.0506(9) Å $\beta = 90^\circ$ .<br>c = 22.7296(10) Å $\gamma = 90^\circ$ . |
| Volume                            | 7771.0(6) Å <sup>3</sup>                                                                                                   |
| Z                                 | 4                                                                                                                          |
| Density (calculated)              | 1.118 Mg/m <sup>3</sup>                                                                                                    |
| Absorption coefficient            | 0.361 mm <sup>-1</sup>                                                                                                     |
| F(000)                            | 2768                                                                                                                       |
| Crystal size                      | 0.15 x 0.1 x 0.05 mm <sup>3</sup>                                                                                          |
| Theta range for data collection   | 1.354 to 26.372°.                                                                                                          |
| Index ranges                      | -20 ≤ h ≤ 21                                                                                                               |
| Reflections collected             | 63537                                                                                                                      |
| Independent reflections           | 15881 [R(int) = 0.0647]                                                                                                    |
| Completeness to theta = 25.242°   | 99.9 %                                                                                                                     |
| Absorption correction             | Semi-empirical from equivalents                                                                                            |
| Refinement method                 | Full-matrix least-squares on F <sup>2</sup>                                                                                |
| Data / restraints / parameters    | 15881 / 1 / 812                                                                                                            |
| Goodness-of-fit on F <sup>2</sup> | 1.026                                                                                                                      |
| Final R indices [I > 2σ(I)]       | R <sub>1</sub> = 0.0511                                                                                                    |
| R indices (all data)              | R <sub>1</sub> = 0.0673                                                                                                    |
| Absolute structure parameter      | 0.024(8)                                                                                                                   |
| Extinction coefficient            | n/a                                                                                                                        |
| Largest diff. peak and hole       | 0.280 and -0.307 e.Å <sup>-3</sup>                                                                                         |

**Table S5.** Atomic coordinates ( $\times 10^4$ ) and equivalent isotropic displacement parameters ( $\text{\AA}^2 \times 10^3$ ) for the  $\mu$ -hydroxide non-tethered chromium salen complex. U(eq) is defined as one third of the trace of orthogonalized  $U^{ij}$  tensor.

|       | x        | y       | z       | U(eq) |
|-------|----------|---------|---------|-------|
| Cr(1) | 9716(1)  | 529(1)  | 7328(1) | 19(1) |
| Cr(2) | 8702(1)  | 2247(1) | 7257(1) | 21(1) |
| Cl(1) | 10426(1) | -450(1) | 7519(1) | 33(1) |
| O(1)  | 10550(2) | 862(1)  | 6832(1) | 22(1) |
| O(2)  | 9128(2)  | 80(1)   | 6726(1) | 22(1) |
| O(3)  | 8013(2)  | 1999(2) | 7896(1) | 28(1) |
| O(4)  | 7980(2)  | 2134(1) | 6616(1) | 24(1) |
| O(5)  | 9068(2)  | 1337(1) | 7146(1) | 22(1) |
| N(1)  | 10243(2) | 951(2)  | 8031(1) | 20(1) |
| N(2)  | 8921(2)  | 262(2)  | 7938(1) | 20(1) |
| N(3)  | 9528(2)  | 2498(2) | 7850(2) | 23(1) |
| N(4)  | 9522(2)  | 2587(2) | 6691(2) | 23(1) |
| N(5)  | 8256(2)  | 3209(2) | 7363(2) | 31(1) |
| C(1)  | 10979(2) | 1071(2) | 8057(2) | 23(1) |
| C(2)  | 11529(2) | 1038(2) | 7575(2) | 23(1) |
| C(3)  | 12321(2) | 1118(2) | 7708(2) | 25(1) |
| C(4)  | 12902(2) | 1095(2) | 7292(2) | 26(1) |
| C(5)  | 12655(2) | 984(2)  | 6711(2) | 25(1) |
| C(6)  | 11885(2) | 902(2)  | 6536(2) | 22(1) |
| C(7)  | 11283(2) | 928(2)  | 6978(2) | 21(1) |
| C(8)  | 13766(2) | 1194(2) | 7467(2) | 32(1) |
| C(9)  | 13861(3) | 1874(2) | 7766(2) | 41(1) |
| C(10) | 14320(3) | 1176(3) | 6940(2) | 48(1) |
| C(11) | 14019(3) | 646(3)  | 7895(2) | 50(1) |
| C(12) | 11657(3) | 762(2)  | 5895(2) | 30(1) |
| C(13) | 11111(3) | 1306(2) | 5661(2) | 39(1) |
| C(14) | 12377(3) | 749(3)  | 5484(2) | 47(1) |
| C(15) | 11255(3) | 78(2)   | 5847(2) | 39(1) |
| C(16) | 8225(2)  | 55(2)   | 7822(2) | 21(1) |

|       |          |          |          |       |
|-------|----------|----------|----------|-------|
| C(17) | 7928(2)  | -120(2)  | 7249(2)  | 22(1) |
| C(18) | 8398(2)  | -131(2)  | 6734(2)  | 20(1) |
| C(19) | 8064(2)  | -390(2)  | 6202(2)  | 21(1) |
| C(20) | 7303(2)  | -614(2)  | 6216(2)  | 24(1) |
| C(21) | 6825(2)  | -603(2)  | 6719(2)  | 23(1) |
| C(22) | 7147(2)  | -354(2)  | 7224(2)  | 23(1) |
| C(23) | 8575(2)  | -422(2)  | 5642(2)  | 22(1) |
| C(24) | 8914(3)  | 276(2)   | 5487(2)  | 32(1) |
| C(25) | 8109(3)  | -658(3)  | 5105(2)  | 38(1) |
| C(26) | 9248(3)  | -921(2)  | 5735(2)  | 29(1) |
| C(27) | 5976(3)  | -866(2)  | 6688(2)  | 33(1) |
| C(28) | 5957(3)  | -1549(2) | 6381(3)  | 52(2) |
| C(29) | 5608(3)  | -933(4)  | 7297(3)  | 79(2) |
| C(30) | 5479(3)  | -388(3)  | 6320(3)  | 48(1) |
| C(31) | 9713(2)  | 986(2)   | 8543(2)  | 26(1) |
| C(32) | 9218(2)  | 344(2)   | 8546(2)  | 25(1) |
| C(33) | 8622(3)  | 355(3)   | 9040(2)  | 37(1) |
| C(34) | 9038(3)  | 451(3)   | 9628(2)  | 43(1) |
| C(35) | 9495(3)  | 1098(3)  | 9632(2)  | 41(1) |
| C(36) | 10110(2) | 1111(3)  | 9128(2)  | 32(1) |
| C(37) | 9377(3)  | 2670(2)  | 8385(2)  | 29(1) |
| C(38) | 8629(2)  | 2606(2)  | 8677(2)  | 26(1) |
| C(39) | 7976(2)  | 2281(2)  | 8419(2)  | 25(1) |
| C(40) | 7259(2)  | 2253(2)  | 8744(2)  | 27(1) |
| C(41) | 7249(3)  | 2539(2)  | 9301(2)  | 30(1) |
| C(42) | 7895(3)  | 2857(2)  | 9564(2)  | 33(1) |
| C(43) | 8577(3)  | 2883(2)  | 9246(2)  | 30(1) |
| C(44) | 6519(2)  | 1944(2)  | 8468(2)  | 31(1) |
| C(45) | 5815(3)  | 1971(3)  | 8893(2)  | 42(1) |
| C(46) | 6654(3)  | 1209(2)  | 8302(2)  | 39(1) |
| C(47) | 6303(3)  | 2354(3)  | 7918(2)  | 43(1) |
| C(48) | 7800(3)  | 3177(2)  | 10178(2) | 38(1) |
| C(49) | 7439(3)  | 2666(3)  | 10610(2) | 48(1) |



|       |          |         |          |       |
|-------|----------|---------|----------|-------|
| C(50) | 7245(4)  | 3766(3) | 10125(3) | 63(2) |
| C(51) | 8575(4)  | 3420(4) | 10421(2) | 69(2) |
| C(52) | 9513(2)  | 2475(2) | 6138(2)  | 26(1) |
| C(53) | 8879(2)  | 2184(2) | 5804(2)  | 24(1) |
| C(54) | 9008(3)  | 2089(2) | 5200(2)  | 31(1) |
| C(55) | 8429(3)  | 1880(2) | 4825(2)  | 31(1) |
| C(56) | 7681(3)  | 1789(2) | 5078(2)  | 28(1) |
| C(57) | 7500(2)  | 1876(2) | 5665(2)  | 25(1) |
| C(58) | 8123(2)  | 2065(2) | 6053(2)  | 24(1) |
| C(59) | 8545(3)  | 1769(3) | 4168(2)  | 36(1) |
| C(60) | 8081(4)  | 2317(3) | 3840(2)  | 54(2) |
| C(61) | 9408(3)  | 1830(4) | 3993(3)  | 71(2) |
| C(62) | 8245(3)  | 1081(2) | 3982(2)  | 43(1) |
| C(63) | 6672(3)  | 1786(2) | 5905(2)  | 34(1) |
| C(64) | 6088(3)  | 1586(3) | 5422(3)  | 62(2) |
| C(65) | 6671(3)  | 1232(2) | 6383(2)  | 41(1) |
| C(66) | 6379(3)  | 2440(3) | 6172(2)  | 47(1) |
| C(67) | 10166(2) | 2943(2) | 6986(2)  | 27(1) |
| C(68) | 10304(2) | 2580(2) | 7575(2)  | 24(1) |
| C(69) | 10931(3) | 2928(2) | 7951(2)  | 29(1) |
| C(70) | 11686(2) | 3018(2) | 7605(2)  | 37(1) |
| C(71) | 11511(3) | 3394(2) | 7034(2)  | 37(1) |
| C(72) | 10927(3) | 3013(2) | 6650(2)  | 34(1) |
| C(73) | 7972(3)  | 3689(3) | 7486(2)  | 44(1) |
| C(74) | 7596(3)  | 4318(3) | 7674(4)  | 84(2) |

**Table S6.** Bond lengths (Å) and angles (°) for the  $\mu$ -hydroxide non-tethered chromium salen complex.

|             |            |
|-------------|------------|
| Cr(1)-Cl(1) | 2.3477(12) |
| Cr(1)-O(1)  | 1.934(3)   |
| Cr(1)-O(2)  | 1.920(3)   |
| Cr(1)-O(5)  | 2.003(3)   |
| Cr(1)-N(1)  | 2.019(3)   |
| Cr(1)-N(2)  | 2.012(3)   |
| Cr(2)-O(3)  | 1.934(3)   |
| Cr(2)-O(4)  | 1.922(3)   |
| Cr(2)-O(5)  | 1.945(3)   |
| Cr(2)-N(3)  | 2.013(3)   |
| Cr(2)-N(4)  | 2.018(3)   |
| Cr(2)-N(5)  | 2.088(4)   |
| O(1)-C(7)   | 1.300(5)   |
| O(2)-C(18)  | 1.313(5)   |
| O(3)-C(39)  | 1.317(5)   |
| O(4)-C(58)  | 1.309(5)   |
| N(1)-C(1)   | 1.280(5)   |
| N(1)-C(31)  | 1.475(5)   |
| N(2)-C(16)  | 1.285(5)   |
| N(2)-C(32)  | 1.481(5)   |
| N(3)-C(37)  | 1.289(5)   |
| N(3)-C(68)  | 1.472(5)   |
| N(4)-C(52)  | 1.278(5)   |
| N(4)-C(67)  | 1.472(5)   |
| N(5)-C(73)  | 1.112(6)   |
| C(1)-C(2)   | 1.444(6)   |
| C(2)-C(3)   | 1.394(5)   |
| C(2)-C(7)   | 1.437(6)   |
| C(3)-C(4)   | 1.370(6)   |
| C(4)-C(5)   | 1.404(6)   |
| C(4)-C(8)   | 1.539(6)   |
| C(5)-C(6)   | 1.382(6)   |
| C(6)-C(7)   | 1.437(6)   |

|             |          |
|-------------|----------|
| C(6)-C(12)  | 1.535(6) |
| C(8)-C(9)   | 1.533(6) |
| C(8)-C(10)  | 1.527(6) |
| C(8)-C(11)  | 1.529(7) |
| C(12)-C(13) | 1.529(7) |
| C(12)-C(14) | 1.542(6) |
| C(12)-C(15) | 1.537(6) |
| C(16)-C(17) | 1.441(6) |
| C(17)-C(18) | 1.419(6) |
| C(17)-C(22) | 1.415(5) |
| C(18)-C(19) | 1.433(5) |
| C(19)-C(20) | 1.373(5) |
| C(19)-C(23) | 1.545(6) |
| C(20)-C(21) | 1.406(6) |
| C(21)-C(22) | 1.366(6) |
| C(21)-C(27) | 1.543(6) |
| C(23)-C(24) | 1.554(6) |
| C(23)-C(25) | 1.532(6) |
| C(23)-C(26) | 1.537(6) |
| C(27)-C(28) | 1.536(7) |
| C(27)-C(29) | 1.526(7) |
| C(27)-C(30) | 1.528(7) |
| C(31)-C(32) | 1.538(6) |
| C(31)-C(36) | 1.515(6) |
| C(32)-C(33) | 1.515(6) |
| C(33)-C(34) | 1.526(6) |
| C(34)-C(35) | 1.513(7) |
| C(35)-C(36) | 1.553(6) |
| C(37)-C(38) | 1.446(6) |
| C(38)-C(39) | 1.417(6) |
| C(38)-C(43) | 1.409(6) |
| C(39)-C(40) | 1.430(6) |
| C(40)-C(41) | 1.388(6) |
| C(40)-C(44) | 1.539(6) |
| C(41)-C(42) | 1.406(6) |

|                  |            |
|------------------|------------|
| C(42)-C(43)      | 1.371(6)   |
| C(42)-C(48)      | 1.546(6)   |
| C(44)-C(45)      | 1.541(6)   |
| C(44)-C(46)      | 1.538(7)   |
| C(44)-C(47)      | 1.542(6)   |
| C(48)-C(49)      | 1.548(7)   |
| C(48)-C(50)      | 1.517(8)   |
| C(48)-C(51)      | 1.512(8)   |
| C(52)-C(53)      | 1.443(6)   |
| C(53)-C(54)      | 1.404(6)   |
| C(53)-C(58)      | 1.428(6)   |
| C(54)-C(55)      | 1.369(6)   |
| C(55)-C(56)      | 1.412(6)   |
| C(55)-C(59)      | 1.523(6)   |
| C(56)-C(57)      | 1.379(6)   |
| C(57)-C(58)      | 1.431(6)   |
| C(57)-C(63)      | 1.525(6)   |
| C(59)-C(60)      | 1.546(7)   |
| C(59)-C(61)      | 1.528(7)   |
| C(59)-C(62)      | 1.532(7)   |
| C(63)-C(64)      | 1.535(7)   |
| C(63)-C(65)      | 1.554(7)   |
| C(63)-C(66)      | 1.529(7)   |
| C(67)-C(68)      | 1.541(6)   |
| C(67)-C(72)      | 1.511(6)   |
| C(68)-C(69)      | 1.536(5)   |
| C(69)-C(70)      | 1.520(6)   |
| C(70)-C(71)      | 1.531(7)   |
| C(71)-C(72)      | 1.529(6)   |
| C(73)-C(74)      | 1.479(7)   |
| O(1)-Cr(1)-Cl(1) | 91.01(9)   |
| O(1)-Cr(1)-O(5)  | 90.37(12)  |
| O(1)-Cr(1)-N(1)  | 89.40(12)  |
| O(1)-Cr(1)-N(2)  | 171.62(13) |

|                  |            |
|------------------|------------|
| O(2)-Cr(1)-Cl(1) | 90.52(9)   |
| O(2)-Cr(1)-O(1)  | 97.54(11)  |
| O(2)-Cr(1)-O(5)  | 86.81(11)  |
| O(2)-Cr(1)-N(1)  | 173.00(13) |
| O(2)-Cr(1)-N(2)  | 90.79(12)  |
| O(5)-Cr(1)-Cl(1) | 177.14(9)  |
| O(5)-Cr(1)-N(1)  | 94.03(12)  |
| O(5)-Cr(1)-N(2)  | 89.21(12)  |
| N(1)-Cr(1)-Cl(1) | 88.49(10)  |
| N(2)-Cr(1)-Cl(1) | 89.79(10)  |
| N(2)-Cr(1)-N(1)  | 82.28(13)  |
| O(3)-Cr(2)-O(5)  | 92.92(12)  |
| O(3)-Cr(2)-N(3)  | 89.23(13)  |
| O(3)-Cr(2)-N(4)  | 170.60(13) |
| O(3)-Cr(2)-N(5)  | 85.96(14)  |
| O(4)-Cr(2)-O(3)  | 98.65(11)  |
| O(4)-Cr(2)-O(5)  | 89.81(12)  |
| O(4)-Cr(2)-N(3)  | 170.23(13) |
| O(4)-Cr(2)-N(4)  | 90.02(13)  |
| O(4)-Cr(2)-N(5)  | 87.87(13)  |
| O(5)-Cr(2)-N(3)  | 95.59(12)  |
| O(5)-Cr(2)-N(4)  | 90.72(12)  |
| O(5)-Cr(2)-N(5)  | 177.24(13) |
| N(3)-Cr(2)-N(4)  | 81.79(13)  |
| N(3)-Cr(2)-N(5)  | 86.92(14)  |
| N(4)-Cr(2)-N(5)  | 90.77(14)  |
| C(7)-O(1)-Cr(1)  | 126.4(3)   |
| C(18)-O(2)-Cr(1) | 129.5(3)   |
| C(39)-O(3)-Cr(2) | 126.6(3)   |
| C(58)-O(4)-Cr(2) | 129.4(3)   |
| Cr(2)-O(5)-Cr(1) | 155.29(15) |
| C(1)-N(1)-Cr(1)  | 123.5(3)   |
| C(1)-N(1)-C(31)  | 123.7(3)   |
| C(31)-N(1)-Cr(1) | 111.8(2)   |
| C(16)-N(2)-Cr(1) | 124.6(3)   |

|                   |          |
|-------------------|----------|
| C(16)-N(2)-C(32)  | 122.9(3) |
| C(32)-N(2)-Cr(1)  | 112.6(2) |
| C(37)-N(3)-Cr(2)  | 124.0(3) |
| C(37)-N(3)-C(68)  | 123.3(3) |
| C(68)-N(3)-Cr(2)  | 111.9(2) |
| C(52)-N(4)-Cr(2)  | 124.0(3) |
| C(52)-N(4)-C(67)  | 122.9(3) |
| C(67)-N(4)-Cr(2)  | 113.0(3) |
| C(73)-N(5)-Cr(2)  | 170.6(4) |
| N(1)-C(1)-C(2)    | 126.4(4) |
| C(3)-C(2)-C(1)    | 117.3(4) |
| C(3)-C(2)-C(7)    | 120.4(4) |
| C(7)-C(2)-C(1)    | 122.3(3) |
| C(4)-C(3)-C(2)    | 123.2(4) |
| C(3)-C(4)-C(5)    | 115.9(4) |
| C(3)-C(4)-C(8)    | 120.6(4) |
| C(5)-C(4)-C(8)    | 123.4(4) |
| C(6)-C(5)-C(4)    | 125.1(4) |
| C(5)-C(6)-C(7)    | 118.2(4) |
| C(5)-C(6)-C(12)   | 122.4(4) |
| C(7)-C(6)-C(12)   | 119.3(4) |
| O(1)-C(7)-C(2)    | 122.5(4) |
| O(1)-C(7)-C(6)    | 120.3(4) |
| C(6)-C(7)-C(2)    | 117.2(3) |
| C(9)-C(8)-C(4)    | 109.3(3) |
| C(10)-C(8)-C(4)   | 112.7(4) |
| C(10)-C(8)-C(9)   | 107.7(4) |
| C(10)-C(8)-C(11)  | 107.9(4) |
| C(11)-C(8)-C(4)   | 110.1(4) |
| C(11)-C(8)-C(9)   | 109.1(4) |
| C(6)-C(12)-C(14)  | 112.1(4) |
| C(6)-C(12)-C(15)  | 110.1(4) |
| C(13)-C(12)-C(6)  | 110.7(4) |
| C(13)-C(12)-C(14) | 106.7(4) |
| C(13)-C(12)-C(15) | 109.9(4) |

|                   |          |
|-------------------|----------|
| C(15)-C(12)-C(14) | 107.3(4) |
| N(2)-C(16)-C(17)  | 126.0(4) |
| C(18)-C(17)-C(16) | 123.5(3) |
| C(22)-C(17)-C(16) | 116.6(4) |
| C(22)-C(17)-C(18) | 119.6(4) |
| O(2)-C(18)-C(17)  | 122.7(4) |
| O(2)-C(18)-C(19)  | 118.8(3) |
| C(17)-C(18)-C(19) | 118.4(4) |
| C(18)-C(19)-C(23) | 119.1(3) |
| C(20)-C(19)-C(18) | 118.4(4) |
| C(20)-C(19)-C(23) | 122.5(3) |
| C(19)-C(20)-C(21) | 124.1(4) |
| C(20)-C(21)-C(27) | 120.0(4) |
| C(22)-C(21)-C(20) | 117.2(4) |
| C(22)-C(21)-C(27) | 122.7(4) |
| C(21)-C(22)-C(17) | 122.2(4) |
| C(19)-C(23)-C(24) | 111.0(3) |
| C(25)-C(23)-C(19) | 112.2(3) |
| C(25)-C(23)-C(24) | 106.9(3) |
| C(25)-C(23)-C(26) | 107.2(4) |
| C(26)-C(23)-C(19) | 109.5(3) |
| C(26)-C(23)-C(24) | 109.8(3) |
| C(28)-C(27)-C(21) | 110.2(4) |
| C(29)-C(27)-C(21) | 111.9(4) |
| C(29)-C(27)-C(28) | 109.0(4) |
| C(29)-C(27)-C(30) | 108.8(5) |
| C(30)-C(27)-C(21) | 109.4(4) |
| C(30)-C(27)-C(28) | 107.4(4) |
| N(1)-C(31)-C(32)  | 107.5(3) |
| N(1)-C(31)-C(36)  | 115.3(3) |
| C(36)-C(31)-C(32) | 112.3(3) |
| N(2)-C(32)-C(31)  | 106.0(3) |
| N(2)-C(32)-C(33)  | 117.7(3) |
| C(33)-C(32)-C(31) | 111.1(4) |
| C(32)-C(33)-C(34) | 109.8(4) |

|                   |          |
|-------------------|----------|
| C(35)-C(34)-C(33) | 110.6(4) |
| C(34)-C(35)-C(36) | 111.0(4) |
| C(31)-C(36)-C(35) | 110.0(3) |
| N(3)-C(37)-C(38)  | 125.9(4) |
| C(39)-C(38)-C(37) | 123.0(4) |
| C(43)-C(38)-C(37) | 116.2(4) |
| C(43)-C(38)-C(39) | 120.9(4) |
| O(3)-C(39)-C(38)  | 122.2(4) |
| O(3)-C(39)-C(40)  | 119.4(4) |
| C(38)-C(39)-C(40) | 118.3(4) |
| C(39)-C(40)-C(44) | 120.3(4) |
| C(41)-C(40)-C(39) | 117.7(4) |
| C(41)-C(40)-C(44) | 121.9(4) |
| C(40)-C(41)-C(42) | 124.4(4) |
| C(41)-C(42)-C(48) | 119.4(4) |
| C(43)-C(42)-C(41) | 117.2(4) |
| C(43)-C(42)-C(48) | 123.3(4) |
| C(42)-C(43)-C(38) | 121.4(4) |
| C(40)-C(44)-C(45) | 111.6(4) |
| C(40)-C(44)-C(47) | 108.1(4) |
| C(45)-C(44)-C(47) | 107.6(4) |
| C(46)-C(44)-C(40) | 111.4(4) |
| C(46)-C(44)-C(45) | 107.7(4) |
| C(46)-C(44)-C(47) | 110.3(4) |
| C(42)-C(48)-C(49) | 109.9(4) |
| C(50)-C(48)-C(42) | 108.4(4) |
| C(50)-C(48)-C(49) | 108.5(4) |
| C(51)-C(48)-C(42) | 111.8(4) |
| C(51)-C(48)-C(49) | 109.2(5) |
| C(51)-C(48)-C(50) | 108.9(5) |
| N(4)-C(52)-C(53)  | 126.7(4) |
| C(54)-C(53)-C(52) | 116.9(4) |
| C(54)-C(53)-C(58) | 120.3(4) |
| C(58)-C(53)-C(52) | 122.4(4) |
| C(55)-C(54)-C(53) | 122.6(4) |



|                   |          |
|-------------------|----------|
| C(54)-C(55)-C(56) | 115.9(4) |
| C(54)-C(55)-C(59) | 124.2(4) |
| C(56)-C(55)-C(59) | 119.9(4) |
| C(57)-C(56)-C(55) | 125.4(4) |
| C(56)-C(57)-C(58) | 117.6(4) |
| C(56)-C(57)-C(63) | 122.5(4) |
| C(58)-C(57)-C(63) | 119.9(4) |
| O(4)-C(58)-C(53)  | 122.4(4) |
| O(4)-C(58)-C(57)  | 119.5(4) |
| C(53)-C(58)-C(57) | 118.1(4) |
| C(55)-C(59)-C(60) | 107.6(4) |
| C(55)-C(59)-C(61) | 111.6(4) |
| C(55)-C(59)-C(62) | 111.0(4) |
| C(61)-C(59)-C(60) | 108.1(5) |
| C(61)-C(59)-C(62) | 108.8(5) |
| C(62)-C(59)-C(60) | 109.6(4) |
| C(57)-C(63)-C(64) | 112.1(4) |
| C(57)-C(63)-C(65) | 109.6(4) |
| C(57)-C(63)-C(66) | 110.1(4) |
| C(64)-C(63)-C(65) | 108.3(4) |
| C(66)-C(63)-C(64) | 107.2(4) |
| C(66)-C(63)-C(65) | 109.6(4) |
| N(4)-C(67)-C(68)  | 106.3(3) |
| N(4)-C(67)-C(72)  | 117.1(3) |
| C(72)-C(67)-C(68) | 110.6(4) |
| N(3)-C(68)-C(67)  | 106.6(3) |
| N(3)-C(68)-C(69)  | 116.1(3) |
| C(69)-C(68)-C(67) | 112.0(3) |
| C(70)-C(69)-C(68) | 110.8(3) |
| C(69)-C(70)-C(71) | 109.4(4) |
| C(72)-C(71)-C(70) | 111.3(4) |
| C(67)-C(72)-C(71) | 108.6(4) |
| N(5)-C(73)-C(74)  | 177.7(7) |

**Table S7.** Anisotropic displacement parameters ( $\text{\AA}^2 \times 10^3$ ) for the  $\mu$ -hydroxide non-tethered chromium salen complex. The anisotropic displacement factor exponent takes the form:  $-2p^2[h^2 a^{*2}U^{11} + \dots + 2hk a^* b^* U^{11}]$ .

|       | $U^{11}$ | $U^{22}$ | $U^{33}$ | $U^{23}$ | $U^{13}$ | $U^{12}$ |
|-------|----------|----------|----------|----------|----------|----------|
| Cr(1) | 13(1)    | 25(1)    | 18(1)    | -3(1)    | 1(1)     | -2(1)    |
| Cr(2) | 15(1)    | 26(1)    | 22(1)    | -6(1)    | 0(1)     | -1(1)    |
| Cl(1) | 26(1)    | 27(1)    | 46(1)    | 4(1)     | 2(1)     | 2(1)     |
| O(1)  | 14(2)    | 32(2)    | 20(2)    | -3(1)    | 2(1)     | -2(1)    |
| O(2)  | 16(2)    | 30(2)    | 19(2)    | -8(1)    | 4(1)     | -3(1)    |
| O(3)  | 19(2)    | 42(2)    | 25(2)    | -12(1)   | 6(1)     | -5(1)    |
| O(4)  | 20(2)    | 33(2)    | 19(2)    | -3(1)    | -4(1)    | -1(1)    |
| O(5)  | 17(2)    | 24(2)    | 23(2)    | -7(1)    | -4(1)    | 1(1)     |
| N(1)  | 18(2)    | 23(2)    | 18(2)    | -5(1)    | 3(2)     | -2(2)    |
| N(2)  | 18(2)    | 25(2)    | 18(2)    | 2(1)     | 2(1)     | -1(1)    |
| N(3)  | 15(2)    | 31(2)    | 24(2)    | -9(2)    | -1(1)    | -1(1)    |
| N(4)  | 18(2)    | 25(2)    | 25(2)    | -3(1)    | -2(2)    | -3(1)    |
| N(5)  | 24(2)    | 26(2)    | 43(2)    | -5(2)    | -3(2)    | 3(2)     |
| C(1)  | 20(2)    | 26(2)    | 21(2)    | -1(2)    | -2(2)    | -2(2)    |
| C(2)  | 17(2)    | 26(2)    | 27(2)    | -2(2)    | 1(2)     | -3(2)    |
| C(3)  | 21(2)    | 28(2)    | 25(2)    | -1(2)    | 0(2)     | -6(2)    |
| C(4)  | 18(2)    | 25(2)    | 33(2)    | -3(2)    | 2(2)     | -2(2)    |
| C(5)  | 22(2)    | 23(2)    | 31(2)    | -2(2)    | 13(2)    | -1(2)    |
| C(6)  | 20(2)    | 22(2)    | 24(2)    | 0(2)     | 4(2)     | 0(2)     |
| C(7)  | 17(2)    | 18(2)    | 27(2)    | -3(2)    | 2(2)     | -5(2)    |
| C(8)  | 16(2)    | 40(2)    | 39(3)    | -4(2)    | 0(2)     | 0(2)     |
| C(9)  | 23(2)    | 51(3)    | 47(3)    | -3(3)    | -4(2)    | -12(2)   |
| C(10) | 19(2)    | 75(4)    | 51(3)    | -11(3)   | 4(2)     | -1(2)    |
| C(11) | 21(2)    | 62(3)    | 66(4)    | 9(3)     | -12(2)   | 4(2)     |
| C(12) | 22(2)    | 42(3)    | 26(3)    | -8(2)    | 6(2)     | -5(2)    |
| C(13) | 42(3)    | 52(3)    | 23(3)    | -5(2)    | 6(2)     | -3(2)    |
| C(14) | 32(3)    | 75(4)    | 33(3)    | -19(3)   | 9(2)     | -9(3)    |
| C(15) | 37(3)    | 46(3)    | 32(3)    | -18(2)   | 2(2)     | -1(2)    |
| C(16) | 16(2)    | 22(2)    | 25(2)    | -1(2)    | 6(2)     | -1(2)    |

|       |       |        |       |        |        |        |
|-------|-------|--------|-------|--------|--------|--------|
| C(17) | 18(2) | 25(2)  | 23(2) | -2(2)  | 0(2)   | -2(2)  |
| C(18) | 18(2) | 16(2)  | 25(2) | -1(2)  | 0(2)   | 2(2)   |
| C(19) | 12(2) | 23(2)  | 28(2) | -3(2)  | -4(2)  | 4(2)   |
| C(20) | 28(2) | 24(2)  | 20(2) | -2(2)  | -4(2)  | -5(2)  |
| C(21) | 17(2) | 29(2)  | 24(2) | 2(2)   | -3(2)  | -2(2)  |
| C(22) | 17(2) | 27(2)  | 24(2) | 2(2)   | 4(2)   | 3(2)   |
| C(23) | 19(2) | 32(2)  | 16(2) | -1(2)  | -2(2)  | -2(2)  |
| C(24) | 36(3) | 33(2)  | 27(2) | 8(2)   | 0(2)   | 0(2)   |
| C(25) | 34(3) | 57(3)  | 22(2) | -8(2)  | -2(2)  | -6(2)  |
| C(26) | 34(3) | 32(2)  | 20(2) | 0(2)   | 6(2)   | 1(2)   |
| C(27) | 20(2) | 48(3)  | 31(3) | 1(2)   | -4(2)  | -14(2) |
| C(28) | 33(3) | 44(3)  | 79(4) | 7(3)   | -11(3) | -21(2) |
| C(29) | 34(3) | 163(7) | 40(3) | -2(4)  | 7(3)   | -56(4) |
| C(30) | 20(3) | 49(3)  | 75(4) | 3(3)   | -10(3) | -1(2)  |
| C(31) | 19(2) | 41(2)  | 17(2) | -4(2)  | 2(2)   | -8(2)  |
| C(32) | 15(2) | 44(3)  | 18(2) | 2(2)   | -1(2)  | -2(2)  |
| C(33) | 23(2) | 68(3)  | 20(2) | 1(2)   | 5(2)   | -10(2) |
| C(34) | 27(3) | 89(4)  | 15(2) | -3(2)  | 3(2)   | -5(3)  |
| C(35) | 30(3) | 74(4)  | 18(2) | -7(2)  | 2(2)   | -8(2)  |
| C(36) | 24(2) | 53(3)  | 18(2) | -4(2)  | 4(2)   | -11(2) |
| C(37) | 26(2) | 33(2)  | 28(3) | -9(2)  | -2(2)  | -2(2)  |
| C(38) | 23(2) | 28(2)  | 28(2) | -6(2)  | 4(2)   | -2(2)  |
| C(39) | 20(2) | 30(2)  | 24(2) | -3(2)  | -2(2)  | 2(2)   |
| C(40) | 20(2) | 34(2)  | 28(2) | 4(2)   | 3(2)   | 4(2)   |
| C(41) | 24(2) | 39(2)  | 26(2) | -5(2)  | 5(2)   | 8(2)   |
| C(42) | 37(3) | 38(3)  | 23(2) | -5(2)  | 8(2)   | 2(2)   |
| C(43) | 26(2) | 35(3)  | 30(2) | -7(2)  | -4(2)  | 3(2)   |
| C(44) | 14(2) | 52(3)  | 28(2) | 5(2)   | 6(2)   | -3(2)  |
| C(45) | 24(3) | 70(4)  | 34(3) | -2(3)  | 4(2)   | 0(2)   |
| C(46) | 23(2) | 53(3)  | 40(3) | -3(2)  | 1(2)   | -9(2)  |
| C(47) | 21(2) | 71(4)  | 36(3) | 0(2)   | -2(2)  | 2(2)   |
| C(48) | 47(3) | 40(3)  | 28(3) | -15(2) | 15(2)  | -7(2)  |
| C(49) | 66(4) | 57(3)  | 22(3) | -4(2)  | 14(2)  | -6(3)  |
| C(50) | 89(5) | 51(4)  | 49(4) | -9(3)  | 28(3)  | 6(3)   |
| C(51) | 72(4) | 104(5) | 31(3) | -29(3) | 20(3)  | -31(4) |

|       |       |        |        |        |       |        |
|-------|-------|--------|--------|--------|-------|--------|
| C(52) | 19(2) | 26(2)  | 32(3)  | 5(2)   | 4(2)  | -4(2)  |
| C(53) | 21(2) | 26(2)  | 26(2)  | 0(2)   | 1(2)  | -5(2)  |
| C(54) | 27(2) | 40(3)  | 27(2)  | 7(2)   | 0(2)  | -11(2) |
| C(55) | 36(3) | 30(2)  | 25(2)  | 4(2)   | -4(2) | -8(2)  |
| C(56) | 24(2) | 38(3)  | 24(2)  | -3(2)  | -4(2) | -5(2)  |
| C(57) | 23(2) | 22(2)  | 31(3)  | 8(2)   | -3(2) | 0(2)   |
| C(58) | 26(2) | 17(2)  | 28(2)  | 2(2)   | -1(2) | 3(2)   |
| C(59) | 29(3) | 55(3)  | 26(3)  | 1(2)   | 2(2)  | -13(2) |
| C(60) | 74(4) | 53(3)  | 35(3)  | 9(3)   | -5(3) | -20(3) |
| C(61) | 39(3) | 138(6) | 36(3)  | -25(4) | 8(3)  | -30(4) |
| C(62) | 62(4) | 44(3)  | 24(3)  | -2(2)  | -4(2) | -5(3)  |
| C(63) | 22(2) | 49(3)  | 31(3)  | -6(2)  | -3(2) | -2(2)  |
| C(64) | 24(3) | 103(5) | 59(4)  | -19(3) | -2(3) | -19(3) |
| C(65) | 26(3) | 44(3)  | 53(3)  | -3(2)  | 8(2)  | -13(2) |
| C(66) | 33(3) | 57(3)  | 52(3)  | 3(3)   | -2(2) | 17(3)  |
| C(67) | 24(2) | 25(2)  | 31(2)  | -8(2)  | 0(2)  | -1(2)  |
| C(68) | 18(2) | 27(2)  | 27(2)  | -8(2)  | -4(2) | -2(2)  |
| C(69) | 26(2) | 32(2)  | 29(2)  | -11(2) | 0(2)  | -6(2)  |
| C(70) | 18(2) | 47(3)  | 46(3)  | -19(2) | -1(2) | -9(2)  |
| C(71) | 29(3) | 42(3)  | 40(3)  | -14(2) | 8(2)  | -19(2) |
| C(72) | 30(3) | 41(3)  | 30(3)  | -10(2) | 5(2)  | -15(2) |
| C(73) | 31(3) | 42(3)  | 61(4)  | -4(3)  | -5(3) | -5(2)  |
| C(74) | 45(3) | 42(3)  | 166(8) | -32(4) | 20(5) | 10(3)  |

**Table S8.** Hydrogen coordinates ( $\times 10^4$ ) and isotropic parameters ( $\text{\AA}^2 \times 10^3$ ) for the  $\mu$ -hydroxide non-tethered chromium salen complex.

|        | x        | y        | z        | U(eq) |
|--------|----------|----------|----------|-------|
| H(5)   | 8860(20) | 1150(20) | 6876(15) | 26    |
| H(1)   | 11184    | 1195     | 8430     | 27    |
| H(3)   | 12465    | 1192     | 8106     | 30    |
| H(5A)  | 13048    | 964      | 6415     | 30    |
| H(9A)  | 13535    | 1890     | 8121     | 61    |
| H(9B)  | 13696    | 2227     | 7494     | 61    |
| H(9C)  | 14411    | 1941     | 7874     | 61    |
| H(10A) | 14260    | 750      | 6733     | 73    |
| H(10B) | 14862    | 1222     | 7076     | 73    |
| H(10C) | 14193    | 1543     | 6672     | 73    |
| H(11A) | 13707    | 677      | 8256     | 74    |
| H(11B) | 14576    | 701      | 7990     | 74    |
| H(11C) | 13937    | 208      | 7713     | 74    |
| H(13A) | 10987    | 1217     | 5248     | 59    |
| H(13B) | 11369    | 1741     | 5695     | 59    |
| H(13C) | 10625    | 1309     | 5892     | 59    |
| H(14A) | 12741    | 401      | 5614     | 70    |
| H(14B) | 12640    | 1184     | 5496     | 70    |
| H(14C) | 12206    | 656      | 5081     | 70    |
| H(15A) | 11619    | -271     | 5976     | 58    |
| H(15B) | 11102    | -3       | 5437     | 58    |
| H(15C) | 10787    | 72       | 6097     | 58    |
| H(16)  | 7873     | 13       | 8144     | 25    |
| H(20)  | 7087     | -788     | 5862     | 29    |
| H(22)  | 6835     | -339     | 7570     | 27    |
| H(24A) | 8487     | 601      | 5466     | 48    |
| H(24B) | 9182     | 254      | 5106     | 48    |
| H(24C) | 9288     | 412      | 5792     | 48    |
| H(25A) | 7686     | -341     | 5022     | 56    |
| H(25B) | 7885     | -1099    | 5185     | 56    |
| H(25C) | 8459     | -686     | 4763     | 56    |
| H(26A) | 9581     | -931     | 5384     | 43    |

|        |       |       |       |     |
|--------|-------|-------|-------|-----|
| H(26B) | 9032  | -1366 | 5807  | 43  |
| H(26C) | 9562  | -782  | 6075  | 43  |
| H(28A) | 6128  | -1499 | 5972  | 79  |
| H(28B) | 5421  | -1726 | 6390  | 79  |
| H(28C) | 6310  | -1857 | 6586  | 79  |
| H(29A) | 5918  | -1244 | 7534  | 118 |
| H(29B) | 5071  | -1101 | 7258  | 118 |
| H(29C) | 5599  | -495  | 7489  | 118 |
| H(30A) | 5708  | -345  | 5927  | 72  |
| H(30B) | 5466  | 50    | 6511  | 72  |
| H(30C) | 4944  | -563  | 6288  | 72  |
| H(31)  | 9345  | 1366  | 8472  | 31  |
| H(32)  | 9583  | -35   | 8625  | 30  |
| H(33A) | 8326  | -70   | 9044  | 44  |
| H(33B) | 8245  | 723   | 8976  | 44  |
| H(34A) | 8647  | 456   | 9950  | 52  |
| H(34B) | 9400  | 73    | 9698  | 52  |
| H(35A) | 9764  | 1149  | 10015 | 49  |
| H(35B) | 9128  | 1477  | 9584  | 49  |
| H(36A) | 10375 | 1551  | 9121  | 38  |
| H(36B) | 10513 | 765   | 9199  | 38  |
| H(37)  | 9796  | 2855  | 8606  | 35  |
| H(41)  | 6774  | 2518  | 9518  | 36  |
| H(43)  | 9025  | 3093  | 9412  | 36  |
| H(45A) | 5347  | 1799  | 8694  | 64  |
| H(45B) | 5724  | 2434  | 9013  | 64  |
| H(45C) | 5927  | 1699  | 9241  | 64  |
| H(46A) | 6179  | 1029  | 8118  | 58  |
| H(46B) | 6775  | 951   | 8657  | 58  |
| H(46C) | 7093  | 1177  | 8025  | 58  |
| H(47A) | 5816  | 2180  | 7748  | 64  |
| H(47B) | 6726  | 2319  | 7627  | 64  |
| H(47C) | 6230  | 2822  | 8028  | 64  |
| H(49A) | 6904  | 2558  | 10485 | 72  |
| H(49B) | 7426  | 2857  | 11007 | 72  |
| H(49C) | 7757  | 2260  | 10613 | 72  |

|        |       |      |       |     |
|--------|-------|------|-------|-----|
| H(50A) | 6738  | 3612 | 9974  | 95  |
| H(50B) | 7468  | 4095 | 9854  | 95  |
| H(50C) | 7172  | 3970 | 10513 | 95  |
| H(51A) | 8953  | 3052 | 10421 | 103 |
| H(51B) | 8500  | 3581 | 10824 | 103 |
| H(51C) | 8773  | 3784 | 10175 | 103 |
| H(52)  | 9970  | 2596 | 5924  | 31  |
| H(54)  | 9516  | 2173 | 5045  | 38  |
| H(56)  | 7267  | 1658 | 4824  | 34  |
| H(60A) | 7518  | 2256 | 3911  | 81  |
| H(60B) | 8186  | 2285 | 3417  | 81  |
| H(60C) | 8243  | 2756 | 3983  | 81  |
| H(61A) | 9457  | 1783 | 3565  | 106 |
| H(61B) | 9712  | 1479 | 4188  | 106 |
| H(61C) | 9607  | 2268 | 4113  | 106 |
| H(62A) | 7691  | 1037 | 4091  | 65  |
| H(62B) | 8551  | 734  | 4181  | 65  |
| H(62C) | 8300  | 1031 | 3555  | 65  |
| H(64A) | 5567  | 1526 | 5595  | 93  |
| H(64B) | 6259  | 1168 | 5239  | 93  |
| H(64C) | 6066  | 1938 | 5123  | 93  |
| H(65A) | 6963  | 1387 | 6728  | 62  |
| H(65B) | 6920  | 829  | 6225  | 62  |
| H(65C) | 6130  | 1130 | 6496  | 62  |
| H(66A) | 6715  | 2565 | 6504  | 71  |
| H(66B) | 5838  | 2382 | 6310  | 71  |
| H(66C) | 6395  | 2792 | 5873  | 71  |
| H(67)  | 9976  | 3403 | 7079  | 32  |
| H(68)  | 10504 | 2124 | 7480  | 29  |
| H(69A) | 10734 | 3369 | 8079  | 35  |
| H(69B) | 11036 | 2658 | 8307  | 35  |
| H(70A) | 11916 | 2576 | 7513  | 45  |
| H(70B) | 12070 | 3271 | 7843  | 45  |
| H(71A) | 11294 | 3839 | 7129  | 45  |
| H(71B) | 12005 | 3460 | 6812  | 45  |
| H(72A) | 10835 | 3258 | 6279  | 40  |

|        |       |      |      |     |
|--------|-------|------|------|-----|
| H(72B) | 11139 | 2567 | 6553 | 40  |
| H(74A) | 7494  | 4598 | 7329 | 127 |
| H(74B) | 7945  | 4556 | 7945 | 127 |
| H(74C) | 7099  | 4218 | 7873 | 127 |



## VIII. References

- <sup>1</sup> Morris, L. S.; Childers, M. I.; Coates, G. W., Bimetallic Chromium Catalysts with Chain Transfer Agents: A Route to Isotactic Poly(propylene oxide)s with Narrow Dispersities. *Angew. Chem. Int. Ed.* **2018**, *57*, 5731–5734.
- <sup>2</sup> Konsler, R. G.; Karl, J.; Jacobsen, E. N., Cooperative Asymmetric Catalysis with Dimeric Salen Complexes. *J. Am. Chem. Soc.* **1998**, *120*, 10780–10781.
- <sup>3</sup> DiCiccio, A. M.; Longo, J. M.; Coates, G. W., Development of Highly Active and Regioselective Catalysts for the Copolymerization of Epoxides with Cyclic Anhydrides: An Unanticipated Effect of Electronic Variation. *J. Am. Chem. Soc.* **2016**, *138*, 7107–7113.
- <sup>4</sup> Martinez, L. E.; Leighton, J. L.; Carsten, D. H.; Jacobsen, E. N., Highly Enantioselective Ring Opening of Epoxides Catalyzed by (salen)Cr(III) Complexes. *J. Am. Chem. Soc.* **1995**, *117*, 5897–5898.
- <sup>5</sup> Connelly, N. G.; Damhus, T.; Hartshorn, R. M.; Hutton, A.T. *Nomenclature of Inorganic Chemistry IUPAC Recommendations 2005*; the Royal Society of Chemistry: Cambridge, U.K., 2005; pp 80 – 81.
- <sup>6</sup> Ford, D. D.; Nielsen, L. P. C.; Zuend, S. J.; Musgrave, C. B.; Jacobsen, E. N., Mechanistic Basis for High Stereoselectivity and Broad Substrate Scope in the (salen)Co(III)-Catalyzed Hydrolytic Kinetic Resolution. *J. Am. Chem. Soc.* **2013**, *135*, 15595–15608.
- <sup>7</sup> Becke, A. D., Density-functional thermochemistry. III. The role of exact exchange. *J. Chem. Phys.* **1993**, *98*, 5648–5652
- <sup>8</sup> Rassolov, V. A.; Pople, J. A.; Ratner, M. A.; Windus, T.L.; 6-31G\* basis set for atoms K through Zn. *J. Chem. Phys.*, **1998**, *109*, 1223–1229.
- <sup>9</sup> Childers, M. I.; Vitek, A. K.; Morris, L. S.; Widger, P. C. B.; Ahmed, S. M.; Zimmerman, P. M.; Coates, G. W., Isospecific, Chain Shuttling Polymerization of Propylene Oxide Using a Bimetallic Chromium Catalyst: A New Route to Semicrystalline Polyols. *J. Am. Chem. Soc.* **2017**, *139*, 11048–11054.
- <sup>10</sup> Weingend, F.; Ahlrichs, R., Balanced basis sets of split valence, triple zeta valence and quadruple zeta valence quality for H to Rn: Design and assessment of accuracy. *Phys. Chem. Chem. Phys.*, **2005**, *7*, 3297–3305.
- <sup>11</sup> Neese, F., Software update: the ORCA program system, version 4.0. *Comp. Mol. Sci.*, **2017**, *8*, 1327.
- <sup>12</sup> Grimme, S.; Antony, J.; Ehrlich, S.; Krieg, H., A consistent and accurate ab initio parametrization of density functional dispersion correction (DFT-D) for the 94 elements H-Pu. *J. Chem. Phys.*, **2010**, *132*, 154104.
- <sup>13</sup> Marenich, A. V.; Cramer, C. J.; Truhlar, D. G., Universal solvation model based on solute electron density and on a continuum model of the solvent defined by the bulk dielectric constant and atomic surface tensions. *J. Phys. Chem. B*, **2009**, *113*, 6378–6396.
- <sup>14</sup> Zimmerman, P. M., Growing string method with interpolation and optimization in internal coordinates: Method and examples. *J. Chem. Phys.*, **2013**, *138*, 184102.
- <sup>15</sup> Zimmerman, P. M., Single-ended transition state finding with the growing string method. *J. Comp. Chem.*, **2015**, *36*, 601–611.
- <sup>16</sup> Zimmerman, P. M., Reliable Transition State Searches Integrated with the Growing String Method. *J. Chem. Theory and Comp.*, **2013**, *9*, 3043–3050.

<sup>17</sup> Schuchardt, K. L., Didier, B. T., Elsethagen, T., Sun, L., Gurumoorthi, V., Chase, J., Li, J., Windus, T.L., Basis set exchange: a community database for computational sciences. *J. Chem. Inf. Model.* **2007**, *47*, 1045–1052.

<sup>18</sup> Sheldrick, G. M., *SHELXL-97, A program for crystal structure refinement*. Göttingen, 1997

<sup>19</sup> Sheldrick, G. M., A short history of SHELX. *Acta Crystallographica Section A* **2008**, *64*, 112-122.

<sup>20</sup> Muller, P., Practical suggestions for better crystal structures AU. *Crystallography Reviews* **2009**, *15*, 57-83.

<sup>21</sup> Dolomanov, O. V.; Bourhis, L. J.; Gildea, R. J.; Howard, J. A. K.; Puschmann, H., OLEX2: a complete structure solution, refinement and analysis program. *Journal of Applied Crystallography* **2009**, *42*, 339-341
